# Supplementary material for: An asymmetric three-component reaction of a diazo compound with an alcohol and a seven-membered imine
Source: Royal Society of Chemistry journal article supplement (doi:10.1039/d2qo00076h), 2022-01-01
Supplement: d2qo00076h1.pdf [file d2qo00076h1.pdf]

## SUPPORTING INFORMATION

### **Asymmetric three-component reaction of diazo compound with alcohol and seven-membered imine**

Xiongda Xie, Ming Bao, Kewei, Chen, Xinfang Xu\* and Wenhao Hu\*

Guangdong Key Laboratory of Chiral Molecule and Drug Discovery, School of  
Pharmaceutical Sciences, Sun Yat-sen University, Guangzhou, Guangdong 510006,  
China

E-mail: xuxinfang@mail.sysu.edu.cn

huwh9@mail.sysu.edu.cn

### **Table of Contents**

|                                                                                       |                  |
|---------------------------------------------------------------------------------------|------------------|
| <b>1. General Information</b>                                                         | <b>S2</b>        |
| <b>2. Optimization of the Reaction Conditions</b>                                     | <b>S3</b>        |
| <b>3. General Procedure for the Synthesis of Diazo Compounds 1</b>                    | <b>S4-S6</b>     |
| <b>4. General Procedure for the Asymmetric Three-component Reaction</b>               | <b>S6-S28</b>    |
| <b>5. Control Experiment</b>                                                          | <b>S28-S29</b>   |
| <b>6. Procedure for the Scale Up and Synthetic Transformations</b>                    | <b>S30-S31</b>   |
| <b>7. <sup>1</sup>H and <sup>13</sup>C NMR Spectra of Compounds 5, 6, 7, 8, and 9</b> | <b>S32-S73</b>   |
| <b>8. HPLC Analyses Figures of Compounds 5, 6, 7, and 8</b>                           | <b>S74-S111</b>  |
| <b>9. Single-Crystal X-ray Diffraction of 5a and 7</b>                                | <b>S112-S113</b> |
| <b>10. References</b>                                                                 | <b>S114</b>      |

## General Information

All reactions were performed in oven-dried glassware under atmosphere of argon. Solvents were dried and distilled followed the standard methods before using. Chiral phosphoric acids (CPAs) and alcohols **2** purchased from chemical vendors and used directly without any treatment. Analytical thin-layer chromatography was performed using glass plates pre-coated with 200-300 mesh silica gel impregnated with a fluorescent indicator (254 nm). Flash column chromatography was performed using silica gel (300-400 mesh). <sup>1</sup>H NMR and <sup>13</sup>C NMR spectra were recorded in CDCl<sub>3</sub> on 400/500 MHz spectrometer; chemical shifts are reported in ppm with the solvent signals as reference, and coupling constants (J) are given in Hertz. The peak information is described as: br = broad, s = singlet, d = doublet, t = triplet, q = quartet, m = multiplet, comp = composite. Enantioselectivity was determined on HPLC using Chiralpak IA, AD-H, IF-3 column. High-resolution mass spectra (HRMS) were recorded on a commercial apparatus (ESI Source) and (CI Source). Starting materials **1**<sup>1</sup> and **3**<sup>2</sup> were prepared according to the reported reference.

**Table S1. Optimization of the Reaction Conditions<sup>a</sup>**

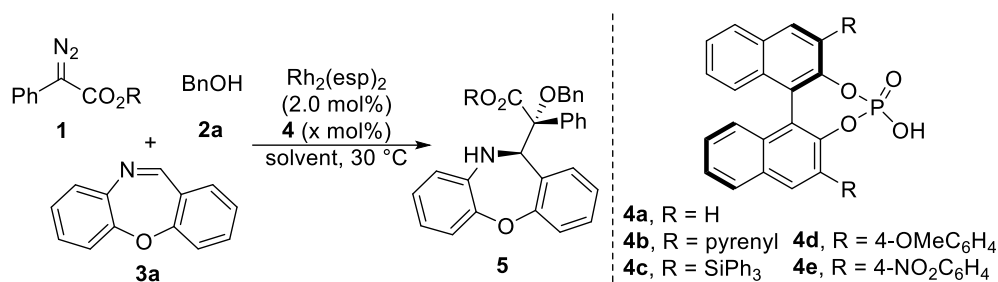

| Entry             | <b>4</b> (x mol %) | R           | Solvent | Yield (%) <sup>b</sup> | <i>dr</i> <sup>c</sup> | <i>ee</i> (%) <sup>d</sup> |
|-------------------|--------------------|-------------|---------|------------------------|------------------------|----------------------------|
| 1                 | <b>4a</b> (10)     | Ad          | DCE     | 61                     | 1:1                    | 30(11)                     |
| 2                 | <b>4b</b> (10)     | Ad          | DCE     | 90                     | 1.5:1                  | 99(95)                     |
| 3                 | <b>4c</b> (10)     | Ad          | DCE     | 79                     | > 20:1                 | 99                         |
| 4                 | <b>4d</b> (10)     | Ad          | DCE     | 66                     | 3:1                    | 93(80)                     |
| 5                 | <b>4e</b> (10)     | Ad          | DCE     | 56                     | 3:1                    | 86(77)                     |
| 6                 | <b>4c</b> (10)     | Me          | DCE     | 85                     | 2:1                    | 98(99)                     |
| 7                 | <b>4c</b> (10)     | <i>t</i> Bu | DCE     | 79                     | 20:1                   | 86                         |
| 8                 | <b>4c</b> (10)     | Ad          | DCM     | 65                     | > 20:1                 | 99                         |
| 9                 | <b>4c</b> (10)     | Ad          | TBME    | trace                  | > 20:1                 | 99                         |
| 10                | <b>4c</b> (10)     | Ad          | EA      | 46                     | > 20:1                 | 99                         |
| 11                | <b>4c</b> (10)     | Ad          | toluene | 69                     | > 20:1                 | 99                         |
| 12 <sup>e</sup>   | <b>4c</b> (10)     | Ad          | DCE     | 85                     | > 20:1                 | 99                         |
| 13 <sup>f</sup>   | <b>4c</b> (10)     | Ad          | DCE     | 95                     | > 20:1                 | 99                         |
| 14 <sup>f</sup>   | <b>4c</b> (5.0)    | Ad          | DCE     | 94                     | > 20:1                 | 99                         |
| 15 <sup>f</sup>   | <b>4c</b> (2.0)    | Ad          | DCE     | 70                     | > 20:1                 | 99                         |
| 16 <sup>f,g</sup> | <b>4c</b> (2.0)    | Ad          | DCE     | 96                     | > 20:1                 | 99                         |

<sup>a</sup>The reaction was carried out on a 0.1 mmol scale: to the mixture of Rh<sub>2</sub>(esp)<sub>2</sub> (2.0 mol%), **4** (indicated amount), **2a** (0.12 mmol), and 4 Å MS (100 mg) in the indicated solvent (0.5 mL), was added a solution of diazo compound **1a** (0.12 mmol) and imine **3a** (0.1 mmol) in the same solvent (1.5 mL) *via* syringe pump over 2 h under an argon atmosphere at 30 °C, and the reaction mixture was stirred for an additional 1 h under these conditions. <sup>b</sup>Isolated yields. <sup>c</sup>Determined by <sup>1</sup>H NMR analysis of the crude reaction mixture. <sup>d</sup>Determined by chiral HPLC analysis, see SI for detail. <sup>e</sup>3 Å MS (100 mg) was used instead of 4 Å MS. <sup>f</sup>5 Å MS (100 mg) was used instead of 4 Å MS. <sup>g</sup>The amount of Rh<sub>2</sub>(esp)<sub>2</sub> was reduced to 1.0 mol%, and the mixture of **1a** and **3a** in DCE was added *via* syringe pump over 10 h. DCM = dichloromethane. TBME = *tert*-butyl methyl ether. EA = ethyl acetate.

## General Procedure for the Synthesis of Diazo Compounds 1:

The diazo compounds **1** were prepared according to literature procedures.<sup>1</sup>

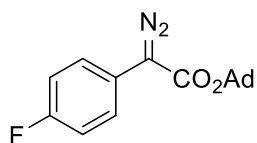

**(3r)-Adamantan-1-yl 2-diazo-2-(4-fluorophenyl)acetate (1b).** Yellow oil; <sup>1</sup>H NMR (400 MHz, CDCl<sub>3</sub>) (δ, ppm) 7.46 – 7.39 (m, 2H), 7.10 – 7.03 (m, 2H), 2.22 – 2.16 (comp, 9H), 1.71 – 1.65 (comp, 6H); <sup>13</sup>C NMR (100 MHz, CDCl<sub>3</sub>) (δ, ppm) 164.4, 161.0 (d, *J* = 245.9 Hz), 126.0 (d, *J* = 7.9 Hz), 122.08, 116.0 (d, *J* = 21.9 Hz), 82.4, 41.8, 36.3, 31.1; <sup>19</sup>F NMR (376 MHz, CDCl<sub>3</sub>) δ = -116.8. HRMS (TOF MS ESI<sup>+</sup>) calculated for C<sub>18</sub>H<sub>19</sub>FN<sub>2</sub>NaO<sub>2</sub> [M+Na]<sup>+</sup>: 337.1323, found 337.1324.

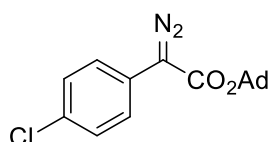

**(3r)-Adamantan-1-yl 2-(4-chlorophenyl)-2-diazoacetate (1c).** Yellow oil; <sup>1</sup>H NMR 7.41 – 7.37 (m, 2H), 7.33 – 7.29 (m, 2H), 2.24 – 2.14 (comp, 9H), 1.75 – 1.62 (comp, 6H); <sup>13</sup>C NMR (100 MHz, CDCl<sub>3</sub>) (δ, ppm) 164.0, 131.2, 129.0, 125.1, 125.0, 82.5, 41.8, 36.2, 31.1; HRMS (TOF MS ESI<sup>+</sup>) calculated for C<sub>18</sub>H<sub>19</sub>ClN<sub>2</sub>NaO<sub>2</sub> [M+Na]<sup>+</sup>: 353.1027, found 353.1020.

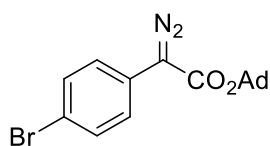

**(3r)-Adamantan-1-yl 2-(4-bromophenyl)-2-diazoacetate (1d).** Yellow oil; <sup>1</sup>H NMR (400 MHz, CDCl<sub>3</sub>) (δ, ppm) 7.49 – 7.44 (m, 2H), 7.36 – 7.30 (m, 2H), 2.23 – 2.16 (comp, 9H), 1.72 – 1.66 (comp, 6H); <sup>13</sup>C NMR (100 MHz, CDCl<sub>3</sub>) (δ, ppm) 163.8, 132.0, 125.5, 125.4, 119.0, 82.5, 41.8, 36.2, 31.0; HRMS (TOF MS ESI<sup>+</sup>) calculated for C<sub>18</sub>H<sub>19</sub>BrN<sub>2</sub>NaO<sub>2</sub> [M+Na]<sup>+</sup>: 397.0522, found 397.0519.

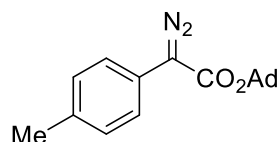

**(3r)-Adamantan-1-yl 2-diazo-2-(p-tolyl)acetate (1e).** Yellow oil;  $^1\text{H}$  NMR (400 MHz,  $\text{CDCl}_3$ ) ( $\delta$ , ppm) 7.37 – 7.31 (m, 2H), 7.19 – 7.14 (m, 2H), 2.32 (s, 3H), 2.22 – 2.18 (comp, 9H), 1.73 – 1.66 (comp, 6H);  $^{13}\text{C}$  NMR (100 MHz,  $\text{CDCl}_3$ ) ( $\delta$ , ppm) 164.6, 135.4, 129.7, 129.23, 129.20, 124.2, 82.1, 41.8, 36.3, 31.1, 21.1; HRMS (TOF MS  $\text{ESI}^+$ ) calculated for  $\text{C}_{19}\text{H}_{22}\text{N}_2\text{NaO}_2$  [ $\text{M}+\text{Na}$ ] $^+$ : 333.1573, found 333.1574.

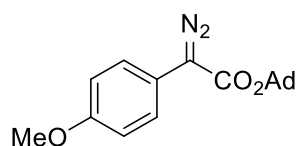

**(3r)-Adamantan-1-yl 2-diazo-2-(4-methoxyphenyl)acetate (1f).** Yellow oil;  $^1\text{H}$  NMR (400 MHz,  $\text{CDCl}_3$ ) ( $\delta$ , ppm) 7.32 – 7.27 (m, 2H), 6.87 – 6.83 (m, 2H), 3.72 (s, 3H), 2.15 – 2.10 (comp, 9H), 1.65 – 1.59 (comp, 6H);  $^{13}\text{C}$  NMR (100 MHz,  $\text{CDCl}_3$ ) ( $\delta$ , ppm) 164.9, 158.0, 126.0, 117.8, 114.6, 82.1, 55.5, 41.9, 36.3, 31.1; HRMS (TOF MS  $\text{ESI}^+$ ) calculated for  $\text{C}_{19}\text{H}_{22}\text{N}_2\text{NaO}_3$  [ $\text{M}+\text{Na}$ ] $^+$ : 349.1523, found 349.1520.

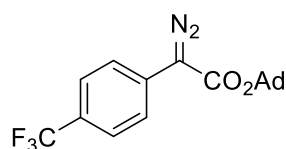

**(3r)-Adamantan-1-yl 2-diazo-2-(4-(trifluoromethyl)phenyl)acetate (1g).** Yellow oil;  $^1\text{H}$  NMR (400 MHz,  $\text{CDCl}_3$ ) ( $\delta$ , ppm) 7.61 – 7.55 (comp, 4H), 2.25 – 2.16 (comp, 9H), 1.75 – 1.64 (comp, 6H);  $^{13}\text{C}$  NMR (100 MHz,  $\text{CDCl}_3$ ) ( $\delta$ , ppm) 163.3, 130.8, 127.2 (q,  $J = 32.7$  Hz), 125.7 (q,  $J = 3.8$  Hz), 124.9 (q,  $J = 271.7$  Hz), 123.4, 82.8, 41.7, 36.1, 31.0;  $^{19}\text{F}$  NMR (471 MHz,  $\text{CDCl}_3$ )  $\delta = -62.4$ . HRMS (TOF MS  $\text{ESI}^+$ ) calculated for  $\text{C}_{19}\text{H}_{19}\text{F}_3\text{N}_2\text{NaO}_2$  [ $\text{M}+\text{Na}$ ] $^+$ : 387.1291, found 387.1290.

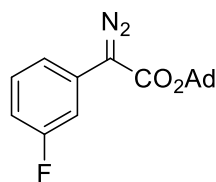

**(3r)-Adamantan-1-yl 2-diazo-2-(3-fluorophenyl)acetate (1h).** Yellow oil;  $^1\text{H}$  NMR (400 MHz,  $\text{CDCl}_3$ ) ( $\delta$ , ppm) 7.36 – 7.32 (m, 1H), 7.32 – 7.27 (m, 1H), 7.15 – 7.10 (m,

1H), 6.82 (tdd,  $J = 8.3, 2.5, 0.6$  Hz, 1H), 2.43 – 2.03 (comp, 9H), 1.81 – 1.54 (comp, 6H);  $^{13}\text{C}$  NMR (100 MHz,  $\text{CDCl}_3$ ) ( $\delta$ , ppm) 163.7, 163.3 (d,  $J = 245.1$  Hz), 130.2 (d,  $J = 8.8$  Hz), 128.9 (d,  $J = 9.5$  Hz), 118.9 (d,  $J = 2.8$  Hz), 112.2 (d,  $J = 21.4$  Hz), 111.1 (d,  $J = 25.4$  Hz), 82.6, 41.8, 36.2, 31.0;  $^{19}\text{F}$  NMR (471 MHz,  $\text{CDCl}_3$ )  $\delta = -112.0$ ; HRMS (TOF MS ESI<sup>+</sup>) calculated for  $\text{C}_{18}\text{H}_{19}\text{FN}_2\text{NaO}_2$   $[\text{M}+\text{Na}]^+$ : 337.1323, found 337.1333.

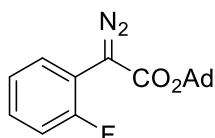

**(3r)-Adamantan-1-yl 2-diazo-2-(2-fluorophenyl)acetate (1i).** Yellow oil;  $^1\text{H}$  NMR (400 MHz,  $\text{CDCl}_3$ ) ( $\delta$ , ppm) 7.73 – 7.63 (m, 1H), 7.23 – 7.11 (m, 2H), 7.08 – 6.99 (m, 1H), 2.20 – 2.15 (comp, 9H), 1.73 – 1.63 (comp, 6H);  $^{13}\text{C}$  NMR (100 MHz,  $\text{CDCl}_3$ ) ( $\delta$ , ppm) 164.2, 158.4 (d,  $J = 247.1$  Hz), 129.5 (d,  $J = 2.2$  Hz), 128.2 (d,  $J = 8.2$  Hz), 124.5 (d,  $J = 3.4$  Hz), 115.6 (d,  $J = 21.4$  Hz), 114.5 (d,  $J = 11.8$  Hz), 82.3, 41.7, 36.2, 31.0;  $^{19}\text{F}$  NMR (376 MHz,  $\text{CDCl}_3$ )  $\delta = -114.1$ . HRMS (TOF MS ESI<sup>+</sup>) calculated for  $\text{C}_{18}\text{H}_{19}\text{FN}_2\text{NaO}_2$   $[\text{M}+\text{Na}]^+$ : 337.1323, found 337.1325.

### General Procedure for the Asymmetric Three-component Reaction

To a 10-mL oven-dried vial with a magnetic stirring bar, alcohol **2** (0.12 mmol),  $\text{Rh}_2(\text{esp})_2$  (0.76 mg, 1.0 mol%), chiral phosphoric acid **4c** (1.73 mg, 2.0 mol%), and 5 Å MS (100 mg) in 0.5 mL DCE, a solution of diazo compound **1** (0.12 mmol) and imine **3** (0.1 mmol) in DCE (1.5 mL) was added *via* a syringe pump over 10 h (or 2 h in the cases with **3m**) under argon atmosphere at 30 °C, and the reaction mixture was stirred for additional 1 h under these conditions. The crude reaction mixture was subjected to proton NMR analysis to determine the *dr* values and purified by column chromatography on silica gel without any additional treatment (Hexanes : EtOAc = 50:1) to give the pure products **5** or **6** in generally good to high yields with excellent enantioselectivity.

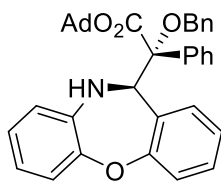

**(3R)-Adamantan-1-yl (2R)-2-(benzyloxy)-2-((R)-10,11-dihydrodibenzo[*b,f*][1,4]oxazepin-11-yl)-2-phenylacetate (5a)** White solid, 54.8 mg, 96% yield, > 20:1 *dr*, 99% *ee*,  $[\alpha]_D^{20} = -66.1^\circ$  ( $c = 0.30$ , DCM), mp = 116 – 118 °C;  $^1\text{H NMR}$  (500 MHz,  $\text{CDCl}_3$ )  $\delta$  7.40 – 7.38 (m, 2H), 7.34 – 7.30 (comp, 5H), 7.29 – 7.25 (m, 2H), 7.24 (s, 1H), 7.22 – 7.16 (m, 2H), 7.02 – 6.93 (m, 2H), 6.89 – 6.85 (m, 1H), 6.84 – 6.78 (m, 1H), 6.61 – 6.57 (m, 2H), 5.30 (s, 1H), 4.84 (d,  $J = 12.0$  Hz, 1H), 4.46 (d,  $J = 12.0$  Hz, 1H), 4.42 (s, 1H), 2.13 – 2.02 (comp, 9H), 1.65 – 1.60 (comp, 6H);  $^{13}\text{C NMR}$  (125 MHz,  $\text{CDCl}_3$ )  $\delta$  169.9, 157.7, 145.7, 138.9, 137.9, 136.0, 131.0, 129.1, 129.0, 128.6, 128.3, 128.0, 127.4, 127.2, 126.9, 124.4, 123.3, 121.4, 120.5, 119.04, 119.03, 88.0, 83.3, 67.7, 64.7, 41.3, 36.1, 30.9; HRMS (TOF MS ESI<sup>+</sup>) calculated for  $\text{C}_{38}\text{H}_{38}\text{NO}_4$   $[\text{M} + \text{H}]^+$ : 572.2795, found 572.2799; HPLC conditions for determination of enantiomeric excess: Chiral AD-H,  $\lambda = 254$  nm, hexane : isopropanol = 98:2, flow rate = 1.0 mL/min,  $t_{\text{major}} = 14.2$  min.

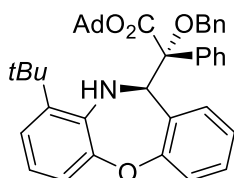

**(3R)-Adamantan-1-yl (2R)-2-(benzyloxy)-2-((R)-9-(*tert*-butyl)-10,11-dihydrodibenzo[*b,f*][1,4]oxazepin-11-yl)-2-phenylacetate (5b)** Colorless oil, 55.8 mg, 89% yield, > 20:1 *dr*, 99% *ee*,  $^1\text{H NMR}$  (400 MHz,  $\text{CDCl}_3$ )  $\delta$  7.47 – 7.43 (m, 2H), 7.40 – 7.35 (comp, 4H), 7.34 – 7.26 (comp, 4H), 7.26 – 7.23 (m, 1H), 7.20 – 7.15 (m, 1H), 7.05 – 7.00 (m, 1H), 6.97 – 6.92 (m, 1H), 6.88 – 6.84 (m, 1H), 6.67 – 6.59 (m, 2H), 5.30 (s, 1H), 4.89 (d,  $J = 11.9$  Hz, 1H), 4.50 (d,  $J = 11.9$  Hz, 1H), 4.44 (s, 1H), 2.17 – 2.12 (m, 3H), 2.09 – 1.98 (comp, 6H), 1.67 – 1.62 (comp, 6H), 1.25 (s, 9H);  $^{13}\text{C NMR}$  (100 MHz,  $\text{CDCl}_3$ )  $\delta$  170.0, 158.0, 147.4, 144.0, 139.0, 137.1, 136.2, 130.9, 129.2, 129.1, 128.7, 128.4, 128.1, 127.6, 127.3, 127.1, 123.3, 120.9, 120.5, 116.54, 116.49,

88.1, 83.3, 67.9, 65.0, 41.3, 36.2, 34.3, 31.5, 31.0; HRMS (TOF MS ESI<sup>+</sup>) calculated for C<sub>42</sub>H<sub>46</sub>NO<sub>4</sub> [M + H]<sup>+</sup>: 628.3421 found 628.3428; HPLC conditions for determination of enantiomeric excess: Chiral AD-H, λ = 254 nm, hexane : isopropanol = 80:20, flow rate = 1.0 mL/min, t<sub>major</sub> = 3.5 min.

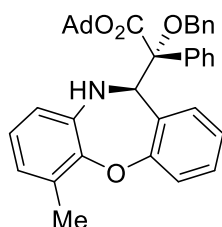

**(3R)-Adamantan-1-yl (2R)-2-(benzyloxy)-2-((R)-6-methyl-10,11-dihydrodibenzo [b,f][1,4]oxazepin-11-yl)-2-phenylacetate (5c)** Colorless oil, 53.8 mg, 92% yield, > 20:1 *dr*, 99% *ee*, [α]<sub>D</sub><sup>20</sup> = - 36.8° (c = 0.30, DCM); <sup>1</sup>H NMR (500 MHz, CDCl<sub>3</sub>) (δ, ppm) δ 7.39 (d, *J* = 7.6 Hz, 2H), 7.37 – 7.33 (comp, 4H), 7.31 – 7.26 (m, 2H), 7.24 – 7.15 (comp, 4H), 7.02 (d, *J* = 7.9 Hz, 1H), 6.92 (m, 1H), 6.71 (m, 1H), 6.50 (d, *J* = 7.3 Hz, 1H), 6.46 (d, *J* = 7.8 Hz, 1H), 5.25 (s, 1H), 4.83 (d, *J* = 11.9 Hz, 1H), 4.49 (d, *J* = 11.9 Hz, 1H), 4.45 (s, 1H), 2.26 (s, 3H), 2.18 – 2.13 (m, 3H), 2.12 – 2.04 (comp, 6H), 1.67 – 1.62 (comp, 6H); <sup>13</sup>C NMR (100 MHz, CDCl<sub>3</sub>) (δ, ppm) δ 169.9, 157.8, 144.5, 139.0, 138.0, 136.1, 131.1, 130.4, 129.2, 129.0, 128.8, 128.4, 128.0, 127.5, 127.3, 127.1, 123.8, 123.2, 121.01, 121.00, 117.1, 88.3, 83.3, 67.8, 65.2, 41.4, 36.2, 31.0, 17.0; HRMS (TOF MS ESI<sup>+</sup>) calculated for C<sub>39</sub>H<sub>40</sub>NO<sub>4</sub> [M + H]<sup>+</sup>: 586.2952, found 586.2959; HPLC conditions for determination of enantiomeric excess: Chiral AD-H, λ = 254 nm, hexane : isopropanol = 98:2, flow rate = 1.0 mL/min, t<sub>major</sub> = 8.7 min.

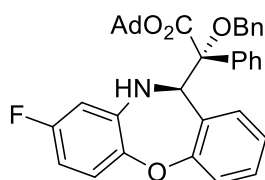

**(3R)-Adamantan-1-yl (2R)-2-(benzyloxy)-2-((R)-8-fluoro-10,11-dihydrodibenzo [b,f][1,4]oxazepin-11-yl)-2-phenylacetate (5d)** White solid, 54.2 mg, 92% yield, > 20:1 *dr*, 99% *ee*, mp = 142 – 144°C; <sup>1</sup>H NMR (400 MHz, CDCl<sub>3</sub>) δ 7.41 – 7.34 (comp,



6H), 7.34 – 7.29 (m, 3H), 7.28 – 7.26 (m, 1H), 7.25 – 7.19 (m, 2H), 7.04 – 6.97 (m, 2H), 6.86 – 6.79 (m, 1H), 6.34 – 6.23 (m, 2H), 5.29 (d,  $J = 2.9$  Hz, 1H), 4.87 (d,  $J = 12.0$  Hz, 1H), 4.55 (s, 1H), 4.52 (d,  $J = 12.0$  Hz, 1H), 2.19 – 2.14 (m, 3H), 2.13 – 2.04 (comp, 6H), 1.69 – 1.63 (comp, 6H);  $^{13}\text{C}$  NMR (100 MHz,  $\text{CDCl}_3$ )  $\delta$  169.9, 159.7 (d,  $J = 239.8$  Hz), 157.8, 141.7 (d,  $J = 2.1$  Hz), 139.2 (d,  $J = 10.9$  Hz), 138.8, 135.9, 131.2, 129.5, 128.8, 128.6, 128.4, 128.2, 127.6, 127.4, 127.0, 123.7, 122.2 (d,  $J = 10.2$  Hz), 120.5, 105.0 (d,  $J = 26.0$  Hz), 104.8 (d,  $J = 23.0$  Hz), 88.0, 83.5, 67.9, 64.6, 41.4, 36.2, 31.0;  $^{19}\text{F}$  NMR (376 MHz,  $\text{CDCl}_3$ )  $\delta$  -119.6; HRMS (TOF MS  $\text{ESI}^+$ ) calculated for  $\text{C}_{38}\text{H}_{37}\text{FNO}_4$   $[\text{M} + \text{H}]^+$ : 590.2701, found 590.2696; HPLC conditions for determination of enantiomeric excess: Chiral AD-H,  $\lambda = 254$  nm, hexane : isopropanol = 80:20, flow rate = 1.0 mL/min,  $t_{\text{major}} = 4.9$  min.

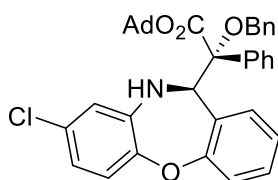

**(3R)-Adamantan-1-yl (2R)-2-(benzyloxy)-2-((R)-8-chloro-10,11-dihydrodibenzo [b,f][1,4]oxazepin-11-yl)-2-phenylacetate (5e)** White solid, 55.1 mg, 91% yield, > 20:1 *dr*, 99% *ee*,  $[\alpha]_{\text{D}}^{20} = -68.1^\circ$  ( $c = 0.30$ , DCM); mp = 182 – 184 °C;  $^1\text{H}$  NMR (400 MHz,  $\text{CDCl}_3$ )  $\delta$  7.37 – 7.33 (m, 3H), 7.33 – 7.29 (comp, 4H), 7.29 – 7.26 (m, 2H), 7.25 – 7.22 (m, 2H), 7.21 – 7.17 (m, 1H), 7.00 – 6.94 (m, 2H), 6.77 (d,  $J = 8.4$  Hz, 1H), 6.55 (d,  $J = 2.4$  Hz, 1H), 6.53 – 6.48 (m, 1H), 5.25 (s, 1H), 4.83 (d,  $J = 12.0$  Hz, 1H), 4.55 (s, 1H), 4.49 (d,  $J = 12.0$  Hz, 1H), 2.16 – 2.11 (m, 3H), 2.10 – 2.01 (comp, 6H), 1.67 – 1.60 (comp, 6H);  $^{13}\text{C}$  NMR (100 MHz,  $\text{CDCl}_3$ )  $\delta$  169.9, 157.5, 144.1, 139.0, 138.8, 135.9, 131.3, 129.5, 129.2, 128.6, 128.4, 128.2, 127.6, 127.4, 127.03, 127.01, 123.7, 122.5, 120.5, 118.6, 118.2, 88.0, 83.6, 67.9, 64.7, 41.4, 36.2, 31.0; HRMS (TOF MS  $\text{ESI}^+$ ) calculated for  $\text{C}_{38}\text{H}_{37}\text{ClNO}_4$   $[\text{M} + \text{H}]^+$ : 606.2406, found 606.2407; HPLC conditions for determination of enantiomeric excess: Chiral AD-H,  $\lambda = 317$  nm, hexane : isopropanol = 80:20, flow rate = 1.0 mL/min,  $t_{\text{major}} = 4.4$  min.

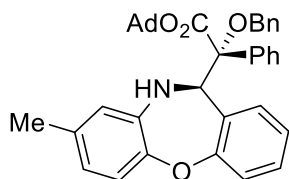

**(3R)-Adamantan-1-yl (2R)-2-(benzyloxy)-2-((R)-8-methyl-10,11-dihydrodibenzo [b,f][1,4]oxazepin-11-yl)-2-phenylacetate (5f)** White solid, 52.7 mg, 90% yield, > 20:1 *dr*, 99% *ee*,  $[\alpha]_D^{20} = -54.0^\circ$  ( $c = 0.43$ , DCM),  $mp = 173 - 175^\circ C$ ;  $^1H$  NMR (500 MHz,  $CDCl_3$ )  $\delta$  7.45 – 7.41 (m, 2H), 7.40 – 7.34 (comp, 5H), 7.34 – 7.27 (m, 3H), 7.25 – 7.22 (m, 1H), 7.21 – 7.17 (m, 1H), 7.03 – 6.96 (m, 2H), 6.81 (d,  $J = 7.9$  Hz, 1H), 6.47 – 6.38 (m, 2H), 5.35 (s, 1H), 4.89 (d,  $J = 12.0$  Hz, 1H), 4.52 (d,  $J = 12.0$  Hz, 1H), 4.39 (s, 1H), 2.18 (s, 3H), 2.16 – 2.04 (comp, 9H), 1.68 – 1.63 (comp, 6H);  $^{13}C$  NMR (125 MHz,  $CDCl_3$ )  $\delta$  170.0, 158.1, 144.0, 139.0, 137.6, 136.1, 134.1, 130.9, 129.3, 129.2, 128.7, 128.4, 128.1, 127.5, 127.3, 127.0, 123.5, 121.2, 120.5, 119.8, 119.7, 88.0, 83.3, 67.8, 64.4, 41.4, 36.2, 31.0, 20.8; HRMS (TOF MS ESI<sup>+</sup>) calculated for  $C_{39}H_{40}NO_4$   $[M + H]^+$ : 586.2952, found 586.2943; HPLC conditions for determination of enantiomeric excess: Chiral AD-H,  $\lambda = 254$  nm, hexane : isopropanol = 80:20, flow rate = 1.0 mL/min,  $t_{major} = 3.9$  min.

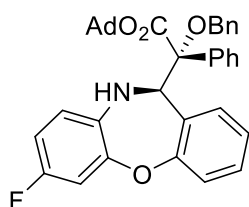

**(3R)-Adamantan-1-yl (2R)-2-(benzyloxy)-2-((R)-7-fluoro-10,11-dihydrodibenzo [b,f][1,4]oxazepin-11-yl)-2-phenylacetate (5g)** White solid, 48.3 mg, 82% yield, > 20:1 *dr*, 99% *ee*,  $mp = 142 - 144^\circ C$ ;  $^1H$  NMR (500 MHz,  $CDCl_3$ )  $\delta$  7.42 – 7.38 (m, 2H), 7.37 – 7.30 (comp, 6H), 7.30 – 7.26 (m, 2H), 7.25 – 7.23 (m, 1H), 7.23 – 7.18 (m, 1H), 7.03 – 6.95 (m, 2H), 6.67 – 6.62 (m, 1H), 6.60 – 6.50 (m, 2H), 5.24 (s, 1H), 4.87 (d,  $J = 12.0$  Hz, 1H), 4.46 (d,  $J = 12.0$  Hz, 1H), 4.34 (s, 1H), 2.19 – 2.12 (m, 3H), 2.10 – 2.02 (comp, 6H), 1.69 – 1.62 (comp, 6H);  $^{13}C$  NMR (125 MHz,  $CDCl_3$ )  $\delta$  170.0, 157.3, 156.3 (d,  $J = 238.2$  Hz), 146.3 (d,  $J = 10.6$  Hz), 139.0, 136.1, 134.2 (d,  $J = 2.7$

Hz), 131.0, 129.2, 129.0, 128.7, 128.4, 128.2, 127.6, 127.4, 127.1, 123.6, 120.5, 119.8 (d,  $J = 8.9$  Hz), 110.9 (d,  $J = 22.2$  Hz), 108.7 (d,  $J = 24.3$  Hz), 88.2, 83.4, 67.9, 64.8, 41.4, 36.2, 31.0;  $^{19}\text{F}$  NMR (471 MHz,  $\text{CDCl}_3$ )  $\delta$  -124.7; HRMS (TOF MS  $\text{ESI}^+$ ) calculated for  $\text{C}_{38}\text{H}_{37}\text{FNO}_4$   $[\text{M} + \text{H}]^+$ : 590.2701, found 590.2696; HPLC conditions for determination of enantiomeric excess: Chiral AD-H,  $\lambda = 266$  nm, hexane : isopropanol = 80:20, flow rate = 1.0 mL/min,  $t_{\text{major}} = 5.7$  min.

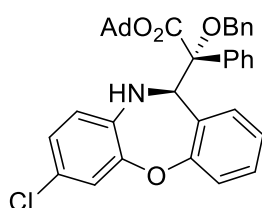

**(3R)-Adamantan-1-yl (2R)-2-(benzyloxy)-2-((R)-7-chloro-10,11-dihydrodibenzo [b,f][1,4]oxazepin-11-yl)-2-phenylacetate (5h)** White solid, 50.2 mg, 83% yield, > 20:1 *dr*, 99% *ee*,  $[\alpha]_{\text{D}}^{20} = -57.1^\circ$  ( $c = 0.30$ , DCM),  $\text{mp} = 144 - 146$  °C;  $^1\text{H}$  NMR (500 MHz,  $\text{CDCl}_3$ )  $\delta$  7.41 – 7.34 (comp, 4H), 7.34 – 7.28 (comp, 6H), 7.24 – 7.19 (m, 2H), 7.02 – 6.96 (m, 2H), 6.88 (d,  $J = 2.3$  Hz, 1H), 6.82 – 6.77 (m, 1H), 6.50 (d,  $J = 8.5$  Hz, 1H), 5.22 (s, 1H), 4.84 (d,  $J = 12.0$  Hz, 1H), 4.48 (d,  $J = 12.0$  Hz, 1H), 4.42 (s, 1H), 2.18 – 2.14 (m, 3H), 2.12 – 2.02 (comp, 6H), 1.68 – 1.62 (comp, 6H);  $^{13}\text{C}$  NMR (125 MHz,  $\text{CDCl}_3$ )  $\delta$  169.9, 157.3, 145.7, 138.9, 136.7, 136.0, 131.4, 129.5, 128.6, 128.5, 128.4, 128.2, 127.6, 127.4, 127.1, 124.2, 123.6, 122.9, 121.6, 120.6, 119.7, 88.3, 83.5, 67.9, 65.1, 41.4, 36.2, 31.0; HRMS (TOF MS  $\text{ESI}^+$ ) calculated for  $\text{C}_{38}\text{H}_{37}\text{ClNO}_4$   $[\text{M} + \text{H}]^+$ : 606.2406, found 606.2408; HPLC conditions for determination of enantiomeric excess: Chiral AD-H,  $\lambda = 217$  nm, hexane : isopropanol = 80:20, flow rate = 1.0 mL/min,  $t_{\text{major}} = 6.4$  min.

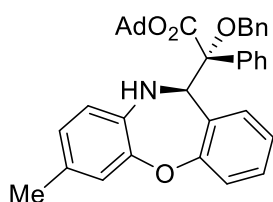

**(3R)-Adamantan-1-yl (2R)-2-(benzyloxy)-2-((R)-7-methyl-10,11-dihydrodibenzo [b,f][1,4]oxazepin-11-yl)-2-phenylacetate (5i)** White solid, 49.7 mg, 85% yield, >

20:1 *dr*, 99% *ee*, mp = 173 - 175 °C; <sup>1</sup>H NMR (500 MHz, CDCl<sub>3</sub>) δ 7.43 – 7.40 (m, 2H), 7.36 – 7.33 (comp, 4H), 7.32 – 7.26 (m, 3H), 7.25 – 7.21 (m, 2H), 7.20 – 7.15 (m, 1H), 7.02 – 6.93 (m, 2H), 6.74 (d, *J* = 1.4 Hz, 1H), 6.67 – 6.62 (m, 1H), 6.52 (d, *J* = 8.0 Hz, 1H), 5.29 (s, 1H), 4.85 (d, *J* = 11.9 Hz, 1H), 4.47 (d, *J* = 12.0 Hz, 1H), 4.32 (s, 1H), 2.17 (s, 3H), 2.15 – 2.12 (m, 3H), 2.09 – 2.02 (comp, 6H), 1.66 – 1.62 (comp, 6H); <sup>13</sup>C NMR (125 MHz, CDCl<sub>3</sub>) δ 170.0, 157.9, 146.1, 139.1, 136.2, 135.3, 131.0, 129.3, 129.14, 129.10, 128.8, 128.4, 128.1, 127.5, 127.3, 127.1, 125.0, 123.4, 121.9, 120.5, 119.4, 88.2, 83.3, 67.9, 64.8, 41.4, 36.2, 31.0, 20.4; HRMS (TOF MS ESI<sup>+</sup>) calculated for C<sub>39</sub>H<sub>40</sub>NO<sub>4</sub> [M + H]<sup>+</sup>: 586.2952, found 586.2951; HPLC conditions for determination of enantiomeric excess: Chiral AD-H, λ = 254 nm, hexane : isopropanol = 80:20, flow rate = 1.0 mL/min, *t*<sub>major</sub> = 6.3 min.

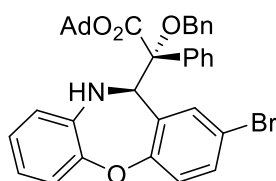

**(3R)-Adamantan-1-yl (2R)-2-(benzyloxy)-2-((R)-2-bromo-10,11-dihydrodibenzo [b,f][1,4]oxazepin-11-yl)-2-phenylacetate (5j)** White solid, 55.3 mg, 85% yield, > 20:1 *dr*, 99% *ee*, [ $\alpha$ ]<sub>D</sub><sup>20</sup> = - 3.5° (c = 0.30, DCM), mp = 131 - 133 °C; <sup>1</sup>H NMR (400 MHz, CDCl<sub>3</sub>) δ 7.57 – 7.53 (m, 1H), 7.41 – 7.30 (comp, 9H), 7.26 – 7.22 (m, 2H), 6.93 – 6.80 (m, 3H), 6.67 – 6.55 (m, 2H), 5.24 (d, *J* = 7.1 Hz, 1H), 4.84 (d, *J* = 12.0 Hz, 1H), 4.52 (d, *J* = 12.1 Hz, 1H), 4.40 (d, *J* = 7.1 Hz, 1H), 2.22 – 2.16 (m, 3H), 2.15 – 2.04 (comp, 6H), 1.78 – 1.63 (comp, 6H); <sup>13</sup>C NMR (125 MHz, CDCl<sub>3</sub>) δ 169.7, 156.9, 145.6, 138.7, 137.6, 135.4, 134.0, 132.0, 130.9, 128.6, 128.5, 128.3, 127.6, 127.4, 127.0, 124.7, 122.4, 121.4, 119.5, 119.3, 115.9, 88.1, 83.7, 67.9, 64.5, 41.5, 36.2, 31.0; HRMS (TOF MS ESI<sup>+</sup>) calculated for C<sub>38</sub>H<sub>37</sub>BrNO<sub>4</sub> [M + H]<sup>+</sup>: 650.1900, found 650.1895; HPLC conditions for determination of enantiomeric excess: Chiral AD-H, λ = 254 nm, hexane : isopropanol = 98:2, flow rate = 1.0 mL/min, *t*<sub>major</sub> = 13.4 min.

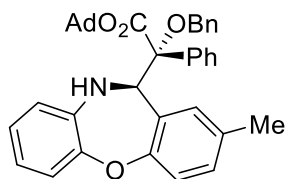

**(3R)-Adamantan-1-yl (2R)-2-(benzyloxy)-2-((R)-2-methyl-10,11-dihydrodibenzo [b,f][1,4]oxazepin-11-yl)-2-phenylacetate (5k)** White solid, 48.0 mg, 82% yield, > 20:1 *dr*, 99% *ee*,  $[\alpha]_D^{20} = -10.1^\circ$  ( $c = 0.30$ , DCM),  $mp = 138 - 140^\circ\text{C}$ ;  $^1\text{H NMR}$  (500 MHz,  $\text{CDCl}_3$ )  $\delta$  7.39 – 7.34 (comp, 6H), 7.32 – 7.28 (m, 2H), 7.25 – 7.20 (m, 2H), 7.14 – 7.10 (m, 1H), 6.99 (d,  $J = 8.0$  Hz, 1H), 6.90 – 6.85 (m, 2H), 6.83 – 6.79 (m, 1H), 6.62 – 6.56 (m, 2H), 5.23 (d,  $J = 4.6$  Hz, 1H), 4.82 (d,  $J = 12.1$  Hz, 1H), 4.52 (d,  $J = 12.0$  Hz, 1H), 4.44 (s, 1H), 2.23 (s, 3H), 2.19 – 2.15 (m, 3H), 2.13 – 2.07 (comp, 6H), 1.68 – 1.64 (comp, 6H);  $^{13}\text{C NMR}$  (125 MHz,  $\text{CDCl}_3$ )  $\delta$  170.0, 155.8, 146.2, 139.0, 138.1, 135.9, 132.6, 132.1, 129.7, 128.7, 128.4, 128.1, 128.0, 127.4, 127.3, 127.0, 124.4, 121.4, 120.2, 119.1, 119.0, 88.2, 83.3, 67.7, 65.0, 41.4, 36.2, 31.0, 20.8; HRMS (TOF MS ESI<sup>+</sup>) calculated for  $\text{C}_{39}\text{H}_{40}\text{NO}_4$   $[\text{M} + \text{H}]^+$ : 586.2952, found 586.2958; HPLC conditions for determination of enantiomeric excess: Chiral AD-H,  $\lambda = 254$  nm, hexane : isopropanol = 90:10, flow rate = 1.0 mL/min,  $t_{\text{major}} = 4.8$  min.

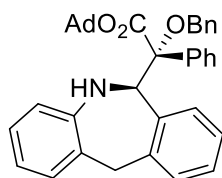

**(3R)-Adamantan-1-yl (2R)-2-(benzyloxy)-2-((R)-6,11-dihydro-5H-dibenzo [b,e]azepin-6-yl)-2-phenylacetate (5l)** White solid, 53.5 mg, 94% yield, > 20:1 *dr*, 95% *ee*,  $[\alpha]_D^{20} = -92.4^\circ$  ( $c = 0.30$ , DCM),  $mp = 132 - 134^\circ\text{C}$ ;  $^1\text{H NMR}$  (400 MHz,  $\text{CDCl}_3$ )  $\delta$  7.45 – 7.40 (m, 1H), 7.38 – 7.28 (comp, 8H), 7.25 – 7.20 (m, 2H), 7.14 – 7.05 (m, 2H), 7.00 – 6.94 (m, 2H), 6.89 (d,  $J = 7.2$  Hz, 1H), 6.71 – 6.64 (m, 2H), 5.42 (d,  $J = 7.4$  Hz, 1H), 4.85 (d,  $J = 12.1$  Hz, 1H), 4.51 (d,  $J = 12.2$  Hz, 1H), 4.51 (s, 1H), 3.31 (d,  $J = 13.9$  Hz, 1H), 3.14 (d,  $J = 13.9$  Hz, 1H), 2.23 – 2.18 (m, 3H), 2.17 – 2.11 (comp, 6H), 1.73 – 1.66 (comp, 6H);  $^{13}\text{C NMR}$  (125 MHz,  $\text{CDCl}_3$ )  $\delta$  170.1, 144.8, 141.2, 139.0, 135.9, 134.1, 131.21, 131.16, 129.5, 128.6, 128.4, 128.2, 127.8, 127.5,

127.3, 127.2, 127.0, 125.7, 122.8, 120.1, 119.8, 88.4, 83.4, 67.8, 65.9, 41.5, 39.1, 36.2, 31.0; HRMS (TOF MS ESI<sup>+</sup>) calculated for C<sub>39</sub>H<sub>40</sub>NO<sub>3</sub> [M + H]<sup>+</sup>: 570.3003, found 570.3002; HPLC conditions for determination of enantiomeric excess: Chiral IA, λ = 254 nm, hexane : isopropanol = 98:2, flow rate = 1.0 mL/min, *t*<sub>major</sub> = 5.0 min, *t*<sub>minor</sub> = 7.8 min.

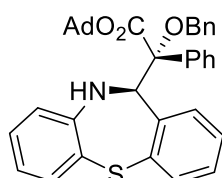

**(3R)-Adamantan-1-yl (2R)-2-(benzyloxy)-2-((R)-10,11-dihydrodibenzo[*b,f*][1,4]thiazepin-11-yl)-2-phenylacetate (5m)** White solid, 55.8 mg, 95% yield, > 20:1 *dr*, 99% *ee*, [α]<sub>D</sub><sup>20</sup> = - 82.8° (c = 0.30, DCM), mp = 153 – 155 °C; <sup>1</sup>H NMR (500 MHz, CDCl<sub>3</sub>) δ 8.12 – 7.99 (m, 1H), 7.89 – 7.76 (m, 2H), 7.59 – 7.50 (m, 1H), 7.47 – 7.36 (comp, 6H), 7.37 – 7.27 (m, 3H), 7.25 – 7.22 (m, 1H), 7.12 – 7.08 (m, 1H), 6.90 – 6.82 (m, 1H), 6.78 (d, *J* = 9.2 Hz, 1H), 6.55 – 6.48 (m, 1H), 6.44 – 6.36 (m, 1H), 5.39 (d, *J* = 11.7 Hz, 1H), 4.45 (d, *J* = 11.8 Hz, 1H), 4.41 (s, 1H), 2.10 – 2.04 (m, 3H), 1.95 – 1.88 (m, 3H), 1.77 – 1.71 (m, 3H), 1.61 – 1.54 (comp, 6H); <sup>13</sup>C NMR (125 MHz, CDCl<sub>3</sub>) δ 170.6, 145.5, 145.2, 139.2, 137.2, 135.5, 132.7, 131.9, 129.2, 128.7, 128.6, 128.4, 128.3, 128.2, 128.0, 127.54, 127.46, 125.9, 119.4, 118.6, 117.1, 86.4, 83.1, 68.5, 60.9, 41.1, 36.1, 30.9; HRMS (TOF MS ESI<sup>+</sup>) calculated for C<sub>38</sub>H<sub>38</sub>NO<sub>3</sub>S [M + H]<sup>+</sup>: 588.2567, found 588.2574; HPLC conditions for determination of enantiomeric excess: Chiral IA, λ = 304 nm, hexane : isopropanol = 98:2, flow rate = 1.0 mL/min, *t*<sub>major</sub> = 4.5 min.

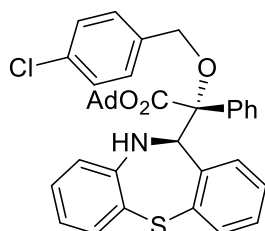

**(3R)-Adamantan-1-yl (2R)-2-((4-chlorobenzyl)oxy)-2-((R)-10,11-dihydrodibenzo[*b,f*][1,4]thiazepin-11-yl)-2-phenylacetate (5n)** White solid, 59.0 mg, 95% yield, > 20:1 *dr*, 93% *ee*, [α]<sub>D</sub><sup>20</sup> = - 58° (c = 0.30, DCM), mp = 114 – 116 °C; <sup>1</sup>H NMR (500

MHz, CDCl<sub>3</sub>) δ 8.03 – 7.96 (m, 1H), 7.81 – 7.75 (m, 2H), 7.54 – 7.50 (m, 1H), 7.44 – 7.33 (comp, 7H), 7.31 – 7.27 (m, 1H), 7.25 – 7.21 (m, 1H), 7.11 – 7.06 (m, 1H), 6.89 – 6.84 (m, 1H), 6.75 (d, *J* = 9.3 Hz, 1H), 6.55 – 6.49 (m, 1H), 6.44 – 6.38 (m, 1H), 5.29 (d, *J* = 11.8 Hz, 1H), 4.37 (d, *J* = 11.8 Hz, 1H), 4.33 (d, *J* = 9.8 Hz, 1H), 2.09 – 2.01 (m, 3H), 1.92 – 1.83 (m, 3H), 1.74 – 1.66 (m, 3H), 1.57 – 1.52 (comp, 6H); <sup>13</sup>C NMR (125 MHz, CDCl<sub>3</sub>) (δ, ppm) δ 170.5, 145.4, 145.2, 137.6, 137.1, 135.5, 133.3, 132.7, 132.0, 129.2, 128.9, 128.83, 128.81 128.80, 128.4, 128.2, 128.1, 125.7, 119.5, 118.7, 117.2, 86.5, 83.2, 67.9, 60.8, 41.1, 36.1, 30.9; HRMS (TOF MS ESI<sup>+</sup>) calculated for C<sub>38</sub>H<sub>37</sub>ClNO<sub>3</sub>S [M + H]<sup>+</sup>: 622.2177, found 622.2185; HPLC conditions for determination of enantiomeric excess: Chiral IA, λ = 312 nm, hexane : isopropanol = 95:5, flow rate = 1.0 mL/min, *t*<sub>major</sub> = 4.0 min, *t*<sub>minor</sub> = 5.2 min.

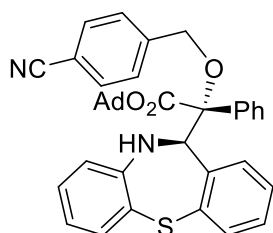

**(3R)-Adamantan-1-yl (2R)-2-((4-cyanobenzyl)oxy)-2-((R)-10,11-dihydrodibenzo [b,f][1,4]thiazepin-11-yl)-2-phenylacetate (5o)** White solid, 57.5 mg, 94% yield, > 20:1 *dr*, 99% *ee*, [α]<sub>D</sub><sup>20</sup> = - 56.2° (c = 0.31, DCM), mp = 126 – 128°C; <sup>1</sup>H NMR (400 MHz, CDCl<sub>3</sub>) δ 7.99 – 7.92 (m, 1H), 7.80 – 7.75 (m, 2H), 7.71 – 7.65 (m, 2H), 7.56 – 7.50 (m, 3H), 7.42 – 7.37 (m, 3H), 7.31 – 7.27 (m, 1H), 7.25 – 7.22 (m, 1H), 7.12 – 7.08 (m, 1H), 6.91 – 6.84 (m, 1H), 6.77 (d, *J* = 9.3 Hz, 1H), 6.58 – 6.51 (m, 1H), 6.47 – 6.41 (m, 1H), 5.37 (d, *J* = 12.9 Hz, 1H), 4.47 (d, *J* = 12.9 Hz, 1H), 4.30 (d, *J* = 9.5 Hz, 1H), 2.08 – 2.02 (m, 3H), 1.91 – 1.83 (m, 3H), 1.73 – 1.66 (m, 3H), 1.59 – 1.51 (comp, 6H); <sup>13</sup>C NMR (100 MHz, CDCl<sub>3</sub>) δ 170.4, 145.2, 145.1, 144.6, 136.8, 135.5, 132.7, 132.5, 132.1, 129.2, 129.0, 128.5, 128.3, 128.23, 128.20, 127.7, 125.5, 119.6, 119.01, 119.00, 117.4, 111.3, 86.6, 83.5, 67.8, 60.8, 41.1, 36.1, 30.9; HRMS (TOF MS ESI<sup>+</sup>) calculated for C<sub>39</sub>H<sub>37</sub>N<sub>2</sub>O<sub>3</sub>S [M + H]<sup>+</sup>: 613.2519, found 613.2525; HPLC conditions for determination of enantiomeric excess: Chiral IA, λ = 254 nm, hexane : isopropanol = 95:5, flow rate = 1.0 mL/min, *t*<sub>major</sub> = 6.8 min.

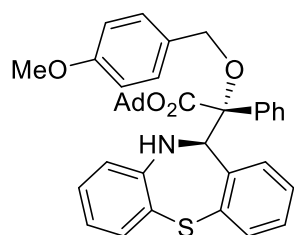

**(3R)-Adamantan-1-yl (2R)-2-((R)-10,11-dihydrodibenzo[*b,f*][1,4]thiazepin-11-yl)-2-((4-methoxybenzyl)oxy)-2-phenylacetate (5p)** White solid, 58.6 mg, 95% yield, > 20:1 *dr*, 99% *ee*,  $[\alpha]_D^{20} = -69.8^\circ$  ( $c = 0.31$ , DCM), mp = 120 – 122 °C;  $^1\text{H NMR}$  (400 MHz,  $\text{CDCl}_3$ )  $\delta$  8.07 – 7.99 (m, 1H), 7.85 – 7.78 (m, 2H), 7.54 – 7.48 (m, 1H), 7.43 – 7.34 (comp, 5H), 7.31 – 7.27 (m, 1H), 7.25 – 7.19 (m, 1H), 7.11 – 7.06 (m, 1H), 6.95 – 6.90 (m, 2H), 6.88 – 6.82 (m, 1H), 6.75 (d,  $J = 10.1$  Hz, 1H), 6.57 – 6.45 (m, 1H), 6.42 – 6.33 (m, 1H), 5.29 (d,  $J = 11.1$  Hz, 1H), 4.39 (d,  $J = 10.1$  Hz, 1H), 4.34 (d,  $J = 11.2$  Hz, 1H), 3.83 (s, 3H), 2.09 – 2.02 (m, 3H), 1.95 – 1.83 (m, 3H), 1.78 – 1.67 (m, 3H), 1.63 – 1.49 (comp, 6H);  $^{13}\text{C NMR}$  (125 MHz,  $\text{CDCl}_3$ )  $\delta$  170.7, 159.2, 145.5, 145.2, 137.4, 135.5, 132.7, 131.9, 131.3, 129.2, 128.7, 128.4, 128.3, 128.2, 128.0, 125.9, 119.4, 118.5, 117.0, 113.98, 113.95, 86.3, 83.0, 68.2, 60.8, 55.4, 41.1, 36.1, 30.9; HRMS (TOF MS ESI<sup>+</sup>) calculated for  $\text{C}_{39}\text{H}_{40}\text{NO}_4\text{S}$   $[\text{M} + \text{H}]^+$ : 618.2673, found 618.2681; HPLC conditions for determination of enantiomeric excess: Chiral IA,  $\lambda = 254$  nm, hexane : isopropanol = 95:5, flow rate = 1.0 mL/min,  $t_{\text{major}} = 4.4$  min.

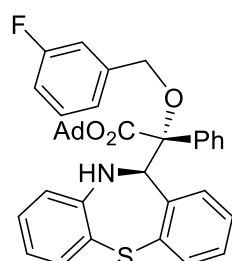

**(3R)-Adamantan-1-yl (2R)-2-((R)-10,11-dihydrodibenzo[*b,f*][1,4]thiazepin-11-yl)-2-((3-fluorobenzyl)oxy)-2-phenylacetate (5q)** White solid, 55.7 mg, 92% yield, > 20:1 *dr*, 93% *ee*, mp = 130 – 132 °C;  $^1\text{H NMR}$  (400 MHz,  $\text{CDCl}_3$ )  $\delta$  8.03 – 7.99 (m, 1H), 7.82 – 7.75 (m, 2H), 7.59 – 7.47 (m, 1H), 7.44 – 7.37 (m, 3H), 7.35 – 7.28 (m, 2H), 7.26 – 7.19 (m, 1H), 7.19 – 7.12 (m, 2H), 7.12 – 7.08 (m, 1H), 7.02 – 6.97 (m, 1H), 6.90 – 6.83 (m, 1H), 6.76 (d,  $J = 9.5$  Hz, 1H), 6.55 – 6.49 (m, 1H), 6.44 – 6.41



(m, 1H), 5.33 (d,  $J = 12.1$  Hz, 1H), 4.41 (d,  $J = 12.1$  Hz, 1H), 4.36 (d,  $J = 9.8$  Hz, 1H), 2.09 – 2.02 (m, 3H), 1.93 – 1.86 (m, 3H), 1.75 – 1.69 (m, 3H), 1.59 – 1.52 (comp, 6H);  $^{13}\text{C}$  NMR (125 MHz,  $\text{CDCl}_3$ )  $\delta$  170.5, 163.1 (d,  $J = 245.7$  Hz), 145.3 (d,  $J = 21.4$  Hz), 141.8 (d,  $J = 7.3$  Hz), 137.0, 135.5, 132.7, 132.0, 130.1, 130.0, 129.3, 128.8, 128.4, 128.3, 128.2, 128.1, 125.7, 122.9 (d,  $J = 2.7$  Hz), 119.6, 118.8, 117.2, 114.5 (d,  $J = 10.9$  Hz), 114.2 (d,  $J = 11.5$  Hz), 86.5, 83.3, 67.9, 60.8, 41.1, 36.1, 30.9;  $^{19}\text{F}$  NMR (376 MHz,  $\text{CDCl}_3$ )  $\delta$  -113.1; HRMS (TOF MS  $\text{ESI}^+$ ) calculated for  $\text{C}_{38}\text{H}_{37}\text{FNO}_3\text{S}$  [ $\text{M} + \text{H}$ ] $^+$ : 606.2473, found 606.2479; HPLC conditions for determination of enantiomeric excess: Chiral IA,  $\lambda = 310$  nm, hexane : isopropanol = 98:2, flow rate = 0.3 mL/min,  $t_{\text{major}} = 14.5$  min,  $t_{\text{minor}} = 15.8$  min.

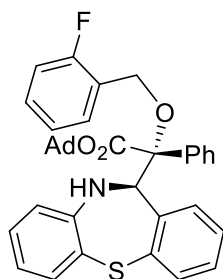

**(3R)-Adamantan-1-yl (2R)-2-((R)-10,11-dihydrodibenzo[*b,f*][1,4]thiazepin-11-yl)-2-((2-fluorobenzyl)oxy)-2-phenylacetate (5r)** White solid, 54.5 mg, 90% yield, > 20:1 *dr*, 99% *ee*,  $[\alpha]_{\text{D}}^{20} = -25.9^\circ$  ( $c = 0.42$ , DCM),  $\text{mp} = 130 - 132$  °C;  $^1\text{H}$  NMR (400 MHz,  $\text{CDCl}_3$ )  $\delta$  8.03 – 7.97 (m, 1H), 7.87 – 7.81 (m, 2H), 7.58 – 7.48 (m, 2H), 7.45 – 7.37 (m, 3H), 7.34 – 7.27 (m, 2H), 7.25 – 7.15 (m, 2H), 7.12 – 7.04 (m, 2H), 6.91 – 6.83 (m, 1H), 6.79 (d,  $J = 9.8$  Hz, 1H), 6.56 – 6.47 (m, 1H), 6.47 – 6.40 (m, 1H), 5.35 (d,  $J = 11.7$  Hz, 1H), 4.55 (d,  $J = 11.6$  Hz, 1H), 4.45 (d,  $J = 10.0$  Hz, 1H), 2.10 – 2.02 (m, 3H), 1.94 – 1.85 (m, 3H), 1.76 – 1.67 (m, 3H), 1.61 – 1.53 (comp, 6H).  $^{13}\text{C}$  NMR (125 MHz,  $\text{CDCl}_3$ )  $\delta$  170.6, 160.9 (d,  $J = 247.1$  Hz), 145.3 (d,  $J = 26.0$  Hz), 136.9, 135.5, 132.7, 131.9, 130.01, 130.0, 129.4 (d,  $J = 8.2$  Hz), 129.2, 128.8, 128.42, 128.40, 128.2, 128.0, 126.1 (d,  $J = 14.5$  Hz), 125.8, 124.3 (d,  $J = 3.4$  Hz), 119.3, 118.5, 116.9, 115.5 (d,  $J = 21.4$  Hz), 86.3, 83.1, 62.8 (d,  $J = 3.6$  Hz), 60.8, 41.1, 36.1, 30.9;  $^{19}\text{F}$  NMR (376 MHz,  $\text{CDCl}_3$ )  $\delta$  -118.0. HRMS (TOF MS  $\text{ESI}^+$ ) calculated for  $\text{C}_{38}\text{H}_{37}\text{FNO}_3\text{S}$  [ $\text{M} + \text{H}$ ] $^+$ : 606.2473, found 606.2481; HPLC conditions for

determination of enantiomeric excess: Chiral IA,  $\lambda = 330$  nm, hexane : ethanol = 95:5, flow rate = 0.3 mL/min,  $t_{\text{major}} = 13.0$  min.

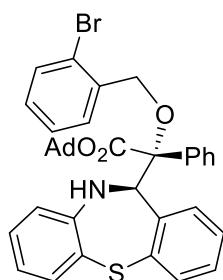

**(3R)-Adamantan-1-yl (2R)-2-((2-bromobenzyl)oxy)-2-((R)-10,11-dihydrodibenzo [b,f][1,4]thiazepin-11-yl)-2-phenylacetate (5s)** White solid, 36.6 mg, 55% yield, > 20:1 *dr*, 97% *ee*, mp = 130 – 132 °C;  $^1\text{H}$  NMR (500 MHz,  $\text{CDCl}_3$ )  $\delta$  8.02 – 7.95 (m, 1H), 7.86 – 7.80 (m, 2H), 7.63 – 7.60 (m, 1H), 7.55 (d,  $J = 7.9$  Hz, 1H), 7.52 – 7.50 (m, 1H), 7.44 – 7.37 (m, 3H), 7.36 – 7.32 (m, 1H), 7.27 – 7.22 (m, 2H), 7.19 – 7.14 (m, 1H), 7.10 – 7.07 (m, 1H), 6.90 – 6.83 (m, 1H), 6.81 (d,  $J = 9.5$  Hz, 1H), 6.53 – 6.47 (m, 1H), 6.43 (d,  $J = 8.1$  Hz, 1H), 5.31 (d,  $J = 12.2$  Hz, 1H), 4.54 (d,  $J = 9.9$  Hz, 1H), 4.51 (d,  $J = 12.2$  Hz, 1H), 2.06 – 2.02 (m, 3H), 1.92 – 1.85 (m, 3H), 1.74 – 1.68 (m, 3H), 1.58 – 1.51 (comp, 6H);  $^{13}\text{C}$  NMR (100 MHz,  $\text{CDCl}_3$ )  $\delta$  170.5, 145.5, 145.1, 138.4, 136.8, 135.6, 132.8, 132.7, 131.9, 129.6, 129.2, 129.1, 128.9, 128.39, 128.38, 128.2, 128.0, 127.7, 125.9, 123.2, 119.2, 118.5, 117.0, 86.3, 83.1, 68.1, 60.9, 41.1, 36.1, 30.9; HRMS (TOF MS ESI<sup>+</sup>) calculated for  $\text{C}_{38}\text{H}_{37}\text{BrNO}_3\text{S}$  [ $\text{M} + \text{H}$ ]<sup>+</sup>: 666.1672, found 666.1678; HPLC conditions for determination of enantiomeric excess: Chiral IF-3,  $\lambda = 254$  nm, hexane : isopropanol = 98:2, flow rate = 1.0 mL/min,  $t_{\text{major}} = 4.9$  min,  $t_{\text{minor}} = 4.6$  min.

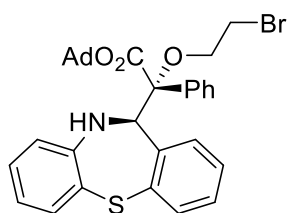

**(3R)-Adamantan-1-yl (2R)-2-(2-bromoethoxy)-2-((R)-10,11-dihydrodibenzo [b,f][1,4]thiazepin-11-yl)-2-phenylacetate (5t)** White solid, 30.2 mg, 50% yield, >

20:1 *dr*, 99% *ee*, mp = 130 – 132 °C; <sup>1</sup>H NMR (400 MHz, CDCl<sub>3</sub>) δ 7.96 (d, *J* = 7.5 Hz, 1H), 7.87 – 7.80 (m, 2H), 7.53 (d, *J* = 7.3 Hz, 1H), 7.45 – 7.37 (m, 3H), 7.35 – 7.28 (m, 1H), 7.27 – 7.20 (m, 1H), 7.10 (d, *J* = 7.4 Hz, 1H), 6.99 – 6.87 (m, 1H), 6.77 (d, *J* = 9.6 Hz, 1H), 6.58 – 6.49 (m, 2H), 4.61 (d, *J* = 9.9 Hz, 1H), 4.52 – 4.45 (m, 1H), 3.75 – 3.67 (m, 2H), 3.67 – 3.58 (m, 1H), 2.10 – 2.01 (m, 3H), 1.88 – 1.79 (m, 3H), 1.73 – 1.63 (m, 3H), 1.61 – 1.48 (comp, 6H); <sup>13</sup>C NMR (100 MHz, CDCl<sub>3</sub>) δ 170.6, 145.4, 145.1, 136.8, 135.5, 132.8, 131.9, 129.2, 128.9, 128.5, 128.4, 128.3, 128.0, 125.6, 119.5, 118.5, 116.8, 86.0, 83.2, 66.1, 60.6, 41.0, 36.1, 32.4, 30.8; HRMS (TOF MS ESI<sup>+</sup>) calculated for C<sub>33</sub>H<sub>35</sub>BrNO<sub>3</sub>S [M + H]<sup>+</sup>: 604.1516, found 604.1513; HPLC conditions for determination of enantiomeric excess: Chiral IA, λ = 254 nm, hexane : isopropanol = 95:5, flow rate = 1.0 mL/min, *t*<sub>major</sub> = 4.5 min.

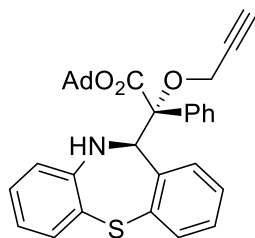

**(3R)-Adamantan-1-yl (2R)-2-((R)-10,11-dihydrodibenzo[*b,f*][1,4]thiazepin-11-yl)-2-phenyl-2-(prop-2-yn-1-yloxy)acetate (5u)** White solid, 21.4 mg, 40% yield, > 20:1 *dr*, 99% *ee*, [α]<sub>D</sub><sup>20</sup> = - 73.8° (c = 0.30, DCM), mp = 130 – 132 °C; <sup>1</sup>H NMR (400 MHz, CDCl<sub>3</sub>) (δ, ppm) δ 7.95 (d, *J* = 7.2 Hz, 1H), 7.78 (d, *J* = 7.4 Hz, 2H), 7.51 (d, *J* = 6.8 Hz, 1H), 7.44 – 7.35 (m, 3H), 7.33 – 7.27 (m, 1H), 7.25 – 7.19 (m, 1H), 7.09 – 7.04 (m, 1H), 6.90 – 6.82 (m, 1H), 6.65 (d, *J* = 10.1 Hz, 1H), 6.52 – 6.44 (m, 2H), 4.90 (dd, *J* = 15.5, 2.3 Hz, 1H), 4.36 (d, *J* = 10.2 Hz, 1H), 4.18 (dd, *J* = 15.5, 2.4 Hz, 1H), 2.51 (t, *J* = 2.3 Hz, 1H), 2.08 – 2.02 (m, 3H), 1.92 – 1.84 (m, 3H), 1.75 – 1.68 (m, 3H), 1.59 – 1.52 (comp, 6H); <sup>13</sup>C NMR (100 MHz, CDCl<sub>3</sub>) (δ, ppm) δ 170.0, 145.5, 145.1, 136.6, 135.5, 132.7, 131.9, 129.2, 128.9, 128.5, 128.2, 128.1, 128.0, 125.7, 119.5, 118.5, 116.9, 87.2, 83.5, 80.9, 74.2, 60.8, 55.7, 41.1, 36.1, 30.9; HRMS (TOF MS ESI<sup>+</sup>) calculated for C<sub>34</sub>H<sub>34</sub>NO<sub>3</sub>S [M + H]<sup>+</sup>: 536.2254, found 536.2246; HPLC conditions for determination of enantiomeric excess: Chiral IF-3, λ = 254 nm, hexane : isopropanol = 95:5, flow rate = 1.0 mL/min, *t*<sub>major</sub> = 4.4 min.

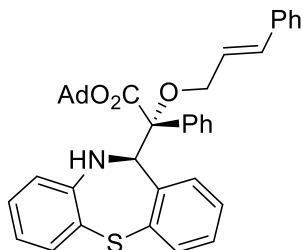

**(3R)-Adamantan-1-yl (2R)-2-(cinnamyloxy)-2-((R)-10,11-dihydrodibenzo[*b,f*][1,4]thiazepin-11-yl)-2-phenylacetate (5v)** Colorless oil, 52.1 mg, 85% yield, > 20:1 *dr*, 99% *ee*;  $^1\text{H}$  NMR (500 MHz,  $\text{CDCl}_3$ )  $\delta$  8.06 – 7.97 (m, 1H), 7.83 – 7.73 (m, 2H), 7.53 – 7.49 (m, 1H), 7.45 – 7.37 (comp, 5H), 7.36 – 7.28 (m, 3H), 7.27 (d,  $J = 1.2$  Hz, 1H), 7.24 – 7.20 (m, 1H), 7.10 – 7.04 (m, 1H), 6.90 – 6.84 (m, 1H), 6.73 – 6.62 (m, 2H), 6.53 – 6.42 (m, 3H), 4.92 – 4.84 (m, 1H), 4.41 (d,  $J = 9.9$  Hz, 1H), 4.16 – 4.08 (m, 1H), 2.07 – 2.00 (m, 3H), 1.92 – 1.85 (m, 3H), 1.75 – 1.67 (m, 3H), 1.62 – 1.49 (comp, 6H);  $^{13}\text{C}$  NMR (125 MHz,  $\text{CDCl}_3$ )  $\delta$  170.5, 145.6, 145.3, 137.4, 137.2, 137.0, 135.6, 132.7, 131.9, 131.7, 129.2, 128.73, 128.7, 128.3, 128.2, 128.0, 127.8, 127.0, 126.7, 125.9, 119.4, 118.5, 117.0, 86.4, 83.1, 68.0, 60.9, 41.1, 36.1, 30.9; HRMS (TOF MS ESI<sup>+</sup>) calculated for  $\text{C}_{40}\text{H}_{40}\text{NO}_3\text{S}$  [ $\text{M} + \text{H}$ ]<sup>+</sup>: 614.2723, found 614.2722; HPLC conditions for determination of enantiomeric excess: Chiral IF-3,  $\lambda = 254$  nm, hexane : isopropanol = 98:2, flow rate = 1.0 mL/min,  $t_{\text{major}} = 5.6$  min.

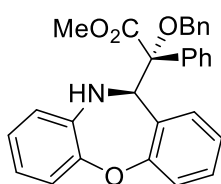

**Methyl (R)-2-(benzyloxy)-2-((R)-10,11-dihydrodibenzo[*b,f*][1,4]oxazepin-11-yl)-2-phenylacetate (5w)** Colorless oil, 38.3 mg, 85% yield, 2 : 1 *dr*, 98% (99%) *ee*;  $^1\text{H}$  NMR (500 MHz,  $\text{CDCl}_3$ )  $\delta$  major: 7.39 – 7.36 (m, 2H), 7.35 – 7.31 (comp, 4H), 7.30 – 7.26 (m, 2H), 7.25 – 7.20 (m, 2H), 7.18 – 7.13 (m, 1H), 7.01 (d,  $J = 8.1$  Hz, 1H), 6.91 (d,  $J = 8.2$  Hz, 1H), 6.88 – 6.80 (m, 3H), 6.64 – 6.57 (m, 2H), 5.05 (s, 1H), 4.62 (d,  $J = 11.8$  Hz, 1H), 4.62 (s, 1H), 4.45 (d,  $J = 11.8$  Hz, 1H), 3.65 (s, 3H); minor: 7.40 – 7.35 (m, 2H), 7.30 – 7.20 (comp, 8H), 7.19 – 7.15 (m, 1H), 7.14 – 7.09 (m, 1H), 6.99 – 6.95 (m, 1H), 6.85 – 6.80 (m, 1H), 6.80 – 6.74 (m, 1H), 6.72 – 6.67 (m, 1H),

6.65 – 6.58 (m, 1H), 6.58 – 6.53 (m, 1H), 5.18 (s, 1H), 4.87 (d,  $J = 11.8$  Hz, 1H), 4.56 (s, 1H), 4.50 (d,  $J = 11.9$  Hz, 1H), 3.78 (s, 3H).  $^{13}\text{C}$  NMR (125 MHz,  $\text{CDCl}_3$ )  $\delta$  major: 171.5, 157.7, 145.5, 138.5, 137.7, 135.8, 131.8, 129.6, 128.6, 128.4, 128.3, 127.7, 127.5, 127.2, 126.9, 124.5, 123.1, 121.2, 120.8, 119.2, 119.0, 88.5, 68.0, 67.8, 52.2; minor: 172.5, 157.9, 145.2, 139.1, 137.8, 137.0, 131.9, 129.6, 128.23, 128.20, 128.12, 128.10, 127.6, 127.2, 126.9, 124.5, 123.1, 121.4, 121.1, 119.0, 118.4, 89.3, 69.2, 67.3, 52.5. HRMS (TOF MS  $\text{ESI}^+$ ) calculated for  $\text{C}_{29}\text{H}_{26}\text{NO}_4$   $[\text{M} + \text{H}]^+$ : 452.1862, found 452.1860; HPLC conditions for determination of enantiomeric excess: Chiral AD-H,  $\lambda = 254$  nm, hexane : isopropanol = 90:10, flow rate = 1.0 mL/min,  $t_{\text{major}} = 7.3$  min,  $t_{\text{minor}} = 13.3$  min.

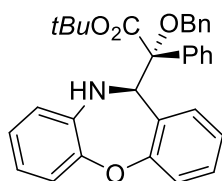

**tert-Butyl (R)-2-(benzyloxy)-2-((R)-10,11-dihydrodibenzo[*b,f*][1,4]oxazepin-11-yl)-2-phenylacetate (5x)** Colorless oil, 38.9 mg, 79% yield, > 20:1 *dr*, 86% *ee*;  $^1\text{H}$  NMR (500 MHz,  $\text{CDCl}_3$ )  $\delta$  7.33 (d,  $J = 7.7$  Hz, 2H), 7.27 – 7.25 (m, 3H), 7.24 – 7.20 (m, 3H), 7.19 – 7.09 (comp, 4H), 6.94 (d,  $J = 8.0$  Hz, 1H), 6.91 – 6.86 (m, 1H), 6.83 (d,  $J = 7.8$  Hz, 1H), 6.77 – 6.73 (m, 1H), 6.56 – 6.50 (m, 2H), 5.23 (s, 1H), 4.78 (d,  $J = 12.1$  Hz, 1H), 4.44 (d,  $J = 12.1$  Hz, 1H), 4.37 (s, 1H), 1.34 (s, 9H).  $^{13}\text{C}$  NMR (125 MHz,  $\text{CDCl}_3$ )  $\delta$  170.3, 157.9, 145.9, 139.0, 138.0, 136.1, 131.1, 129.3, 129.0, 128.7, 128.4, 128.2, 127.6, 127.3, 127.0, 124.5, 123.5, 121.5, 120.7, 119.22, 119.15, 88.3, 83.2, 67.9, 64.9, 28.1. HRMS (TOF MS  $\text{ESI}^+$ ) calculated for  $\text{C}_{32}\text{H}_{32}\text{NO}_4$   $[\text{M} + \text{H}]^+$ : 494.2331, found 494.2335; HPLC conditions for determination of enantiomeric excess: Chiral AD-H,  $\lambda = 254$  nm, hexane : isopropanol = 80:20, flow rate = 1.0 mL/min,  $t_{\text{major}} = 4.4$  min,  $t_{\text{minor}} = 5.8$  min.

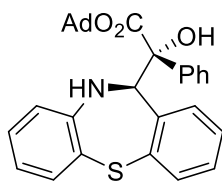

**(3S,5S,7S)-Adamantan-1-yl (R)-2-((R)-10,11-dihydrodibenzo[*b,f*][1,4]thiazepine-11-yl)-2-hydroxy-2-phenylacetate (5y)** Colourless oil, 55.1 mg, 55% yield, > 20:1 *dr*, 77% *ee*;  $^1\text{H NMR}$  (400 MHz,  $\text{CDCl}_3$ )  $\delta$  7.26 – 7.23 (m, 2H), 7.21 – 7.16 (m, 2H), 7.08 – 7.04 (m, 1H), 7.01 – 6.96 (m, 1H), 6.94 – 6.89 (m, 1H), 6.62 – 6.58 (m, 1H), 6.49 – 6.44 (m, 1H), 4.72 (s, 1H), 4.27 (d,  $J = 9.2$  Hz, 1H), 2.13 – 2.09 (m, 3H), 2.03 – 2.01 (comp, 6H), 1.60 – 1.57 (comp, 6H);  $^{13}\text{C NMR}$  (100 MHz,  $\text{CDCl}_3$ )  $\delta$  173.8, 145.8, 142.6, 139.5, 136.4, 132.6, 132.1, 128.7, 128.3, 128.2, 127.9, 127.7, 126.1, 119.8, 119.7, 119.1, 117.3, 84.3, 81.1, 58.5, 41.0, 36.0, 31.0; HRMS (TOF MS  $\text{ESI}^+$ ) calculated for  $\text{C}_{31}\text{H}_{32}\text{NO}_3\text{S}$  [ $\text{M} + \text{H}$ ] $^+$ : 498.2025, found 498.2031; HPLC conditions for determination of enantiomeric excess: Chiral IC,  $\lambda = 254$  nm, hexane : isopropanol = 70:30, flow rate = 1.0 mL/min,  $t_{\text{major}} = 3.7$  min,  $t_{\text{minor}} = 4.4$  min.

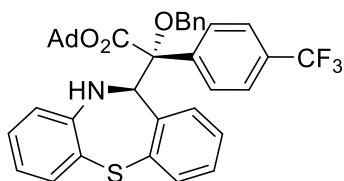

**(3R)-Adamantan-1-yl (2R)-2-(benzyloxy)-2-((R)-10,11-dihydrodibenzo[*b,f*][1,4]thiazepin-11-yl)-2-(4-(trifluoromethyl)phenyl)acetate (6a)** White solid, 55.7 mg, 85% yield, > 20:1 *dr*, 99% *ee*,  $[\alpha]_{\text{D}}^{20} = -85.7^\circ$  ( $c = 0.30$ , DCM), mp = 113 – 115  $^\circ\text{C}$ ;  $^1\text{H NMR}$  (500 MHz,  $\text{CDCl}_3$ )  $\delta$  8.04 – 7.98 (m, 1H), 7.92 (d,  $J = 8.3$  Hz, 2H), 7.69 – 7.61 (m, 2H), 7.55 – 7.48 (m, 1H), 7.45 – 7.37 (comp, 4H), 7.36 – 7.27 (m, 2H), 7.25 – 7.22 (m, 1H), 7.12 – 7.04 (m, 1H), 6.93 – 6.84 (m, 1H), 6.67 (d,  $J = 10.3$  Hz, 1H), 6.59 – 6.51 (m, 1H), 6.48 – 6.39 (m, 1H), 5.39 (d,  $J = 11.7$  Hz, 1H), 4.40 (d,  $J = 11.7$  Hz, 1H), 4.31 (d,  $J = 10.4$  Hz, 1H), 2.13 – 2.01 (m, 3H), 1.99 – 1.87 (m, 3H), 1.79 – 1.69 (m, 3H), 1.64 – 1.49 (comp, 6H);  $^{13}\text{C NMR}$  (125 MHz,  $\text{CDCl}_3$ )  $\delta$  169.9, 145.2, 144.6, 141.2, 138.7, 135.7, 132.8, 130.8 (q,  $J = 32.6$  Hz), 130.4, 129.2, 128.8, 128.7, 128.3, 128.2, 127.8, 127.4, 125.9, 125.2 (q,  $J = 3.8$  Hz), 123.3 (q,  $J = 272.4$  Hz), 119.9,

119.2, 117.7, 86.3, 83.7, 68.8, 61.1, 41.1, 36.1, 30.9;  $^{19}\text{F}$  NMR (471 MHz,  $\text{CDCl}_3$ )  $\delta$  -69.7; HRMS (TOF MS  $\text{ESI}^+$ ) calculated for  $\text{C}_{39}\text{H}_{37}\text{F}_3\text{NO}_3\text{S}$   $[\text{M} + \text{H}]^+$ : 656.2441, found 656.2442; HPLC conditions for determination of enantiomeric excess: Chiral IA,  $\lambda = 300$  nm, hexane : isopropanol = 98:2, flow rate = 1.0 mL/min,  $t_{\text{major}} = 3.8$  min,  $t_{\text{minor}} = 4.6$  min.

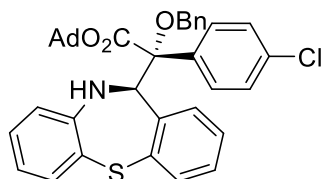

**(3R)-Adamantan-1-yl (2R)-2-(benzyloxy)-2-(4-chlorophenyl)-2-((R)-10,11-dihydrodibenzo[*b,f*][1,4]thiazepin-11-yl)acetate (6b)** White solid, 57.8 mg, 93% yield, > 20:1 *dr*, 95% *ee*,  $[\alpha]_{\text{D}}^{20} = -38.0^\circ$  ( $c = 0.30$ , DCM), mp = 130 – 132 °C;  $^1\text{H}$  NMR (500 MHz,  $\text{CDCl}_3$ )  $\delta$  8.03 – 7.98 (m, 1H), 7.76 – 7.70 (m, 2H), 7.54 – 7.49 (m, 1H), 7.42 – 7.36 (comp, 5H), 7.35 – 7.27 (m, 3H), 7.25 – 7.20 (m, 1H), 7.12 – 7.07 (m, 1H), 6.90 – 6.84 (m, 1H), 6.67 (d,  $J = 9.6$  Hz, 1H), 6.56 – 6.50 (m, 1H), 6.43 – 6.39 (m, 1H), 5.36 (d,  $J = 11.7$  Hz, 1H), 4.39 (d,  $J = 11.7$  Hz, 1H), 4.31 (d,  $J = 10.0$  Hz, 1H), 2.09 – 2.04 (m, 3H), 1.91 – 1.86 (m, 3H), 1.73 – 1.68 (m, 3H), 1.60 – 1.51 (comp, 6H);  $^{13}\text{C}$  NMR (125 MHz,  $\text{CDCl}_3$ )  $\delta$  170.2, 145.2, 144.8, 138.9, 135.8, 135.6, 134.7, 132.8, 131.9, 129.9, 129.2, 128.7, 128.4, 128.2, 128.1, 127.7, 127.5, 125.9, 119.8, 119.0, 117.5, 86.0, 83.4, 68.6, 61.0, 41.1, 36.1, 30.9; HRMS (TOF MS  $\text{ESI}^+$ ) calculated for  $\text{C}_{38}\text{H}_{37}\text{ClNO}_3\text{S}$   $[\text{M} + \text{H}]^+$ : 622.2177, found 622.2178; HPLC conditions for determination of enantiomeric excess: Chiral IA,  $\lambda = 330$  nm, hexane : isopropanol = 95:5, flow rate = 1.0 mL/min,  $t_{\text{major}} = 3.7$  min,  $t_{\text{minor}} = 4.3$  min.

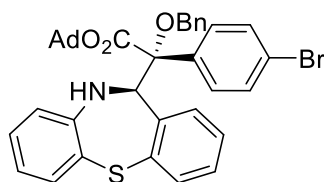

**(3R)-Adamantan-1-yl (2R)-2-(benzyloxy)-2-(4-bromophenyl)-2-((R)-10,11-dihydrodibenzo[*b,f*][1,4]thiazepin-11-yl)acetate (6c)** White solid, 63.2 mg, 95%

yield, > 20:1 *dr*, 95% *ee*,  $[\alpha]_D^{20} = -26.5^\circ$  ( $c = 0.32$ , DCM), mp = 85 – 87 °C;  $^1\text{H}$  NMR (400 MHz,  $\text{CDCl}_3$ )  $\delta$  8.08 – 7.97 (m, 1H), 7.68 (d,  $J = 8.7$  Hz, 2H), 7.53 (d,  $J = 8.5$  Hz, 3H), 7.45 – 7.36 (comp, 4H), 7.36 – 7.27 (m, 2H), 7.26 – 7.21 (m, 1H), 7.14 – 7.01 (m, 1H), 6.92 – 6.83 (m, 1H), 6.68 (d,  $J = 10.2$  Hz, 1H), 6.60 – 6.48 (m, 1H), 6.41 (s, 1H), 5.37 (d,  $J = 11.7$  Hz, 1H), 4.40 (d,  $J = 11.7$  Hz, 1H), 4.31 (d,  $J = 10.4$  Hz, 1H), 2.10 – 2.01 (m, 3H), 1.92 – 1.83 (m, 3H), 1.76 – 1.68 (m, 3H), 1.61 – 1.50 (comp, 6H);  $^{13}\text{C}$  NMR (100 MHz,  $\text{CDCl}_3$ )  $\delta$  170.2, 145.2, 144.8, 138.9, 136.3, 135.6, 132.8, 131.9, 131.4, 130.2, 129.2, 128.7, 128.2, 128.1, 127.7, 127.4, 125.9, 123.1, 119.8, 119.0, 117.5, 86.1, 83.4, 68.6, 60.9, 41.1, 36.1, 30.9; HRMS (TOF MS ESI<sup>+</sup>) calculated for  $\text{C}_{38}\text{H}_{37}\text{BrNO}_3\text{S}$   $[\text{M} + \text{H}]^+$ : 666.15672, found 666.15679; HPLC conditions for determination of enantiomeric excess: Chiral IA,  $\lambda = 300$  nm, hexane : isopropanol = 95:5, flow rate = 1.0 mL/min,  $t_{\text{major}} = 3.8$  min,  $t_{\text{minor}} = 4.4$  min.

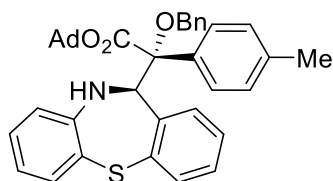

**(3R)-Adamantan-1-yl (2R)-2-(benzyloxy)-2-((R)-10,11-dihydrodibenzo[*b,f*][1,4]thiazepin-11-yl)-2-(*p*-tolyl)acetate (6d)** White solid, 56.5 mg, 94% yield, > 20:1 *dr*, 99% *ee*,  $[\alpha]_D^{20} = -52.0^\circ$  ( $c = 0.30$ , DCM), mp = 90 – 92 °C;  $^1\text{H}$  NMR (500 MHz,  $\text{CDCl}_3$ )  $\delta$  8.07 (d,  $J = 7.7$  Hz, 1H), 7.71 (d,  $J = 8.2$  Hz, 2H), 7.54 (d,  $J = 7.5$  Hz, 1H), 7.45 (d,  $J = 7.5$  Hz, 2H), 7.42 – 7.38 (m, 2H), 7.36 – 7.28 (m, 2H), 7.26 – 7.21 (m, 3H), 7.11 (d,  $J = 7.6$  Hz, 1H), 6.90 – 6.85 (m, 1H), 6.79 (d,  $J = 9.6$  Hz, 1H), 6.56 – 6.48 (m, 1H), 6.41 (d,  $J = 8.0$  Hz, 1H), 5.38 (d,  $J = 11.7$  Hz, 1H), 4.45 (d,  $J = 11.6$  Hz, 1H), 4.42 (s, 1H), 2.39 (s, 3H), 2.12 – 2.02 (m, 3H), 1.96 – 1.83 (m, 3H), 1.81 – 1.69 (m, 3H), 1.62 – 1.51 (comp, 6H);  $^{13}\text{C}$  NMR (125 MHz,  $\text{CDCl}_3$ )  $\delta$  170.8, 145.5, 145.4, 139.3, 138.5, 135.5, 134.3, 132.7, 131.9, 129.2, 129.0, 128.6, 128.3, 128.1, 128.0, 127.49, 127.45, 125.8, 119.3, 118.5, 116.9, 86.2, 82.9, 68.4, 60.9, 41.1, 36.1, 30.9, 21.2; HRMS (TOF MS ESI<sup>+</sup>) calculated for  $\text{C}_{39}\text{H}_{40}\text{NO}_3\text{S}$   $[\text{M} + \text{H}]^+$ : 602.2723, found 602.2719; HPLC conditions for determination of enantiomeric excess: Chiral IA,  $\lambda =$



310 nm, hexane : isopropanol = 95:5, flow rate = 1.0 mL/min,  $t_{\text{major}} = 3.9$  min,  $t_{\text{minor}} = 4.5$  min.

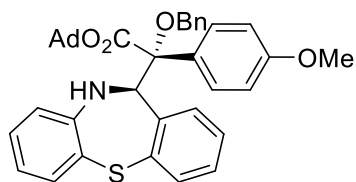

**(3R)-Adamantan-1-yl (2R)-2-(benzyloxy)-2-((R)-10,11-dihydrodibenzo[*b,f*][1,4]thiazepin-11-yl)-2-(4-methoxyphenyl)acetate (6e)** White solid, 42.0 mg, 68% yield, > 20:1 *dr*, 99% *ee*, mp = 90 – 92 °C;  $^1\text{H}$  NMR (500 MHz,  $\text{CDCl}_3$ ) ( $\delta$ , ppm)  $\delta$  8.05 – 8.00 (m, 1H), 7.73 (d,  $J = 8.9$  Hz, 2H), 7.56 – 7.49 (m, 1H), 7.45 – 7.35 (comp, 4H), 7.33 – 7.28 (m, 2H), 7.24 – 7.18 (m, 1H), 7.13 – 7.05 (m, 1H), 6.94 – 6.82 (m, 3H), 6.75 (d,  $J = 9.0$  Hz, 1H), 6.56 – 6.47 (m, 1H), 6.46 – 6.38 (m, 1H), 5.32 (d,  $J = 11.7$  Hz, 1H), 4.39 (s, 1H), 4.39 (d,  $J = 11.7$  Hz, 1H), 3.83 (s, 3H), 2.10 – 1.98 (m, 3H), 1.91 – 1.81 (m, 3H), 1.76 – 1.65 (m, 3H), 1.63 – 1.53 (comp, 6H);  $^{13}\text{C}$  NMR (125 MHz,  $\text{CDCl}_3$ ) ( $\delta$ , ppm)  $\delta$  170.9, 159.7, 145.5, 145.3, 139.3, 135.5, 132.8, 131.9, 130.8, 129.8, 129.4, 129.2, 128.6, 128.2, 128.0, 127.5, 125.9, 119.4, 118.6, 117.1, 113.6, 85.9, 82.9, 68.3, 60.9, 55.4, 41.1, 36.1, 30.9; HRMS (TOF MS  $\text{ESI}^+$ ) calculated for  $\text{C}_{39}\text{H}_{40}\text{NO}_4\text{S}$  [ $\text{M} + \text{H}$ ] $^+$ : 618.2673, found 618.2674; HPLC conditions for determination of enantiomeric excess: Chiral IA,  $\lambda = 330$  nm, hexane : isopropanol = 95:5, flow rate = 1.0 mL/min,  $t_{\text{major}} = 4.3$  min.

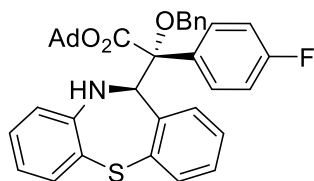

**(3R)-Adamantan-1-yl (2R)-2-(benzyloxy)-2-((R)-10,11-dihydrodibenzo[*b,f*][1,4]thiazepin-11-yl)-2-(4-fluorophenyl)acetate (6f)** White solid, 56.9 mg, 94% yield, > 20:1 *dr*, 97% *ee*,  $[\alpha]_{\text{D}}^{20} = -91.7^\circ$  ( $c = 0.37$ , DCM), mp = 116 – 118 °C;  $^1\text{H}$  NMR (500 MHz,  $\text{CDCl}_3$ )  $\delta$  8.02 (d,  $J = 7.7$  Hz, 1H), 7.82 – 7.75 (m, 2H), 7.55 – 7.49 (m, 1H), 7.44 – 7.36 (comp, 4H), 7.35 – 7.27 (m, 2H), 7.26 – 7.20 (m, 1H), 7.13 – 7.05 (m, 3H),

6.89 – 6.85 (m, 1H), 6.70 (d,  $J = 10.3$  Hz, 1H), 6.57 – 6.50 (m, 1H), 6.42 (d,  $J = 8.1$  Hz, 1H), 5.35 (d,  $J = 11.7$  Hz, 1H), 4.38 (d,  $J = 11.7$  Hz, 1H), 4.34 (d,  $J = 10.4$  Hz, 1H), 2.08 – 2.05 (m, 3H), 1.92 – 1.87 (m, 3H), 1.74 – 1.70 (m, 3H), 1.60 – 1.52 (comp, 6H);  $^{13}\text{C}$  NMR (125 MHz,  $\text{CDCl}_3$ )  $\delta$  170.5, 162.8 (d,  $J = 248.2$  Hz), 145.3, 144.9, 139.0, 135.6, 133.1 (d,  $J = 3.4$  Hz), 132.8, 131.9, 130.4 (d,  $J = 8.1$  Hz), 129.2, 128.6, 128.2, 128.1, 127.7, 127.5, 125.9, 119.7, 118.9, 117.5, 115.2 (d,  $J = 21.3$  Hz), 85.9, 83.3, 68.5, 61.0, 41.1, 36.1, 30.9;  $^{19}\text{F}$  NMR (376 MHz,  $\text{CDCl}_3$ )  $\delta$  -113.3; HRMS (TOF MS ESI<sup>+</sup>) calculated for  $\text{C}_{38}\text{H}_{37}\text{FNO}_3\text{S}$  [ $\text{M} + \text{H}$ ]<sup>+</sup>: 606.2473, found 606.2472; HPLC conditions for determination of enantiomeric excess: Chiral IA,  $\lambda = 300$  nm, hexane : isopropanol = 95:5, flow rate = 1.0 mL/min,  $t_{\text{major}} = 3.7$  min,  $t_{\text{minor}} = 4.3$  min.

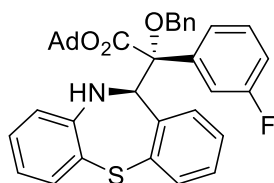

**(3R)-Adamantan-1-yl (2R)-2-(benzyloxy)-2-((R)-10,11-dihydrodibenzo[*b,f*][1,4]thiazepin-11-yl)-2-(3-fluorophenyl)acetate (6g)** White solid, 54.5 mg, 90% yield, > 20:1 *dr*, 98% *ee*,  $[\alpha]_{\text{D}}^{20} = -75.8^\circ$  ( $c = 0.30$ , DCM), mp = 88 – 90 °C;  $^1\text{H}$  NMR (500 MHz,  $\text{CDCl}_3$ )  $\delta$  8.05 – 7.99 (m, 1H), 7.62 – 7.51 (m, 3H), 7.46 – 7.40 (m, 3H), 7.39 – 7.34 (m, 2H), 7.32 – 7.21 (m, 3H), 7.14 – 7.06 (m, 2H), 6.92 – 6.84 (m, 1H), 6.71 (d,  $J = 10.1$  Hz, 1H), 6.57 – 6.51 (m, 1H), 6.46 – 6.41 (m, 1H), 5.40 (d,  $J = 11.7$  Hz, 1H), 4.43 (d,  $J = 11.6$  Hz, 1H), 4.33 (d,  $J = 10.3$  Hz, 1H), 2.09 – 2.03 (m, 3H), 1.95 – 1.86 (m, 3H), 1.79 – 1.68 (m, 3H), 1.62 – 1.51 (comp, 6H);  $^{13}\text{C}$  NMR (125 MHz,  $\text{CDCl}_3$ )  $\delta$  170.1, 162.7 (d,  $J = 245.3$  Hz), 145.3, 144.9, 139.8 (d,  $J = 6.9$  Hz), 138.9, 135.6, 132.7, 131.9, 129.6 (d,  $J = 8.1$  Hz), 129.2, 128.7, 128.3, 128.1, 127.7, 127.5, 125.9, 124.1 (d,  $J = 2.8$  Hz), 119.8, 118.9, 117.4, 115.8 (d,  $J = 23.6$  Hz), 115.7 (d,  $J = 21.1$  Hz), 86.1 (d,  $J = 1.6$  Hz), 83.5, 68.7, 61.0, 41.1, 36.1, 30.9;  $^{19}\text{F}$  NMR (376 MHz,  $\text{CDCl}_3$ )  $\delta$  -112.2; HRMS (TOF MS ESI<sup>+</sup>) calculated for  $\text{C}_{38}\text{H}_{37}\text{FNO}_3\text{S}$  [ $\text{M} + \text{H}$ ]<sup>+</sup>: 606.2473, found 606.2467; HPLC conditions for determination of enantiomeric excess: Chiral

IA,  $\lambda = 300$  nm, hexane : isopropanol = 98:2, flow rate = 1.0 mL/min,  $t_{\text{major}} = 3.9$  min,  $t_{\text{minor}} = 4.5$  min.

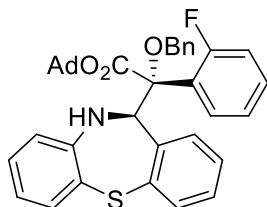

**(3R)-Adamantan-1-yl (2R)-2-(benzyloxy)-2-((R)-10,11-dihydrodibenzo[*b,f*][1,4]thiazepin-11-yl)-2-(2-fluorophenyl)acetate (6h)** White solid, 18.2 mg, 30% yield, > 20:1 *dr*, 91% *ee*, mp = 90 – 92 °C;  $^1\text{H}$  NMR (400 MHz,  $\text{CDCl}_3$ )  $\delta$  8.11 – 7.95 (m, 2H), 7.48 (d,  $J = 7.5$  Hz, 1H), 7.42 (d,  $J = 7.6$  Hz, 2H), 7.39 – 7.34 (m, 3H), 7.31 – 7.27 (m, 1H), 7.25 – 7.23 (m, 1H), 7.21 – 7.14 (m, 2H), 7.14 – 7.06 (m, 2H), 6.93 – 6.85 (m, 1H), 6.83 (d, 1H), 6.54 – 6.50 (m, 1H), 6.44 (d,  $J = 8.1$  Hz, 1H), 5.33 (d,  $J = 11.1$  Hz, 1H), 4.70 (d,  $J = 9.2$  Hz, 1H), 4.45 (d,  $J = 11.2$  Hz, 1H), 2.07 – 2.02 (m, 3H), 1.90 – 1.85 (m, 3H), 1.76 – 1.72 (m, 3H), 1.58 – 1.52 (comp, 6H);  $^{13}\text{C}$  NMR (100 MHz,  $\text{CDCl}_3$ )  $\delta$  169.5, 161.1 (d,  $J = 248.3$  Hz), 145.4, 143.4, 138.8, 135.7, 132.7, 131.9, 130.7 (d,  $J = 9.2$  Hz), 130.2 (d,  $J = 3.1$  Hz), 128.7, 128.5, 128.4, 128.0, 127.7, 127.6, 125.4, 125.3, 124.6 (d,  $J = 3.0$  Hz), 119.3, 118.7, 118.2, 116.4 (d,  $J = 25.0$  Hz), 84.3, 83.1, 68.2, 61.2, 40.9, 36.1, 30.9;  $^{19}\text{F}$  NMR (471 MHz,  $\text{CDCl}_3$ )  $\delta$  -106.4; HRMS (TOF MS ESI $^+$ ) calculated for  $\text{C}_{38}\text{H}_{37}\text{FNO}_3\text{S}$  [ $\text{M} + \text{H}$ ] $^+$ : 606.2473, found 606.2480; HPLC conditions for determination of enantiomeric excess: Chiral IA,  $\lambda = 254$  nm, hexane : isopropanol = 90:10, flow rate = 1.0 mL/min,  $t_{\text{major}} = 3.9$  min,  $t_{\text{minor}} = 4.5$  min.

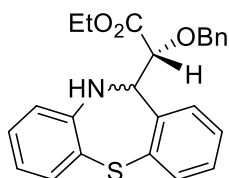

**Ethyl (2R)-2-(benzyloxy)-2-(10,11-dihydrodibenzo[*b,f*][1,4]thiazepin-11-yl)acetate (6i)** Colorless oil, 20.3 mg, 50% yield, 1.5:1 *dr*, 93%/55% *ee*;  $^1\text{H}$  NMR (500 MHz,  $\text{CDCl}_3$ )  $\delta$  major: 7.42 (d,  $J = 7.3$  Hz, 1H), 7.38 (d,  $J = 5.9$  Hz, 1H), 7.31 (d,  $J = 7.3$  Hz, 1H), 7.25 – 7.21 (m, 3H), 7.15 – 7.12 (m, 3H), 7.08 – 7.06 (m, 1H), 6.83 –

6.79 (m, 1H), 6.49 – 6.44 (m, 1H), 6.23 (d,  $J = 8.1$  Hz, 1H), 4.84 – 4.81 (m, 1H), 4.78 (d,  $J = 11.6$  Hz, 1H), 4.36 (d,  $J = 11.6$  Hz, 1H), 4.18 (s, 1H), 4.13 – 4.05 (m, 2H), 1.04 (t,  $J = 7.1$  Hz, 3H); minor: 7.52 – 7.49 (m, 1H), 7.37 (d,  $J = 7.0$  Hz, 1H), 7.35 – 7.33 (m, 2H), 7.24 (d,  $J = 2.7$  Hz, 2H), 7.20 (d,  $J = 3.9$  Hz, 1H), 6.95 (m, 1H), 6.62 (m, 1H), 6.51 (d,  $J = 8.1$  Hz, 1H), 5.59 (d,  $J = 5.3$  Hz, 1H), 4.92 (d,  $J = 6.5$  Hz, 1H), 4.82 (d,  $J = 11.1$  Hz, 1H), 4.65 (s, 1H), 4.56 (d,  $J = 11.1$  Hz, 1H), 4.14 – 4.06 (m, 1H), 1.12 (t,  $J = 7.1$  Hz, 3H);  $^{13}\text{C}$  NMR (125 MHz,  $\text{CDCl}_3$ )  $\delta$  major: 171.2, 145.9, 141.0, 137.2, 136.1, 132.6, 132.2, 128.8, 128.7, 128.6, 128.5, 128.4, 128.3, 128.2, 118.8, 118.5, 117.2, 80.5, 73.7, 61.3, 58.5, 14.2; minor: 171.0, 146.2, 141.0, 137.0, 136.5, 131.9, 131.7, 128.8, 128.7, 128.6, 128.5, 128.4, 128.3, 127.9, 119.2, 119.1, 117.6, 80.0, 73.0, 61.3, 60.2, 14.1; HRMS (TOF MS ESI<sup>+</sup>) calculated for  $\text{C}_{24}\text{H}_{24}\text{NO}_3\text{S}$  [ $\text{M} + \text{H}$ ]<sup>+</sup>: 406.1471, found 406.1465; HPLC conditions for determination of enantiomeric excess: Chiral AD-H,  $\lambda = 300$  nm, hexane : isopropanol = 80:20, flow rate = 0.5 mL/min,  $t_{\text{major}} = 23.7$  min,  $t_{\text{minor}} = 25.6$  min.

### Control Experiments:

**Synthesis of 9:** To a 10-mL oven-dried vial with a magnetic stirring bar, **2a** (21.6 mg, 0.2 mmol), and  $\text{Rh}_2(\text{esp})_2$  (0.8 mg, 1.0 mol%) in 2.0 mL DCE, a solution of **1a** (71.0 mg, 0.24 mmol) in DCE (2.0 mL) was added *via* a syringe pump over 2 h under argon atmosphere at 30 °C. Then the solvent was evaporated in vacuo, and the residue was purified by column chromatography on silica gel (Hexanes : EtOAc = 50:1) to give 60.2 mg of pure product **9** as white solid in 80% yield;  $^1\text{H}$  NMR (400 MHz,  $\text{CDCl}_3$ )  $\delta$  7.49 – 7.44 (m, 2H), 7.42 – 7.27 (comp, 8H), 4.81 (s, 1H), 4.61 (q,  $J = 11.9$  Hz, 2H), 2.16 – 2.10 (m, 3H), 2.09 – 2.01 (comp, 6H), 1.66 – 1.61 (comp, 6H);  $^{13}\text{C}$  NMR (126 MHz,  $\text{CDCl}_3$ )  $\delta$  169.8, 137.7, 137.2, 128.5, 128.52, 128.47, 128.1, 127.9, 127.4, 82.0, 80.4, 71.2, 41.3, 36.2, 31.0; HRMS (TOF MS ESI<sup>+</sup>) calculated for  $\text{C}_{25}\text{H}_{29}\text{O}_3$  [ $\text{M} + \text{H}$ ]<sup>+</sup>: 377.2117, found 377.2115.

Control reaction with **9** and **3a**:

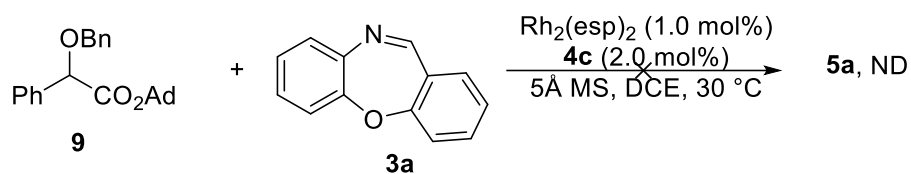

To a 10-mL oven-dried vial containing a magnetic stirring bar, **9** (37.6 mg, 0.10 mmol), **3a** (19.5 mg, 0.10 mmol), **4c** (1.7 mg, 2.0 mol%), 5Å MS (100 mg),  $\text{Rh}_2(\text{esp})_2$  (0.8 mg, 1.0 mol%), and DCE (2.0 mL) were added in sequence, and the reaction mixture was stirred at 30 °C under argon atmosphere for 10 h. Then the reaction crude mixture was subjected to proton NMR analysis in  $\text{CDCl}_3$  (see Fig. S1 for detail). All the materials were remained and no product **5a** was formed.

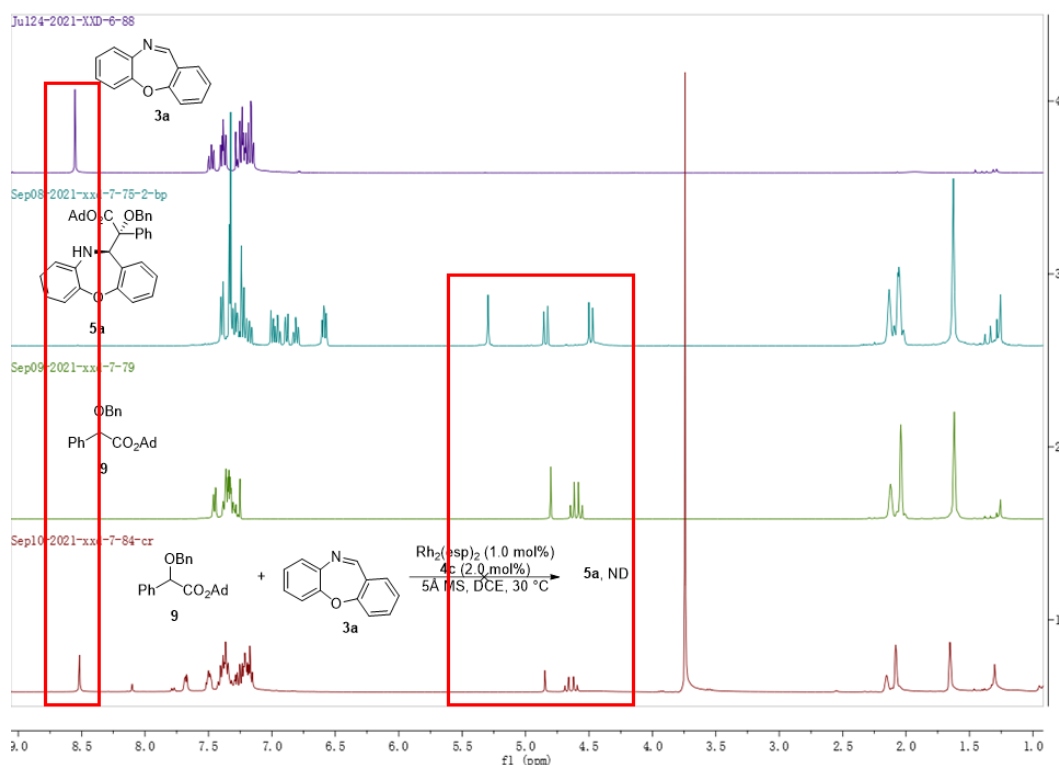



7.33 – 7.23 (comp, 4H), 7.16 (s, 1H), 6.98 – 6.88 (m, 1H), 6.72 – 6.66 (m, 1H), 6.65 – 6.60 (m, 1H), 3.99 – 3.90 (m, 1H), 3.88 – 3.77 (m, 1H), 3.23 – 3.11 (m, 2H), 1.97 – 1.89 (m, 3H), 1.65 – 1.56 (comp, 4H), 1.54 – 1.38 (comp, 8H);  $^{13}\text{C}$  NMR (126 MHz,  $\text{CDCl}_3$ )  $\delta$  169.1, 148.1, 141.0, 138.4, 136.8, 131.7, 131.6, 128.8, 128.6, 128.3, 127.9, 127.7, 127.6, 127.5, 123.0, 121.6, 120.6, 81.7, 81.1, 63.3, 56.2, 46.9, 40.6, 36.0, 30.7; HRMS (TOF MS ESI+) calculated for  $\text{C}_{33}\text{H}_{34}\text{NO}_3\text{S}$   $[\text{M} + \text{H}]^+$ : 524.2254, found 524.2258; HPLC conditions for determination of enantiomeric excess: Chiral IF-3,  $\lambda = 254$  nm, hexane : isopropanol = 98:2, flow rate = 1.0 mL/min,  $t_{\text{major}} = 23.9$  min.

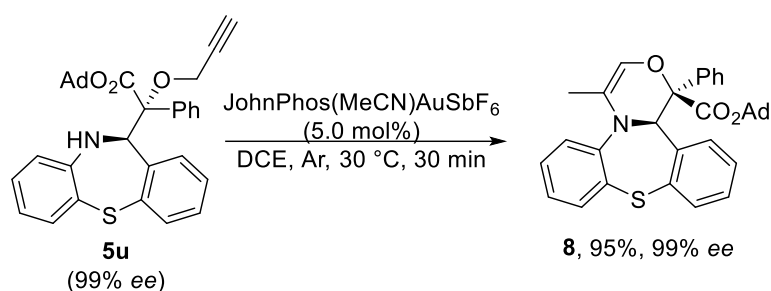

**Synthesis of 8:** To a 10-mL oven-dried vial containing a magnetic stirring bar, **5u** (53.5 mg, 0.10 mmol), JohnPhos(MeCN)AuSbF<sub>6</sub> (3.7 mg, 5.0 mol%), and DCE (2.0 mL) were added in sequence, and the reaction mixture was stirred at 30 °C under argon atmosphere for 0.5 h. When the reaction was completed (monitored by TLC), the solvent was evaporated under vacuum. The residue was purified by column chromatography on silica gel with any treatment (Hexanes : EtOAc = 50:1) to give 29.4 mg of pure product **8** as white solid in 95% yield with 99% ee, mp = 104 – 106 °C;  $^1\text{H}$  NMR (500 MHz,  $\text{CDCl}_3$ )  $\delta$  7.72 – 7.64 (m, 1H), 7.61 – 7.53 (m, 2H), 7.49 – 7.43 (m, 1H), 7.29 – 7.23 (m, 3H), 7.22 – 7.13 (m, 3H), 6.84 – 6.72 (m, 2H), 6.33 (s, 1H), 6.08 (d,  $J = 1.1$  Hz, 1H), 5.92 – 5.82 (m, 1H), 2.07 – 1.97 (m, 3H), 1.89 – 1.76 (comp, 6H), 1.58 – 1.47 (comp, 6H), 1.35 (s, 3H);  $^{13}\text{C}$  NMR (125 MHz,  $\text{CDCl}_3$ )  $\delta$  167.7, 142.6, 141.0, 137.9, 134.8, 129.7, 128.2, 128.1, 127.8, 127.2, 126.9, 126.6, 126.1, 126.0, 124.9, 122.9, 122.5, 115.2, 82.8, 81.3, 59.2, 40.9, 36.0, 30.8, 15.2; HRMS (TOF MS ESI+) calculated for  $\text{C}_{34}\text{H}_{34}\text{NO}_3\text{S}$   $[\text{M} + \text{H}]^+$ : 536.2254, found 536.2248; HPLC conditions for determination of enantiomeric excess: Chiral IF-3,  $\lambda = 266$  nm, hexane : isopropanol = 80:20, flow rate = 1.0 mL/min,  $t_{\text{major}} = 6.9$  min.

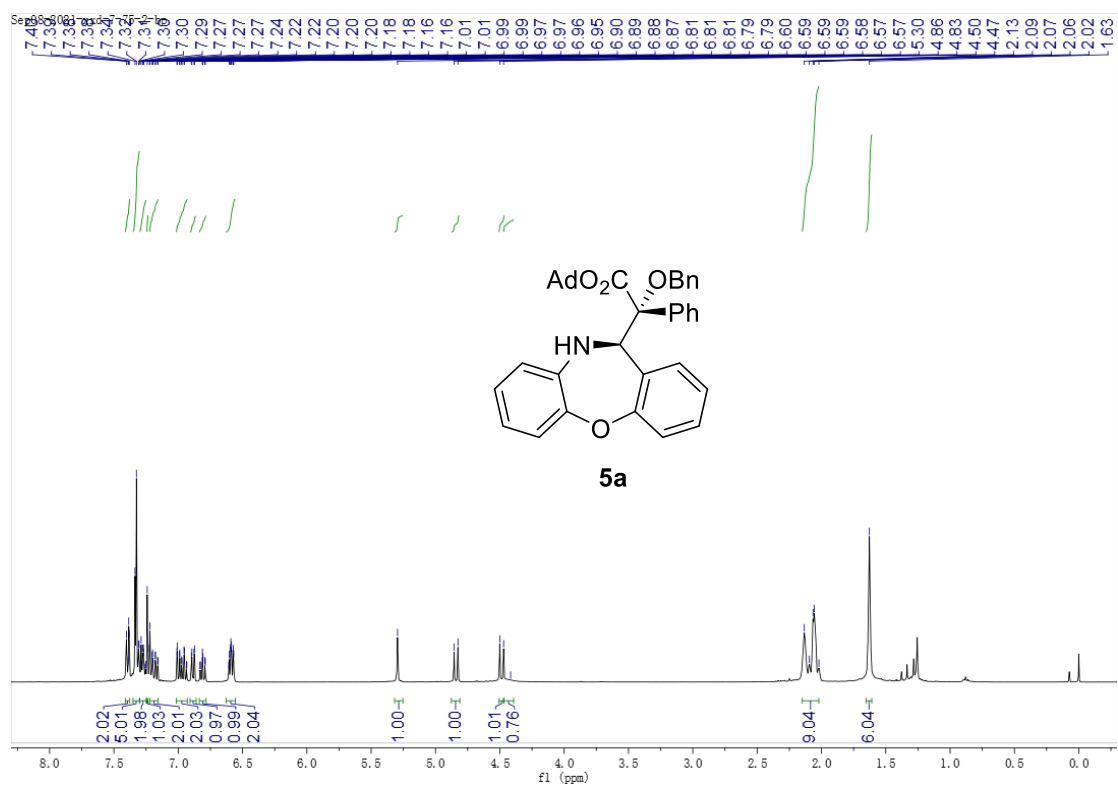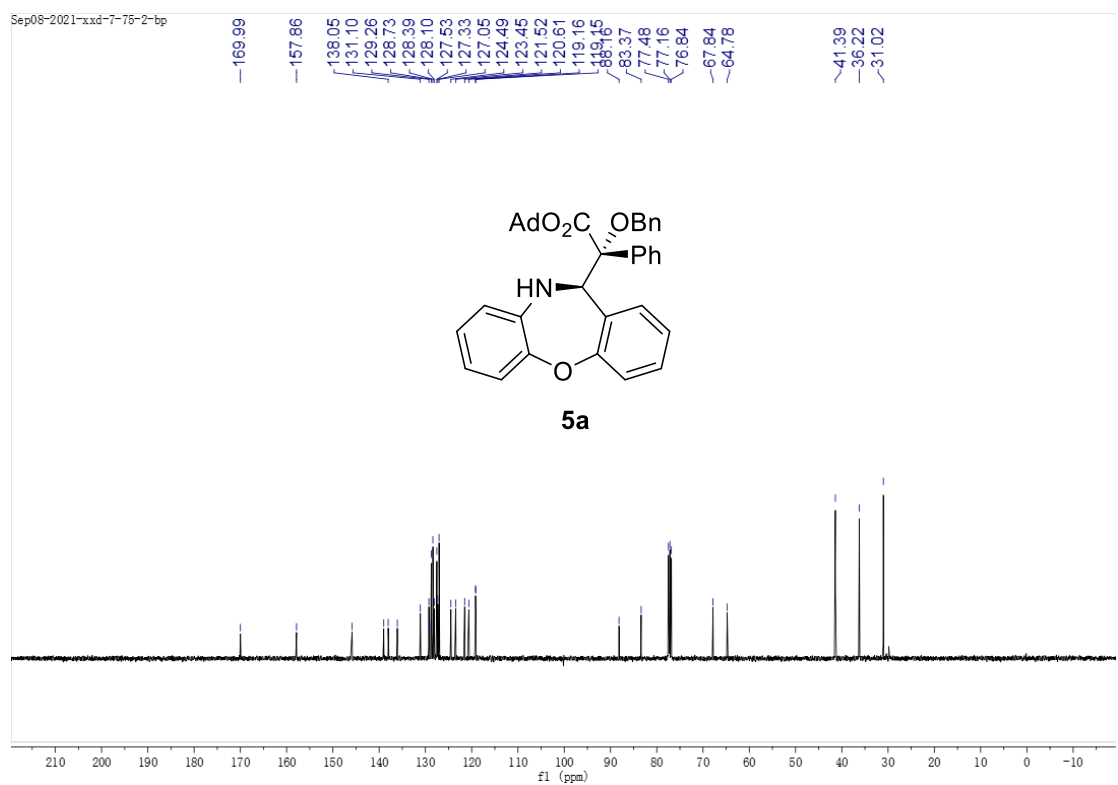



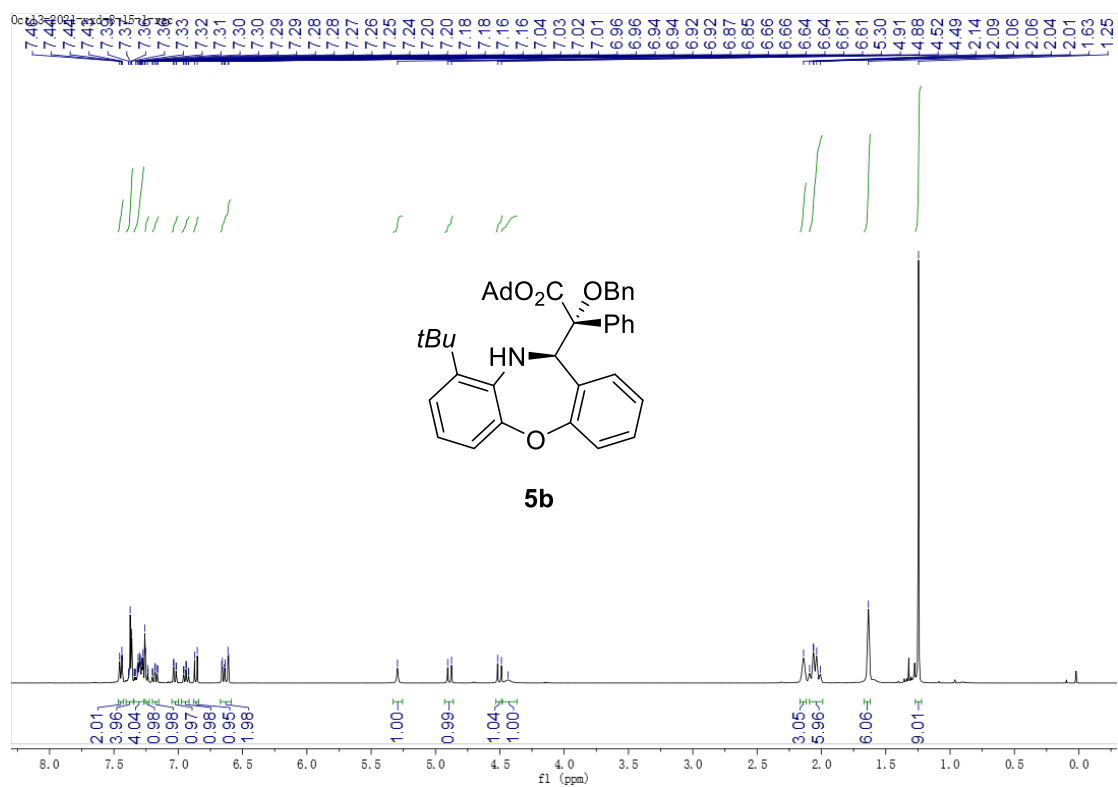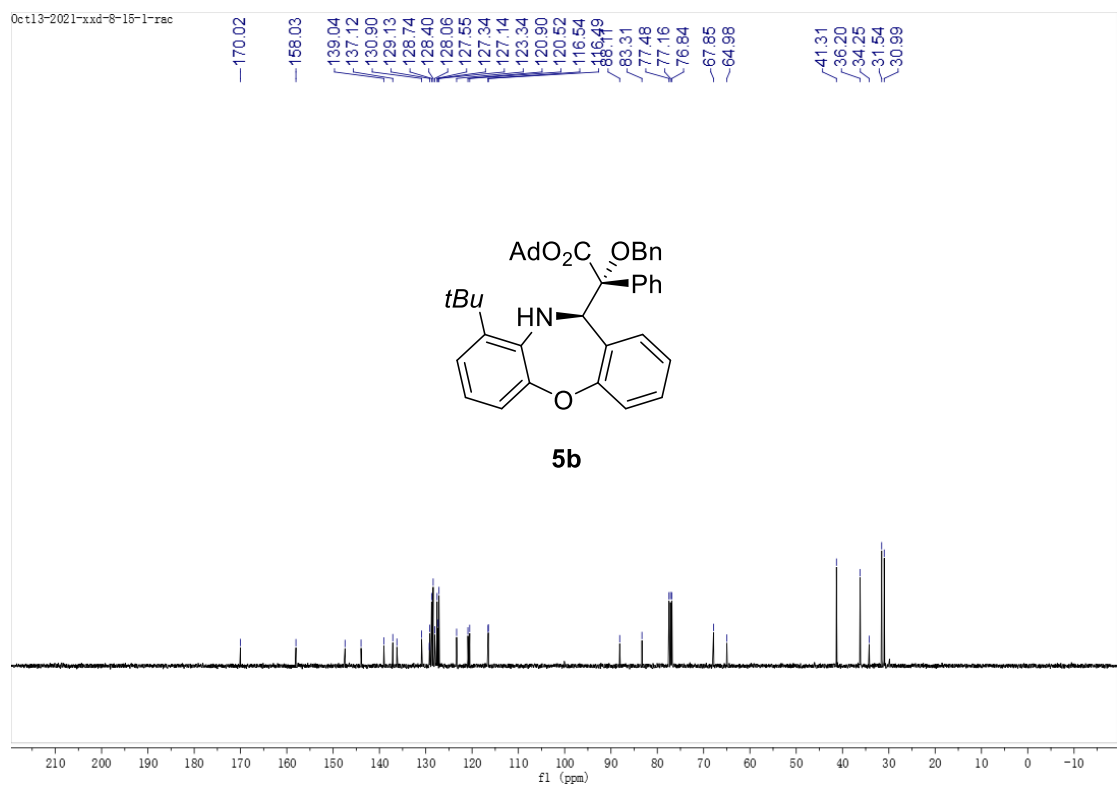



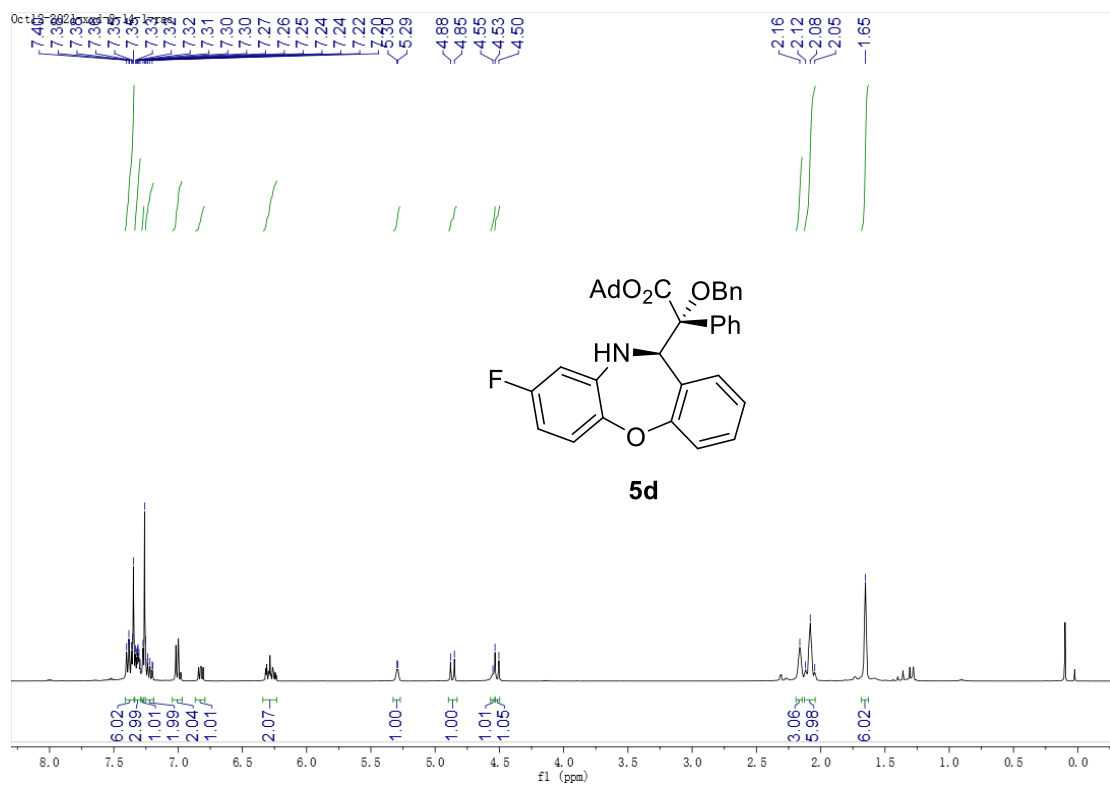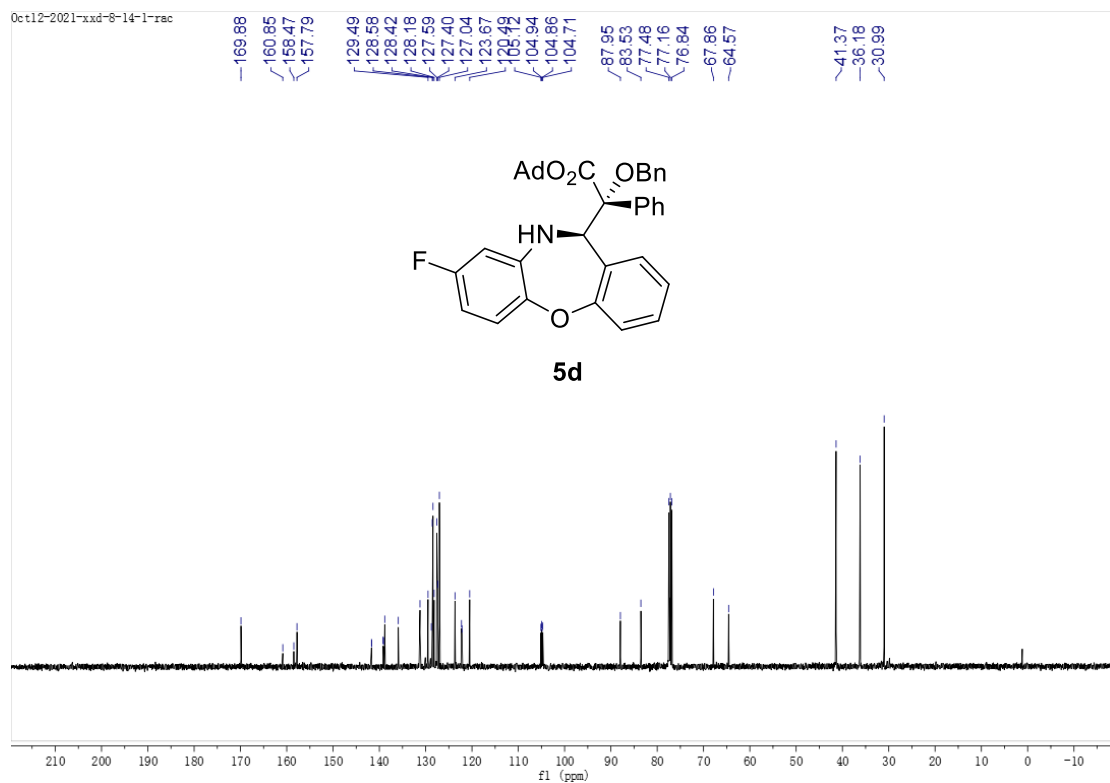



Oct11-2021-KXD-8-13-1-RAC

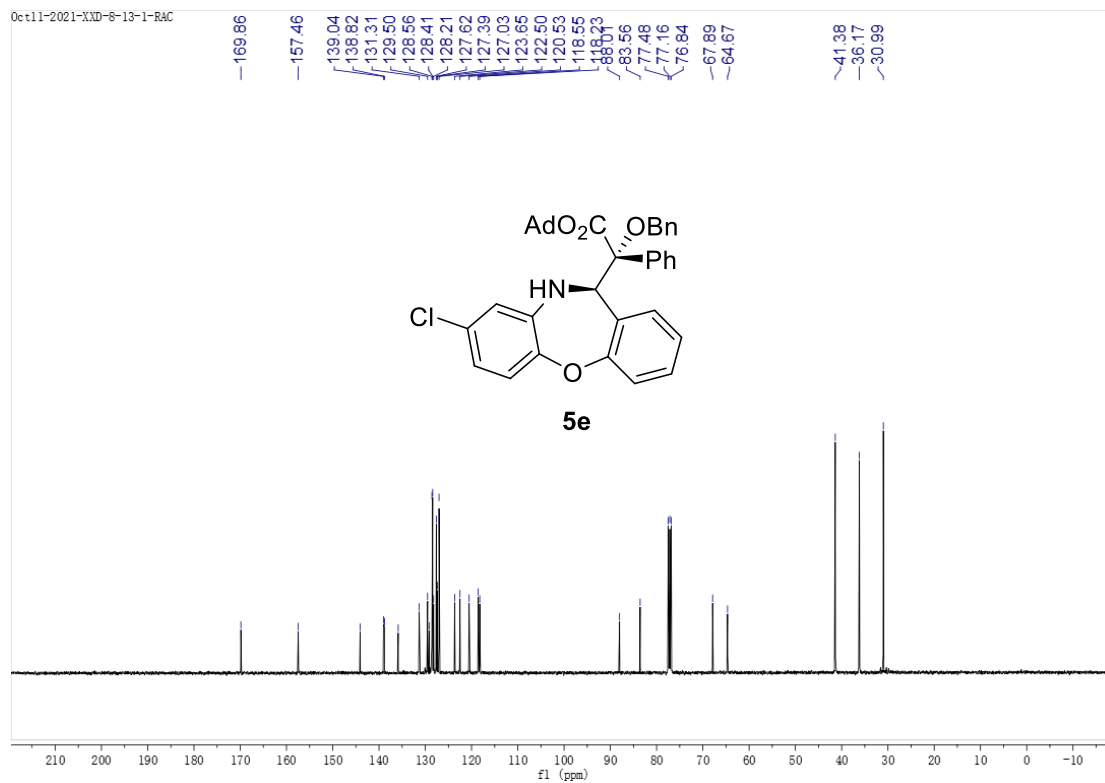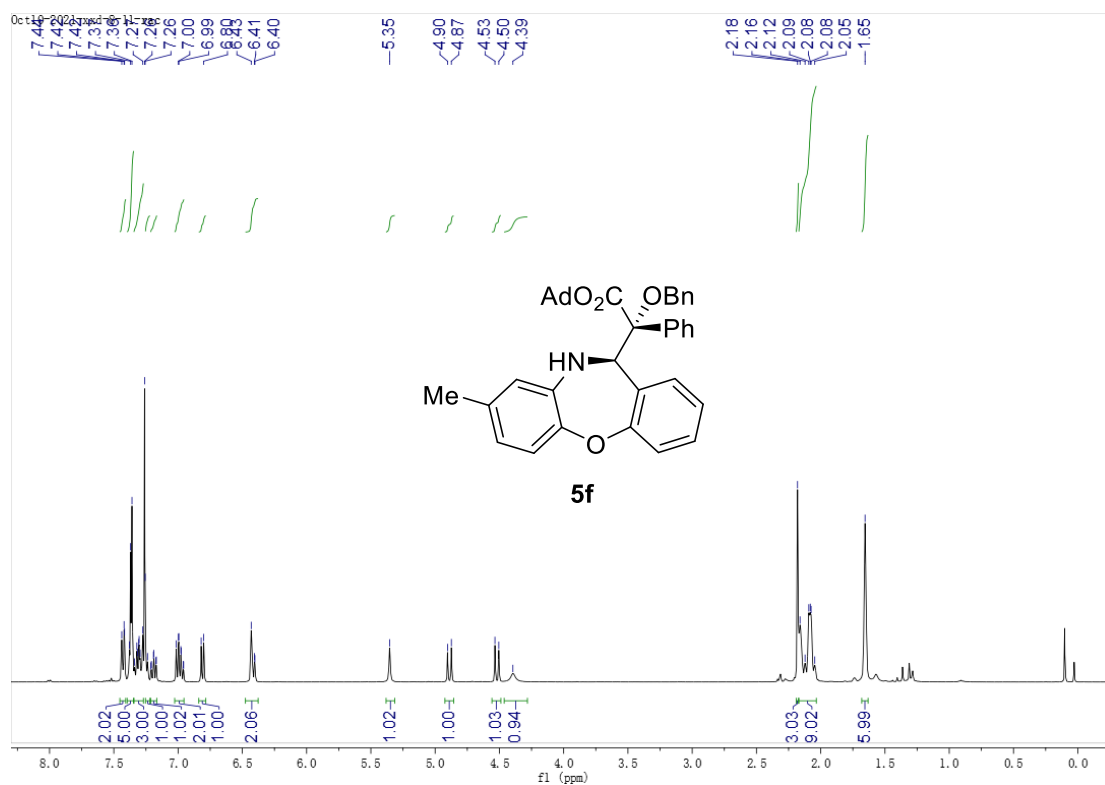

Oct10-2021-xxd-8-11-rec

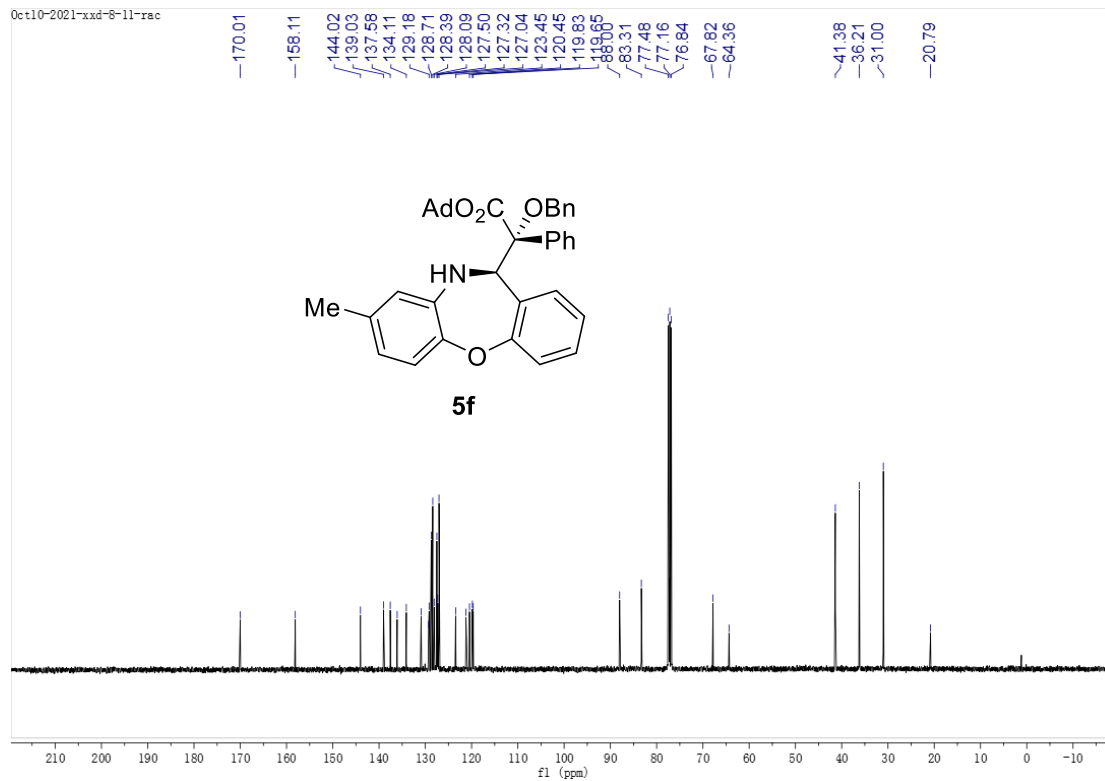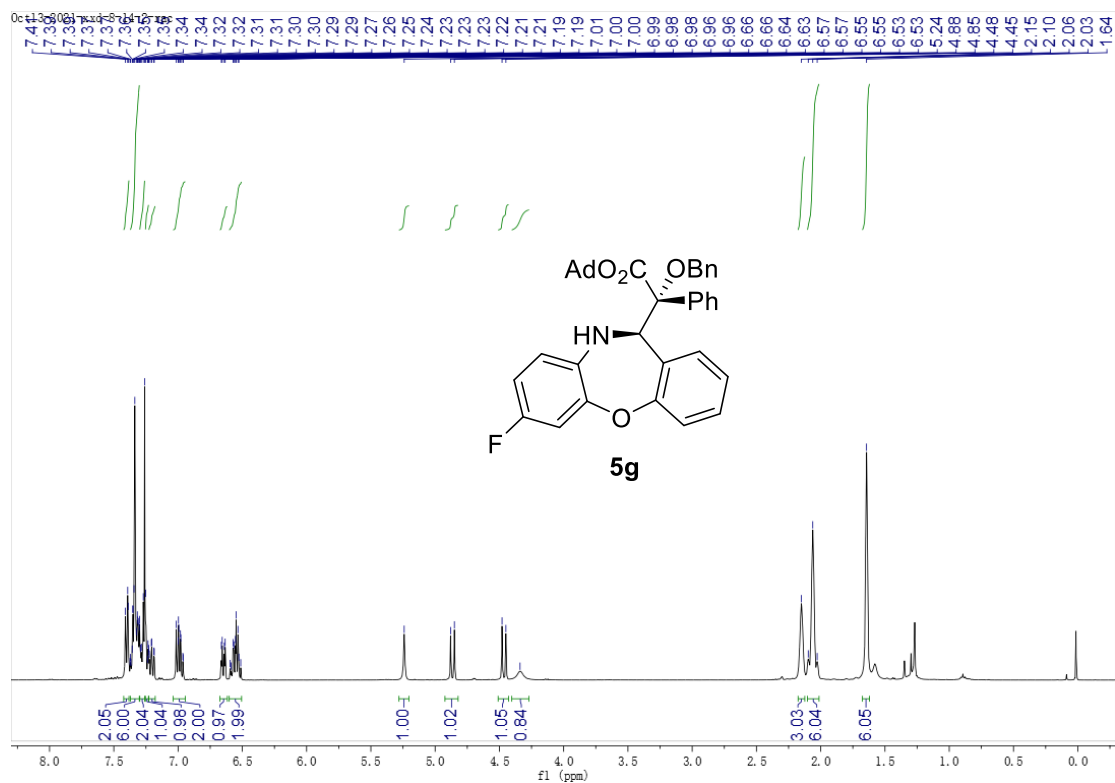

Oct13-2021-xxd-8-14-2-rec

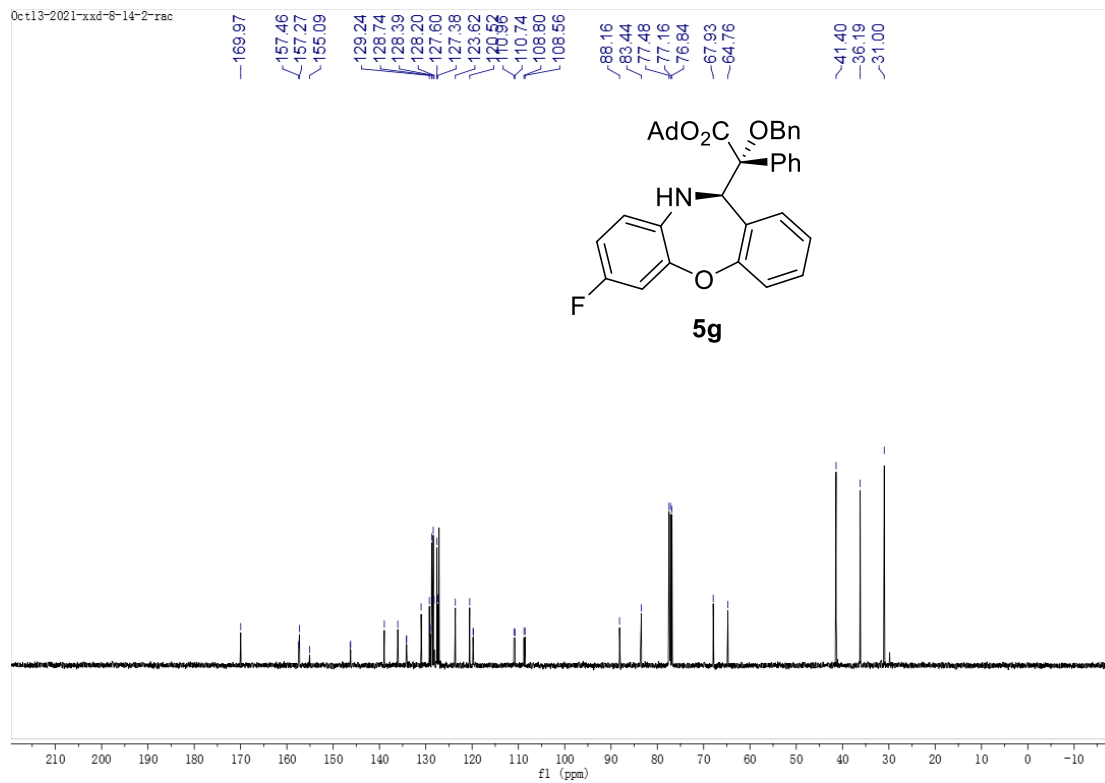

Oct13-2021-xxd-8-14-2-rec

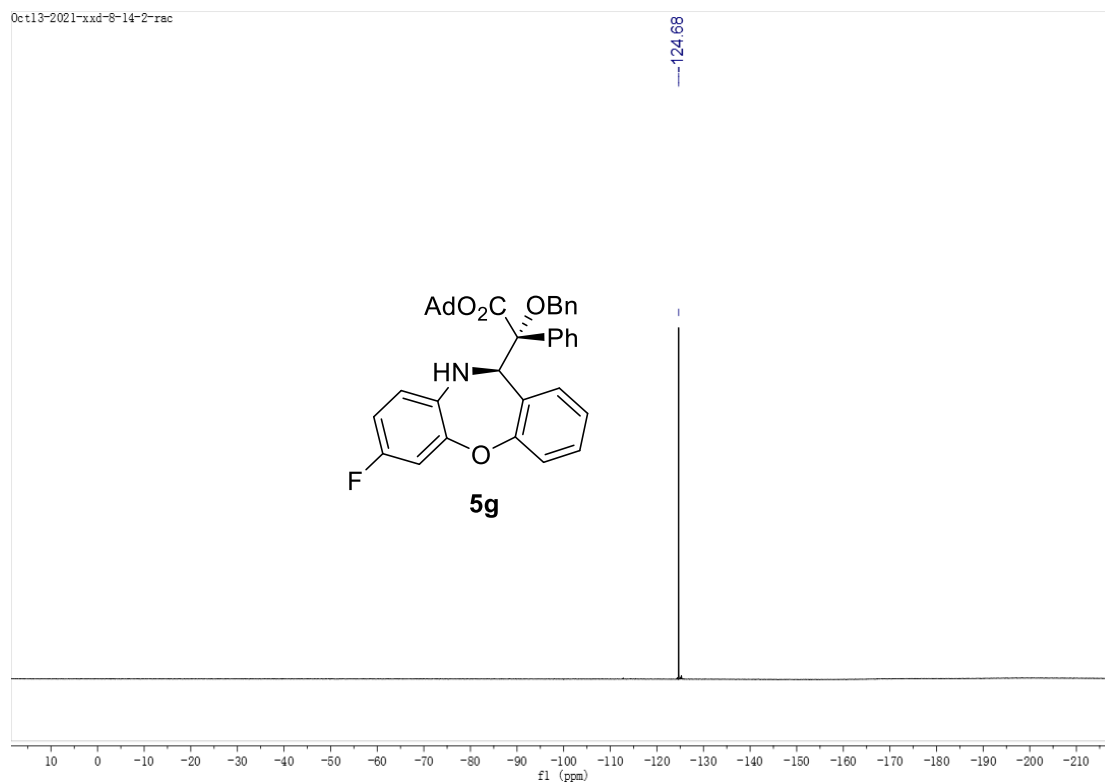

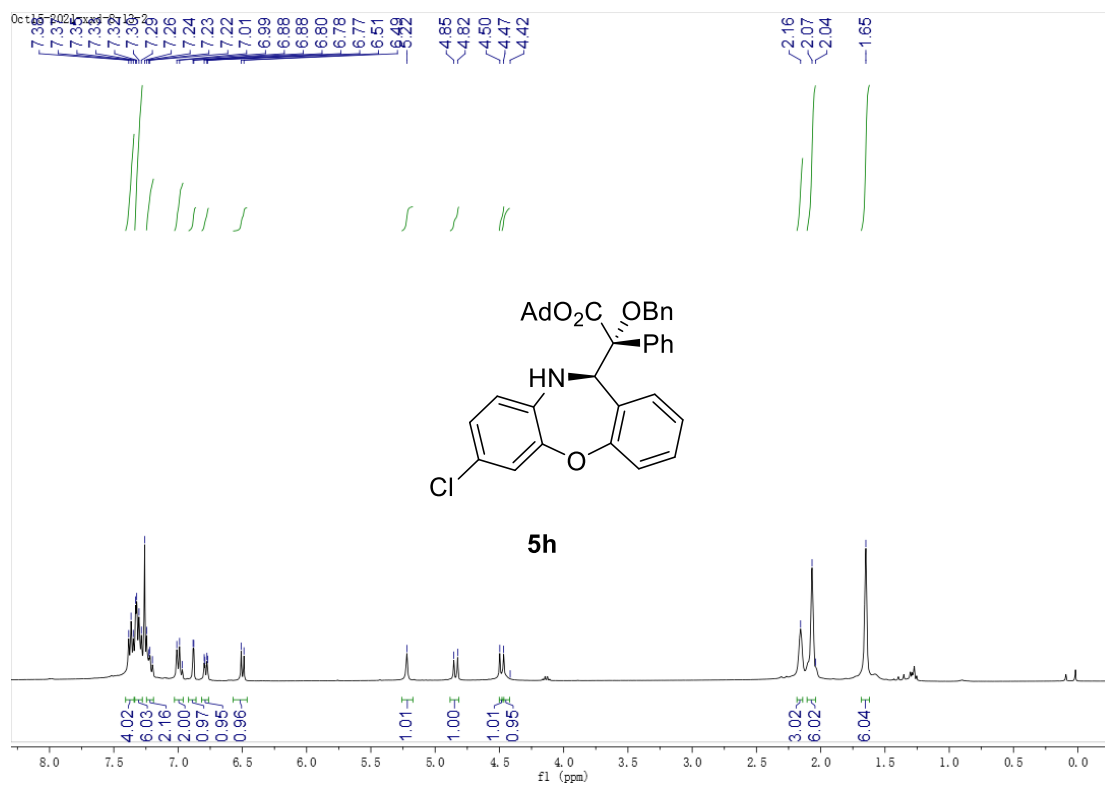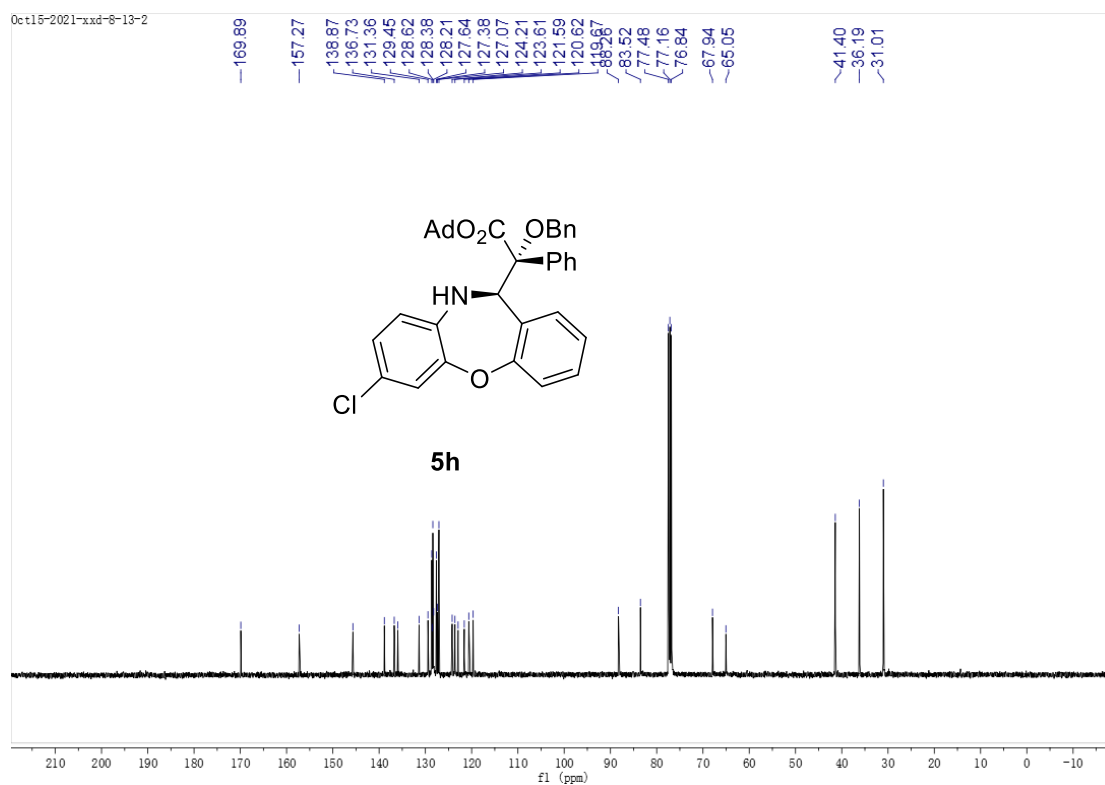



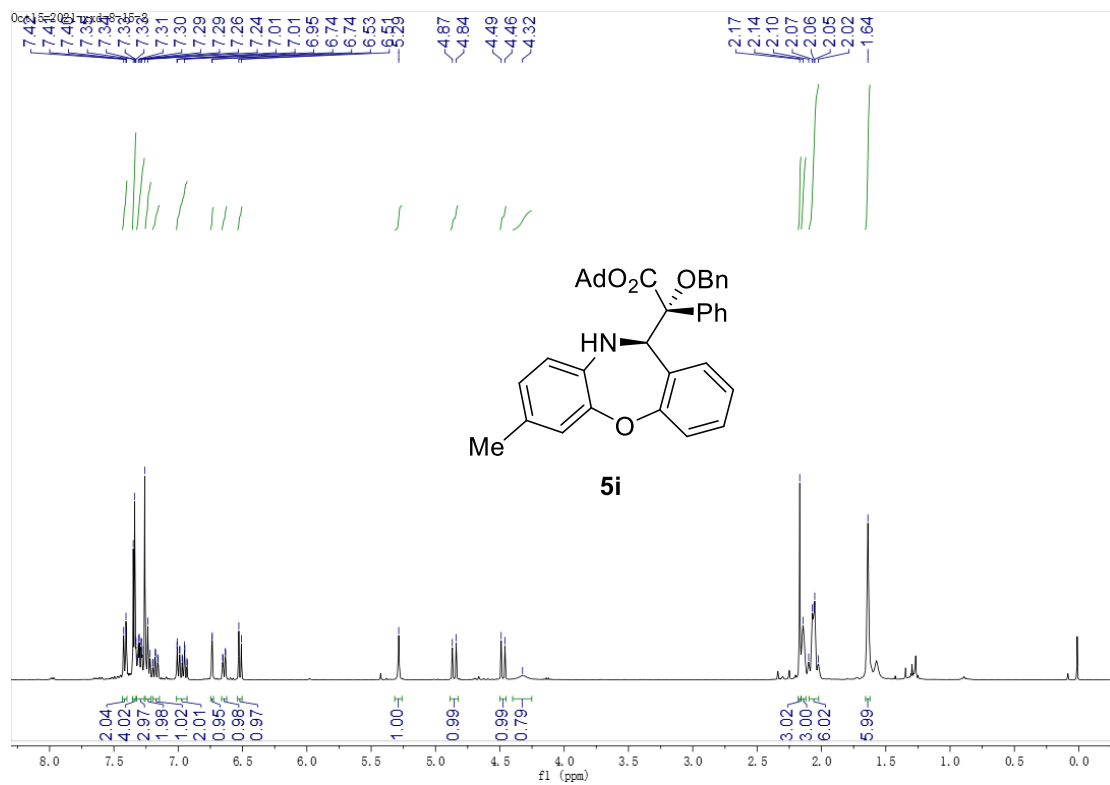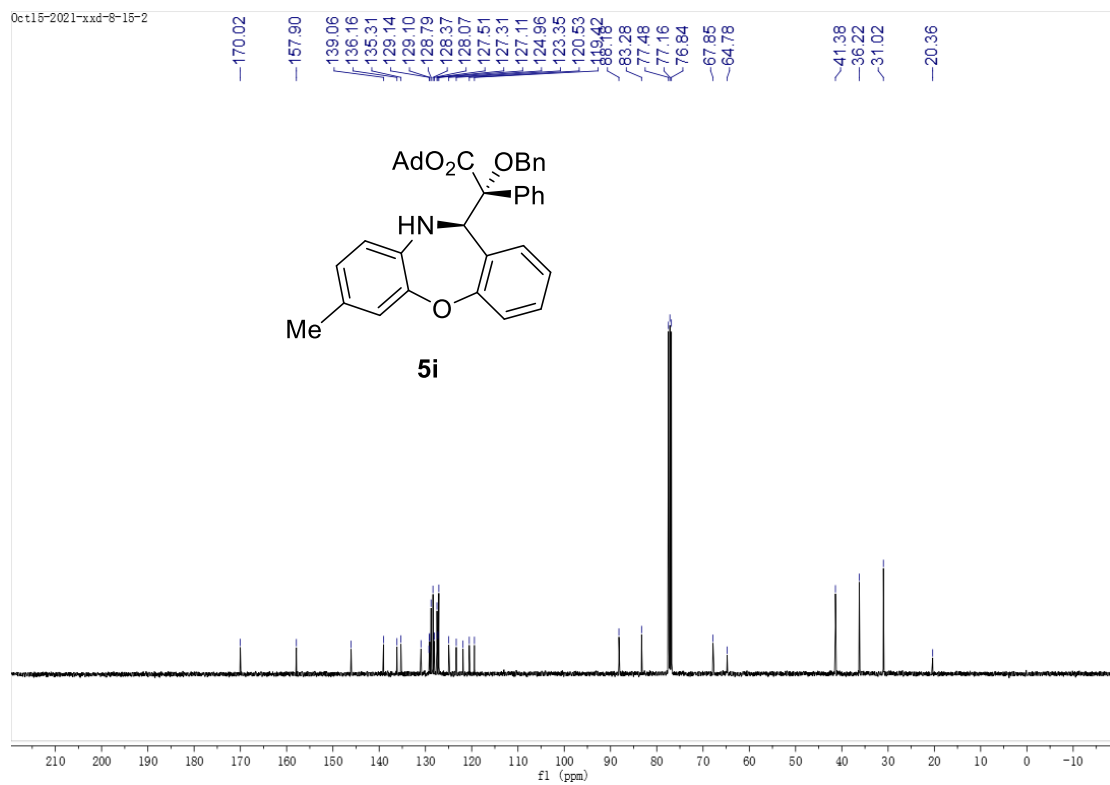

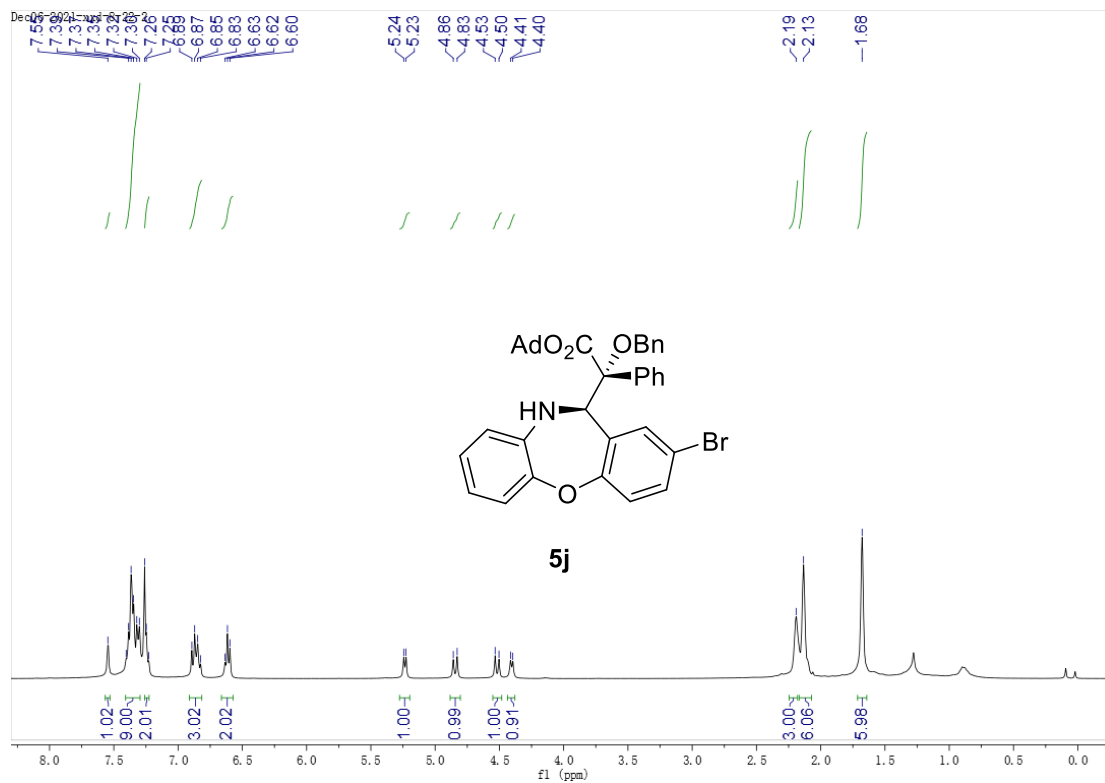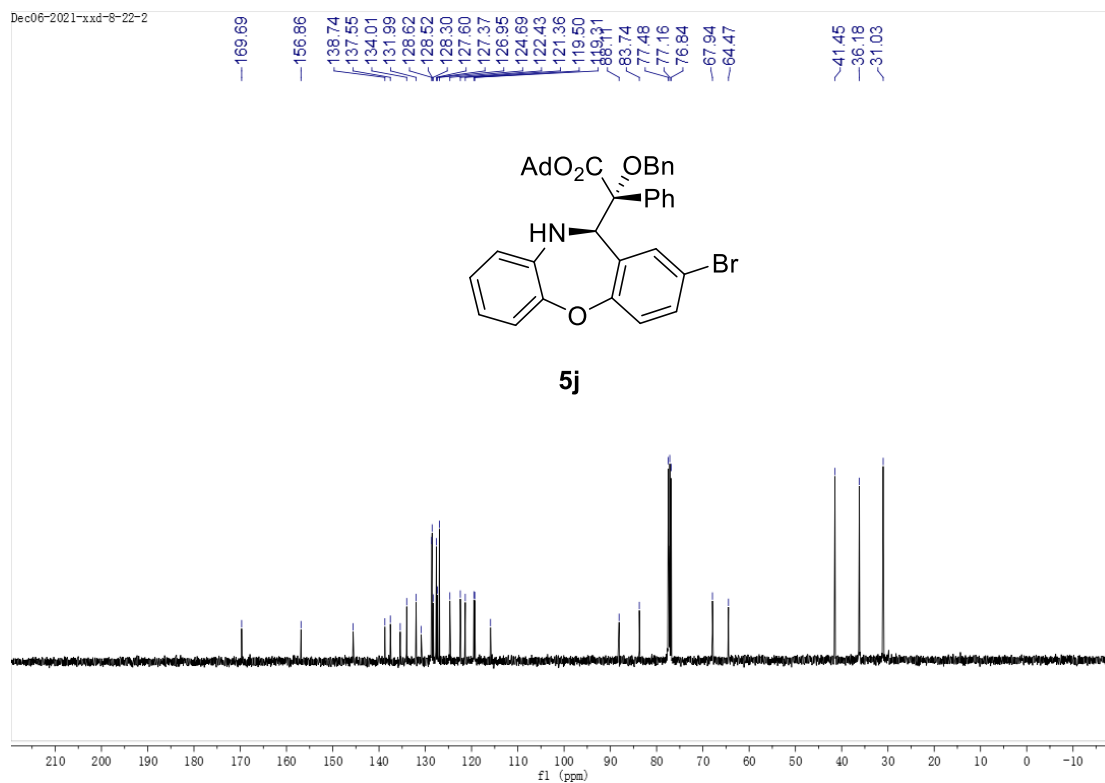

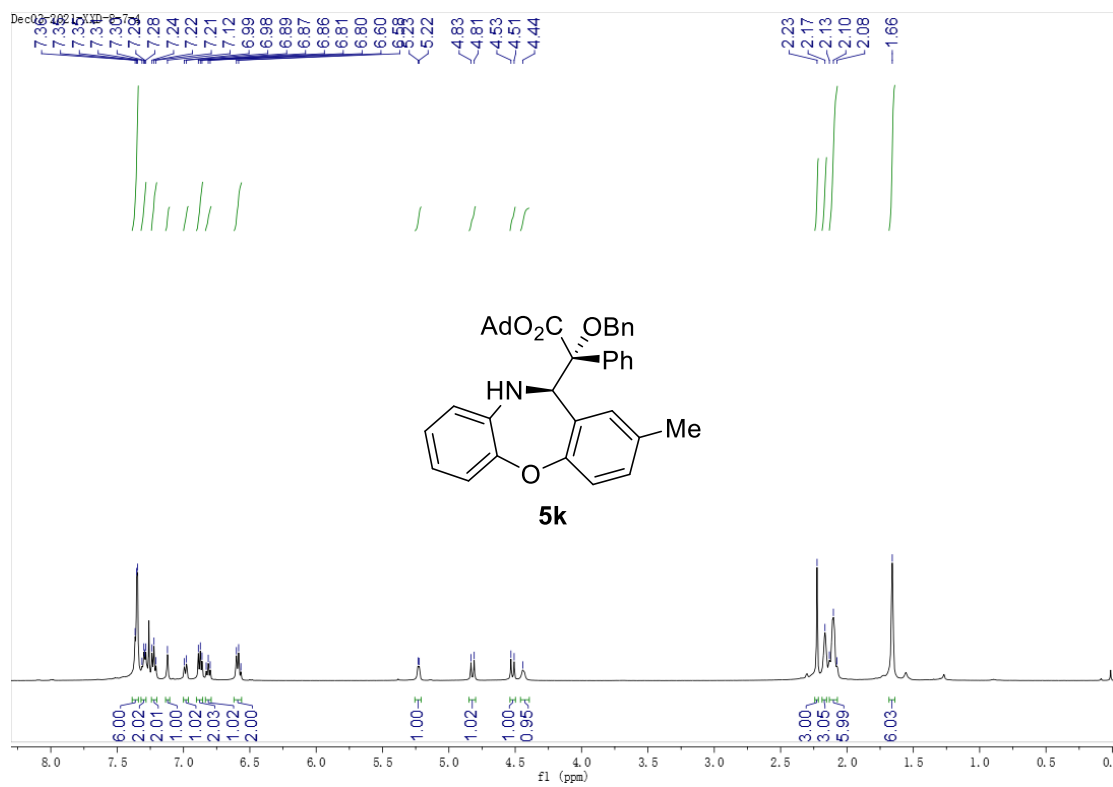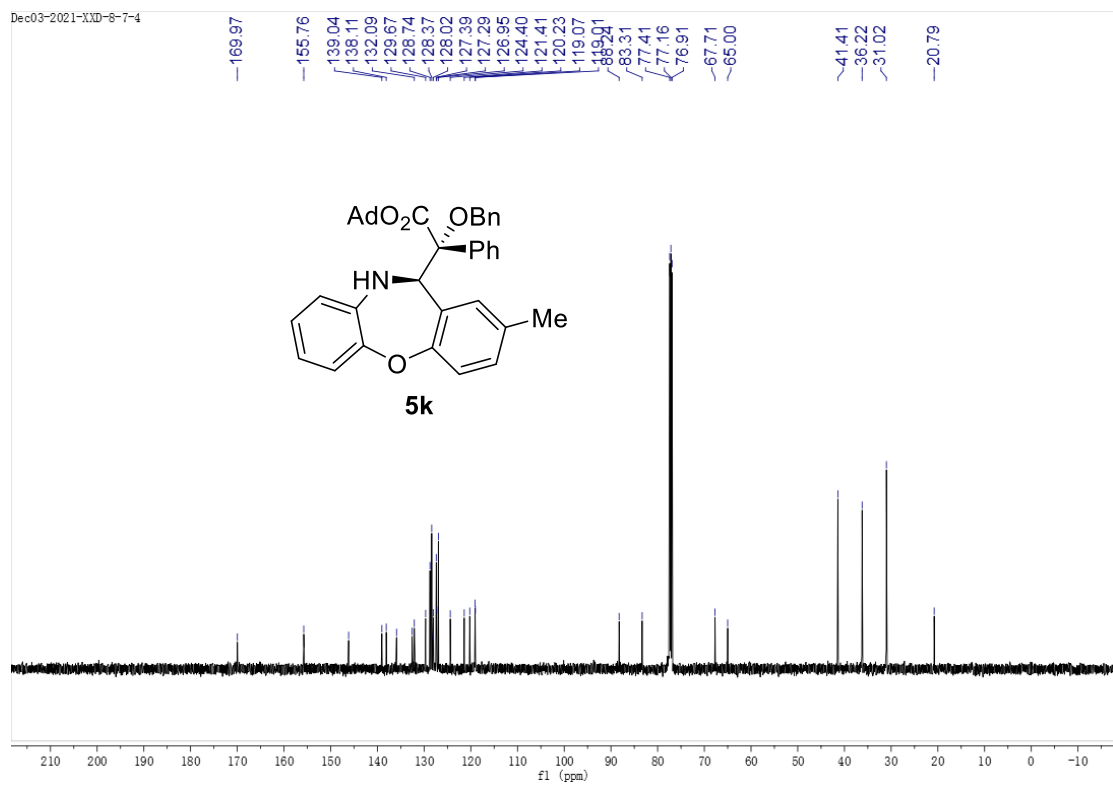

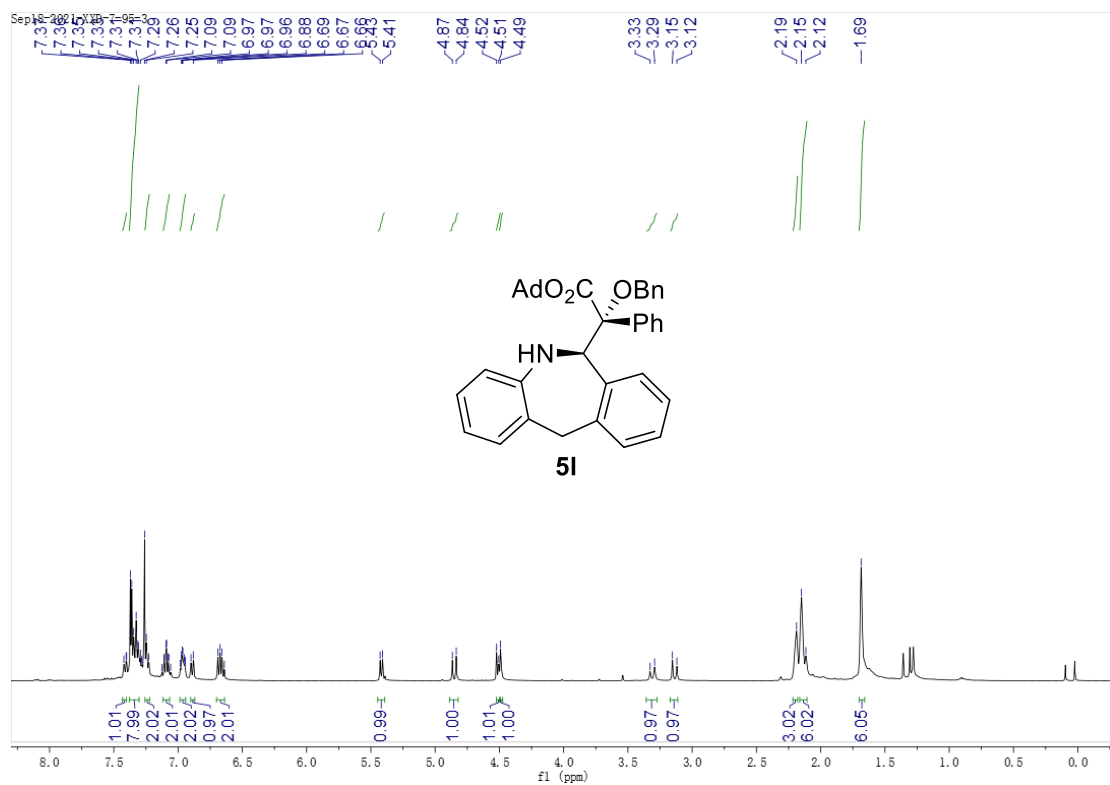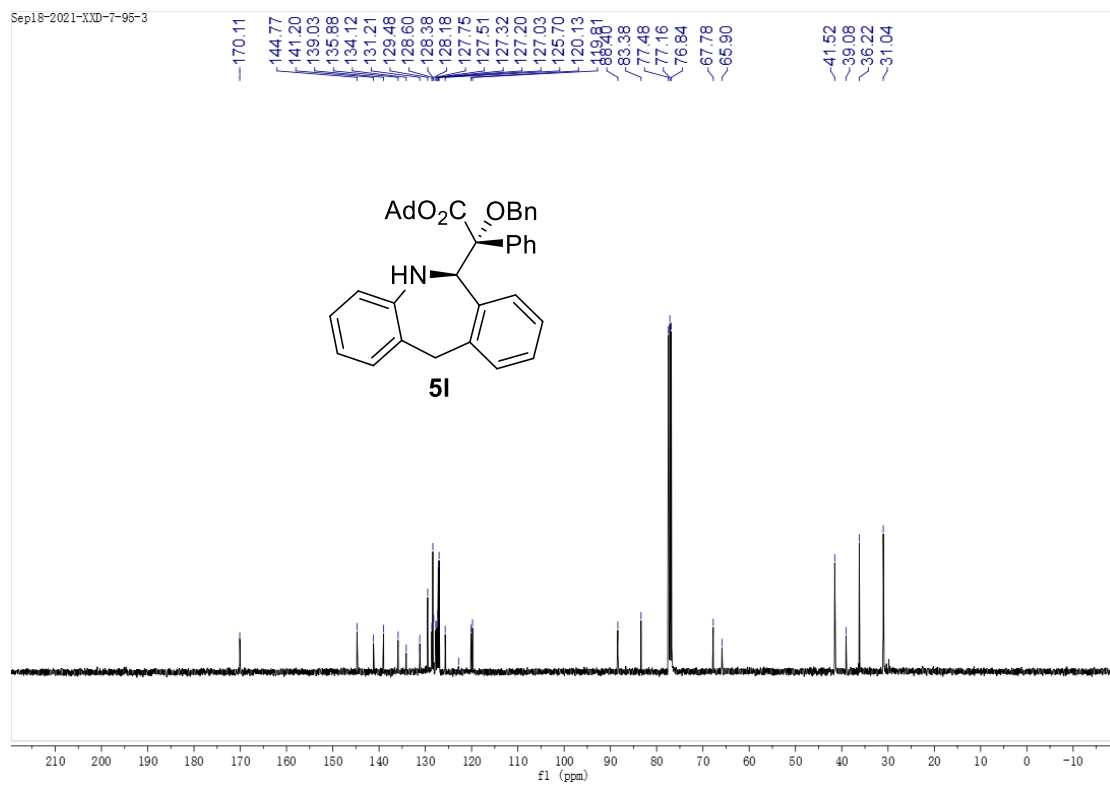

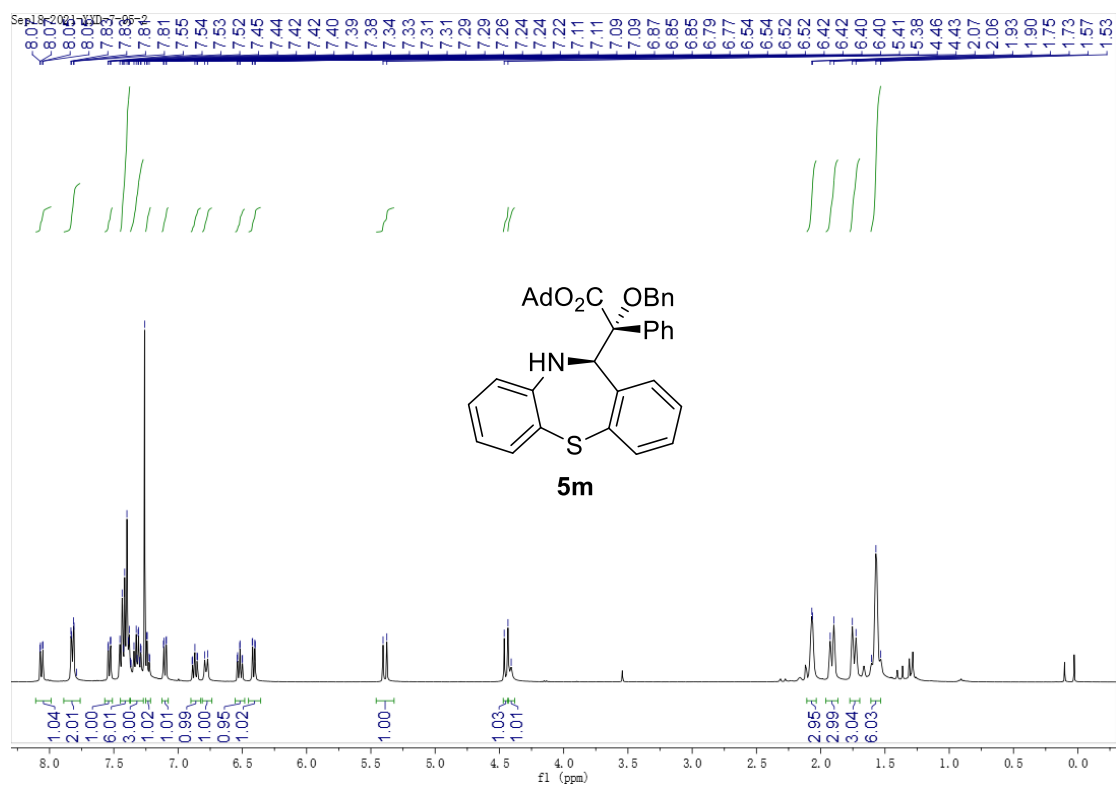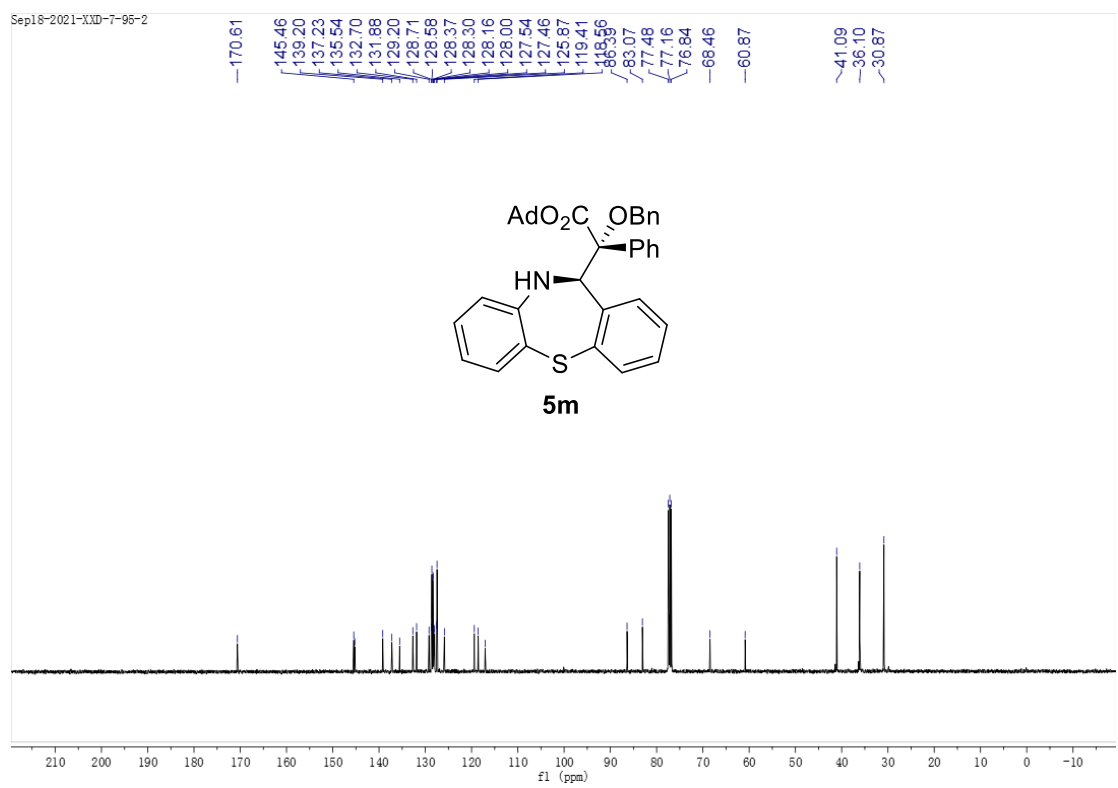

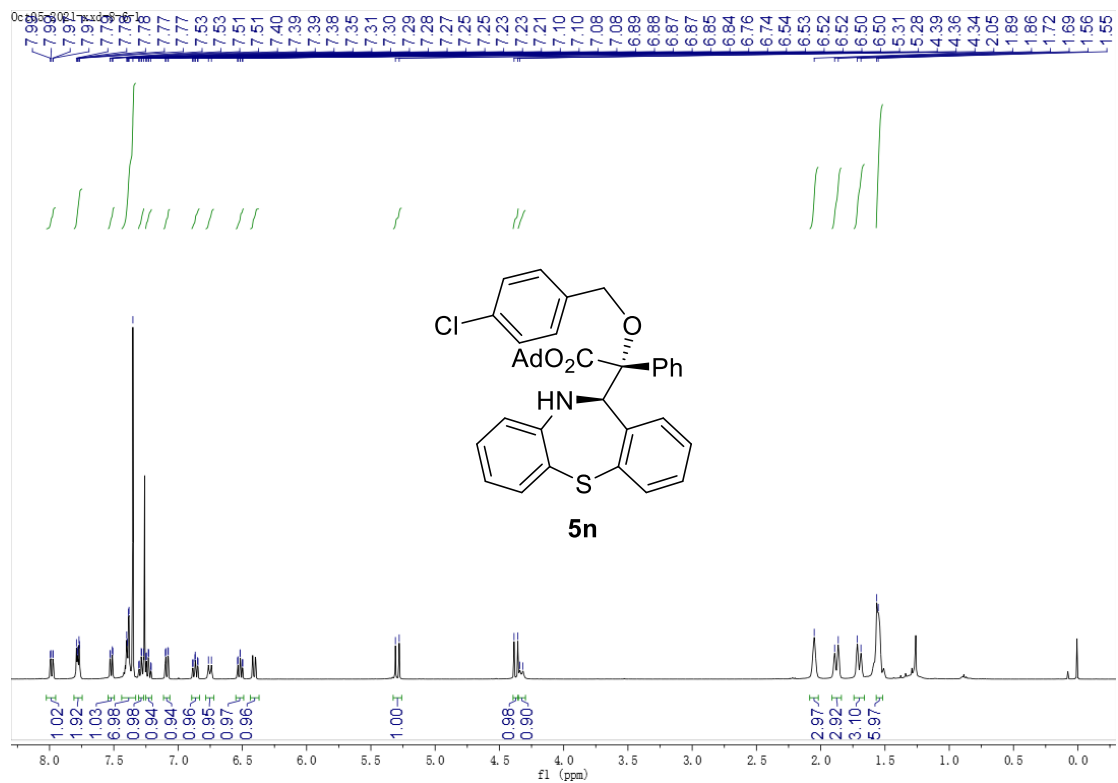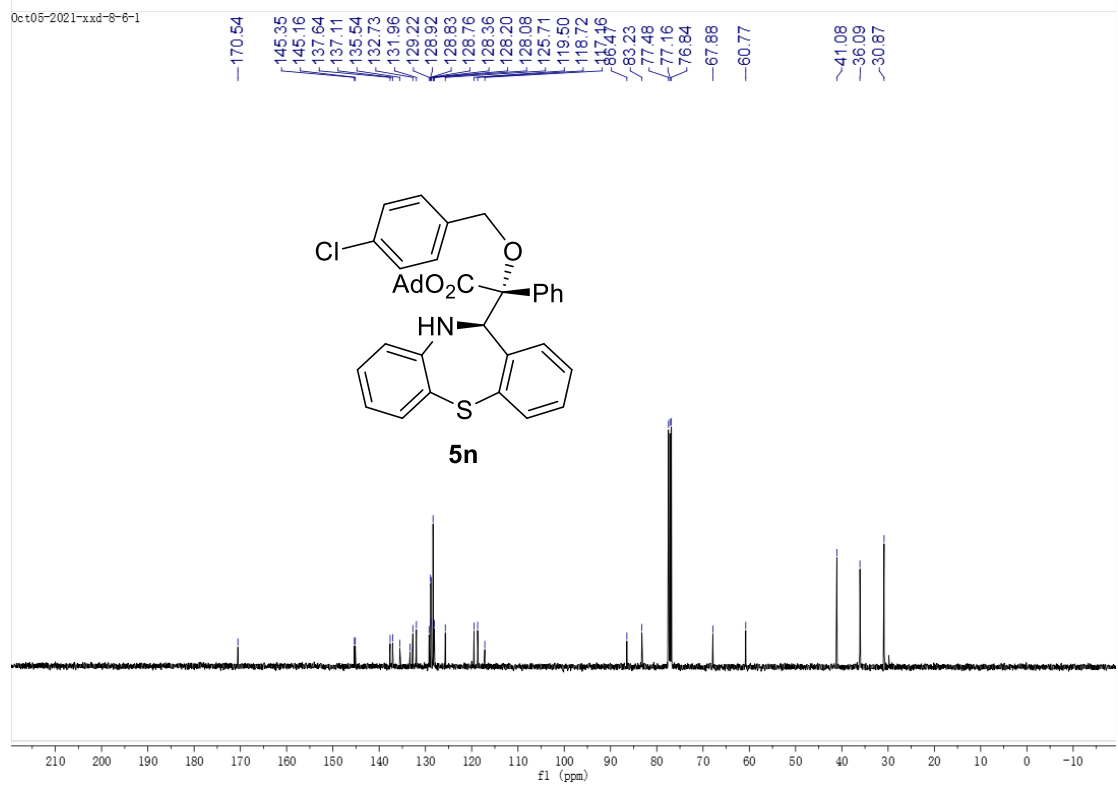







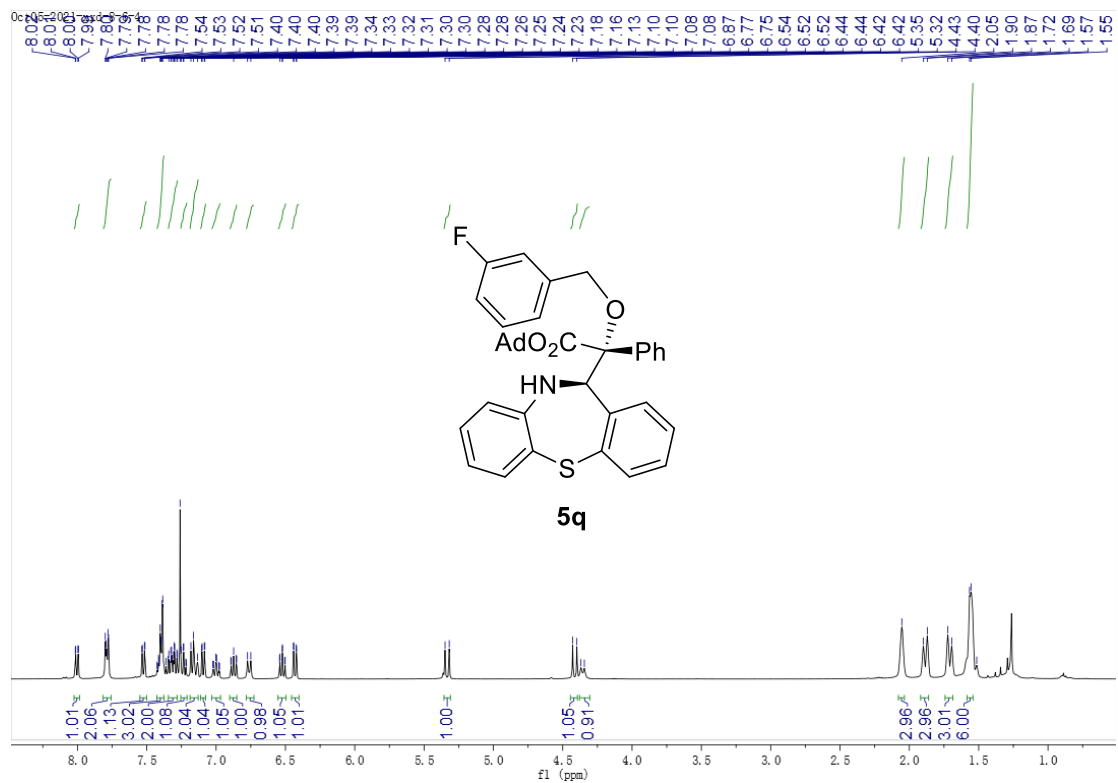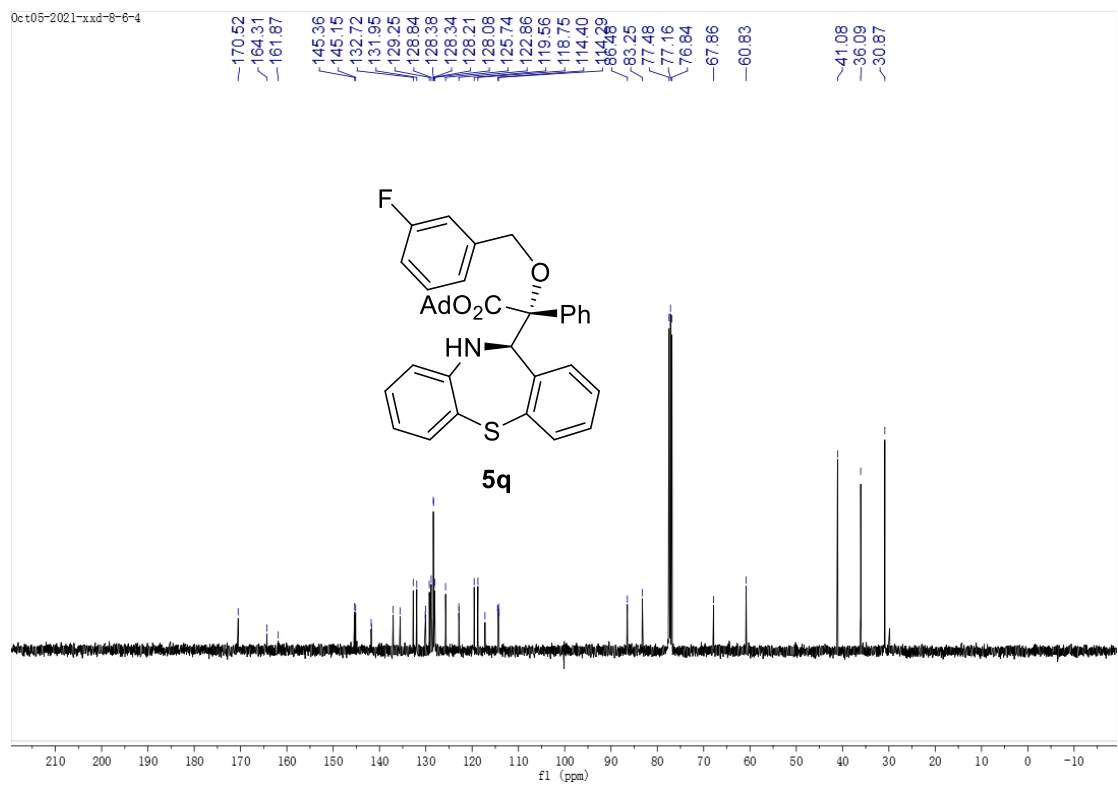

Oct05-2021-xxd-8-6-4

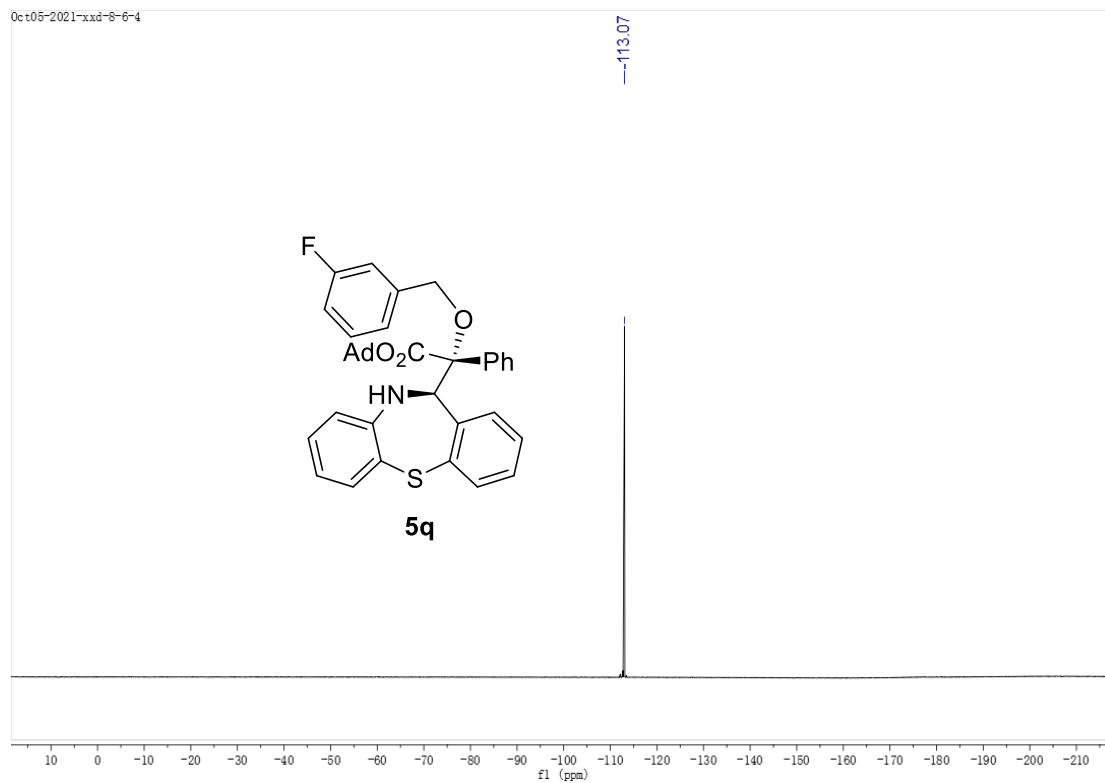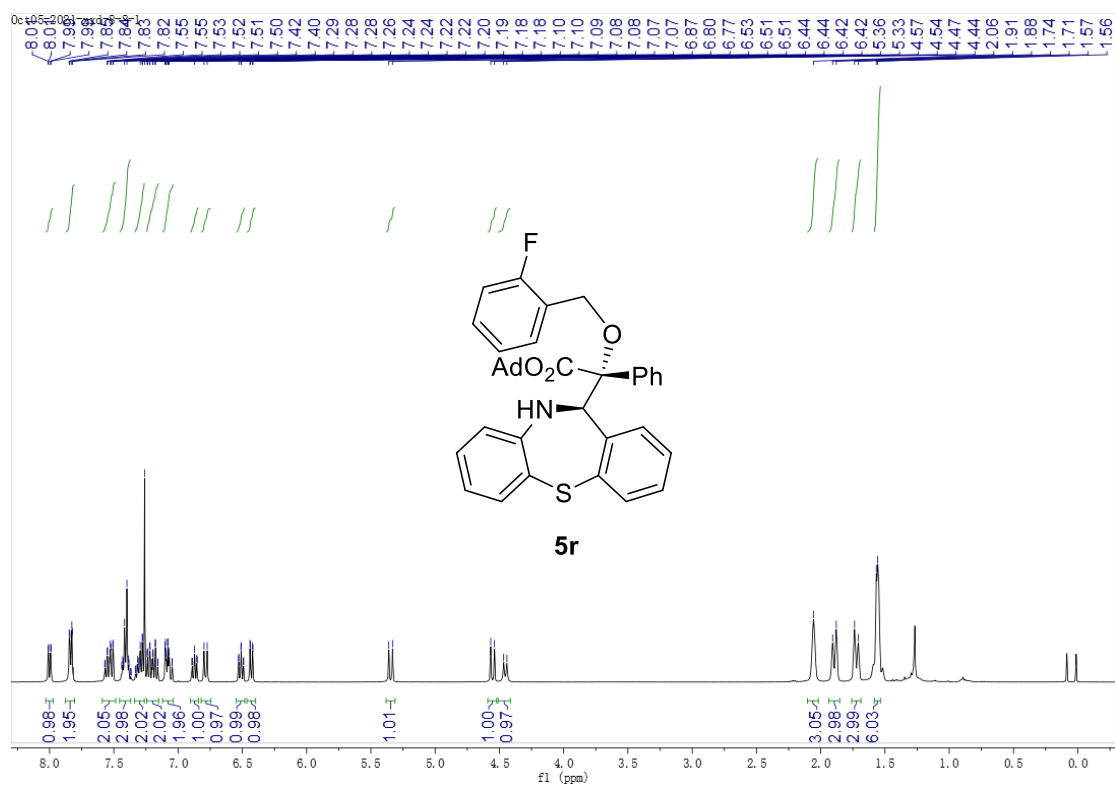

Oct05-2021-xxd-8-8-1

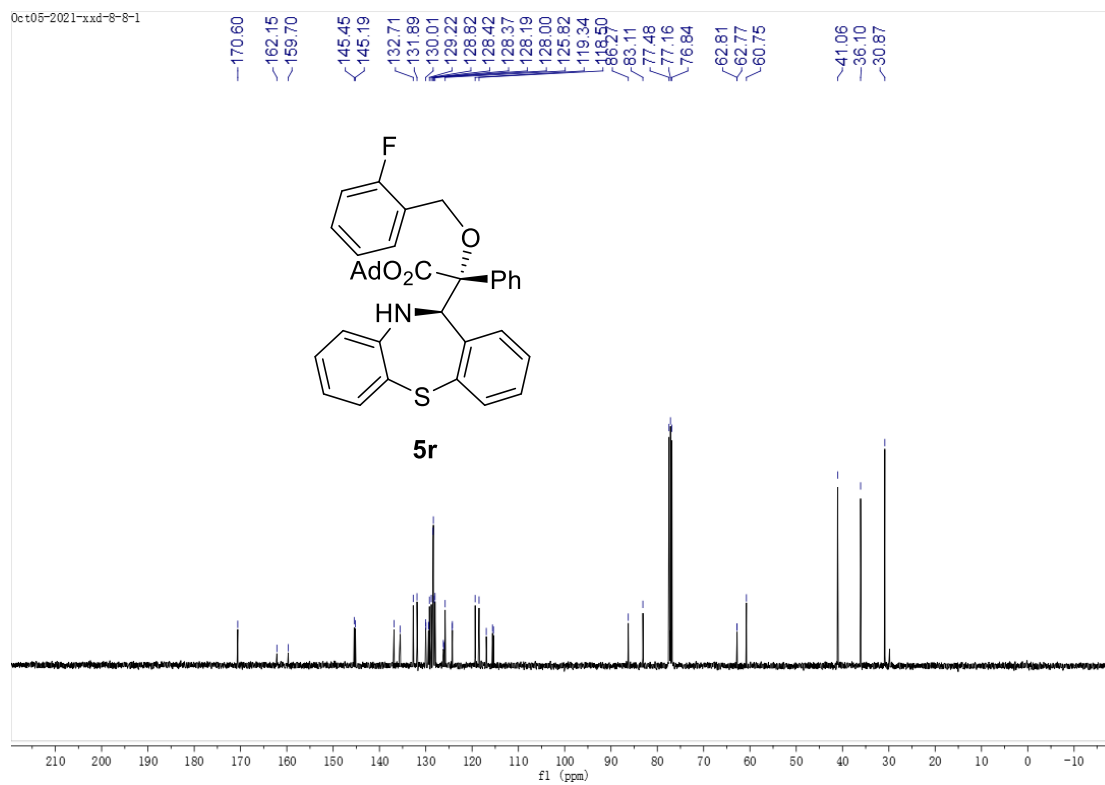

Oct05-2021-xxd-8-8-1

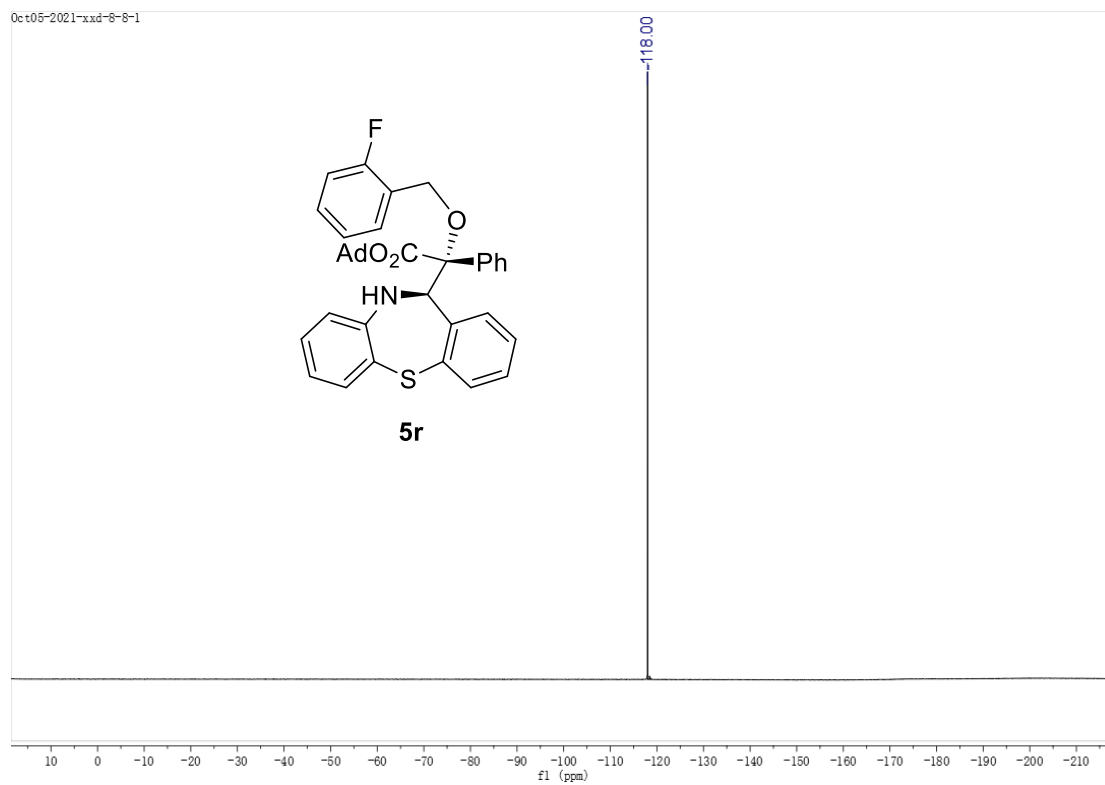

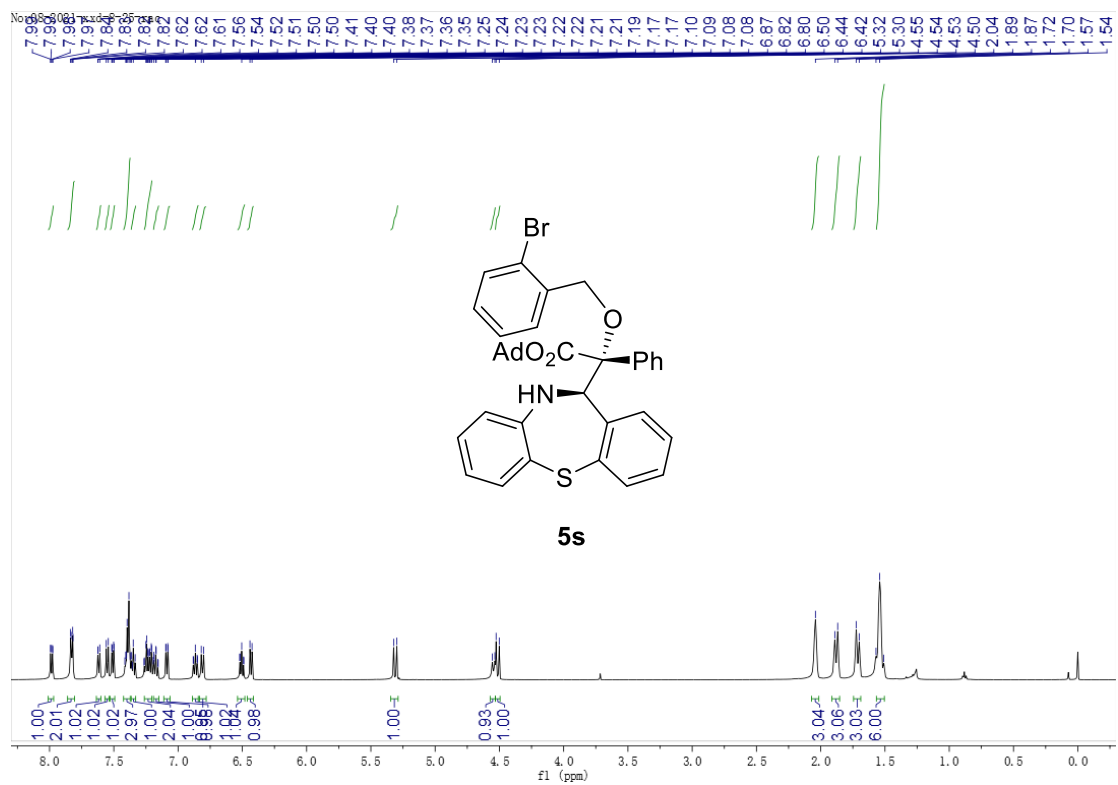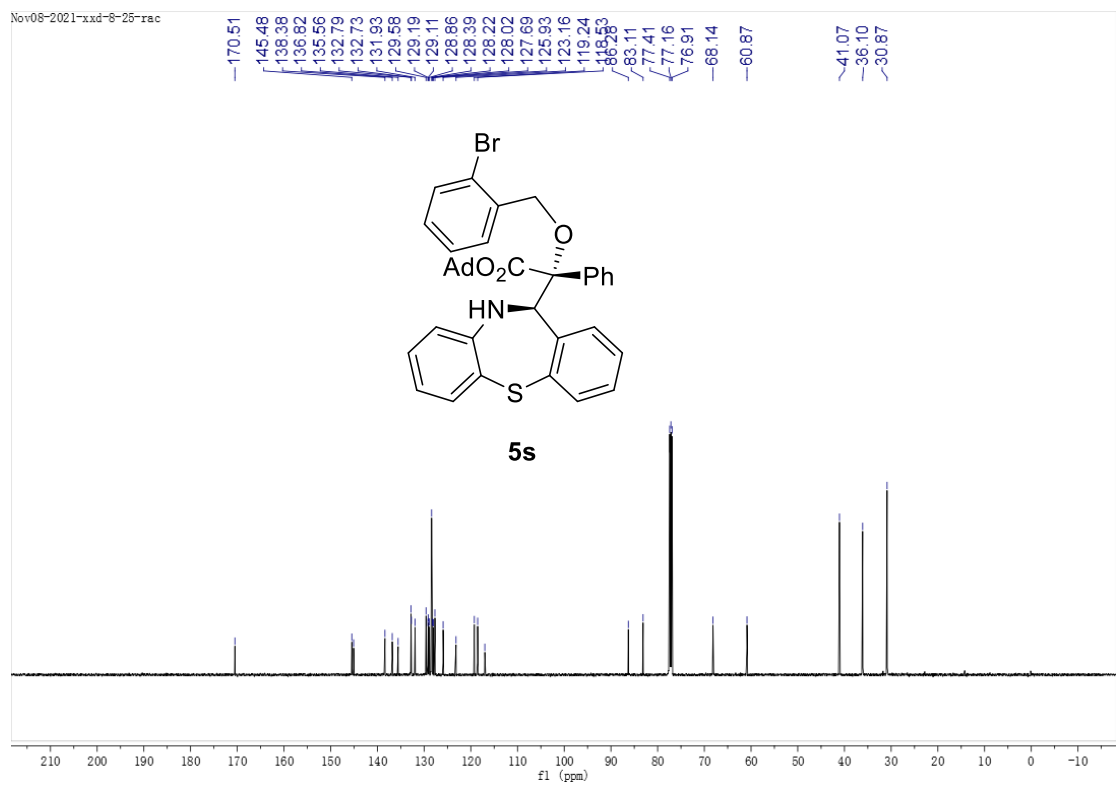

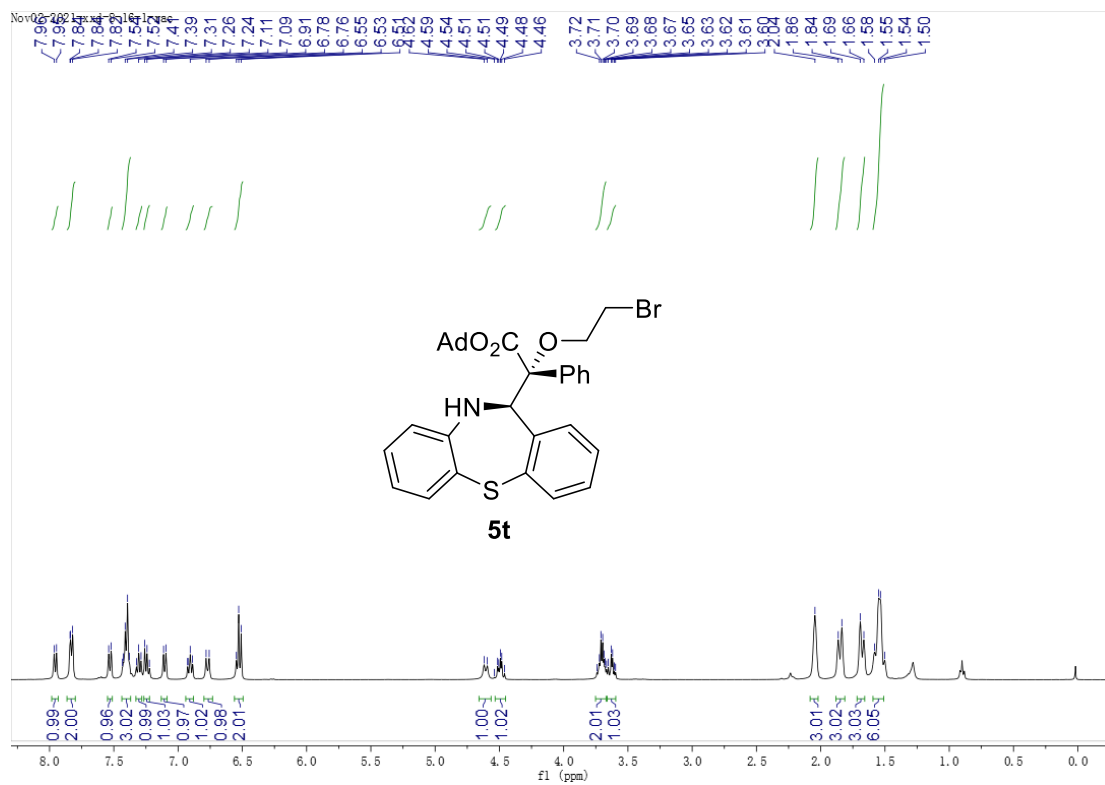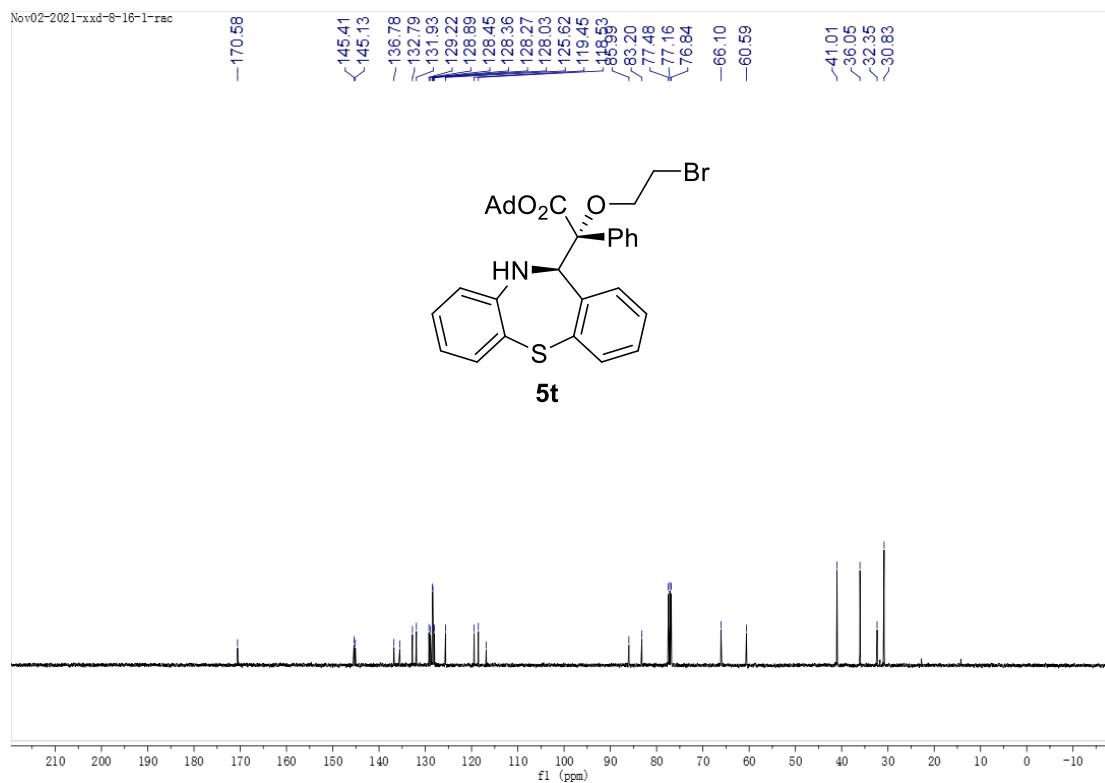

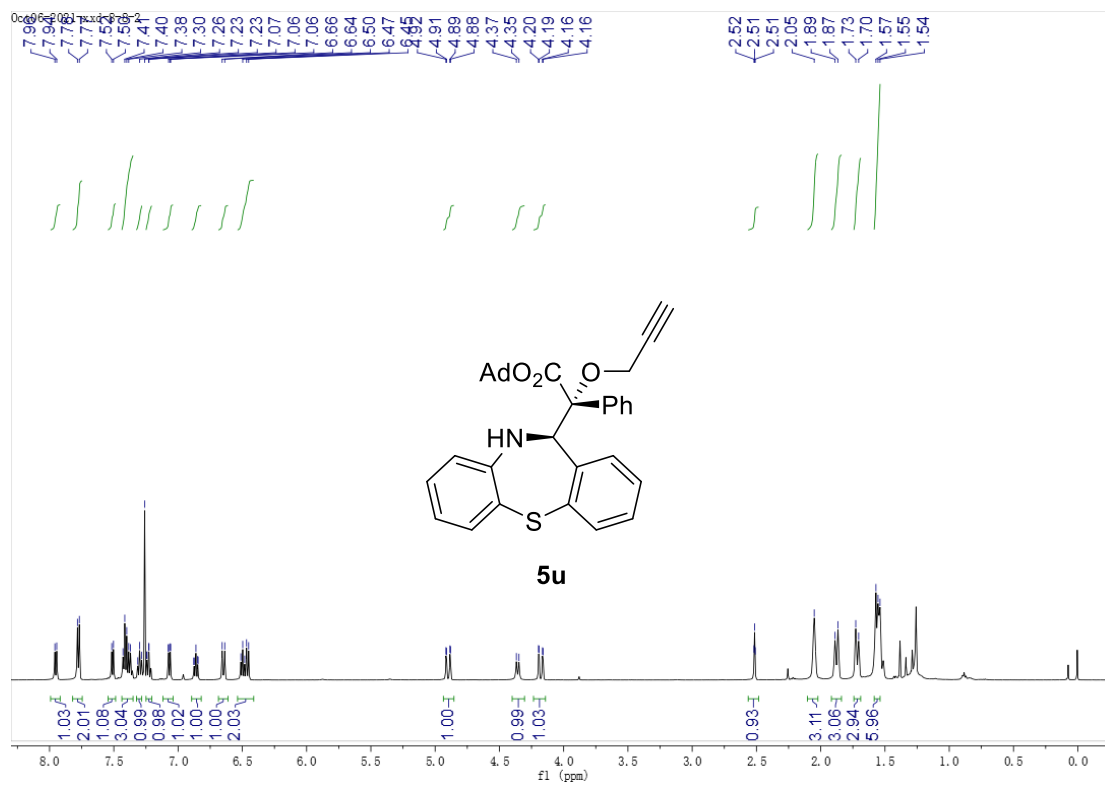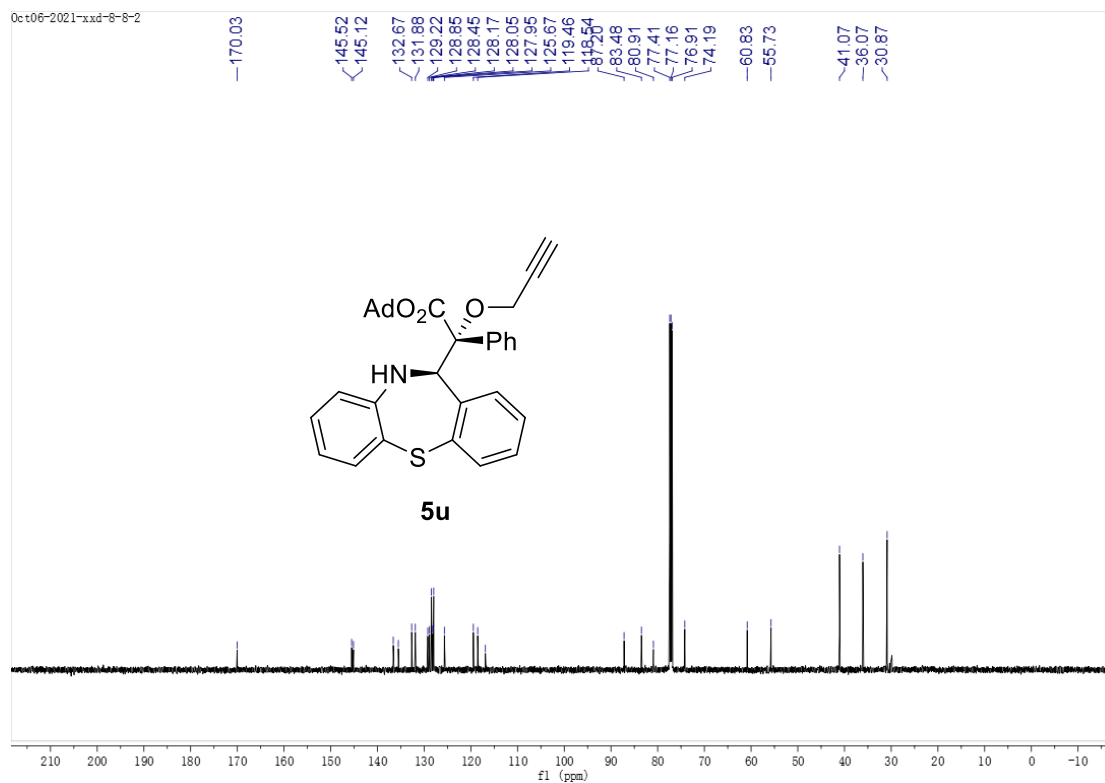

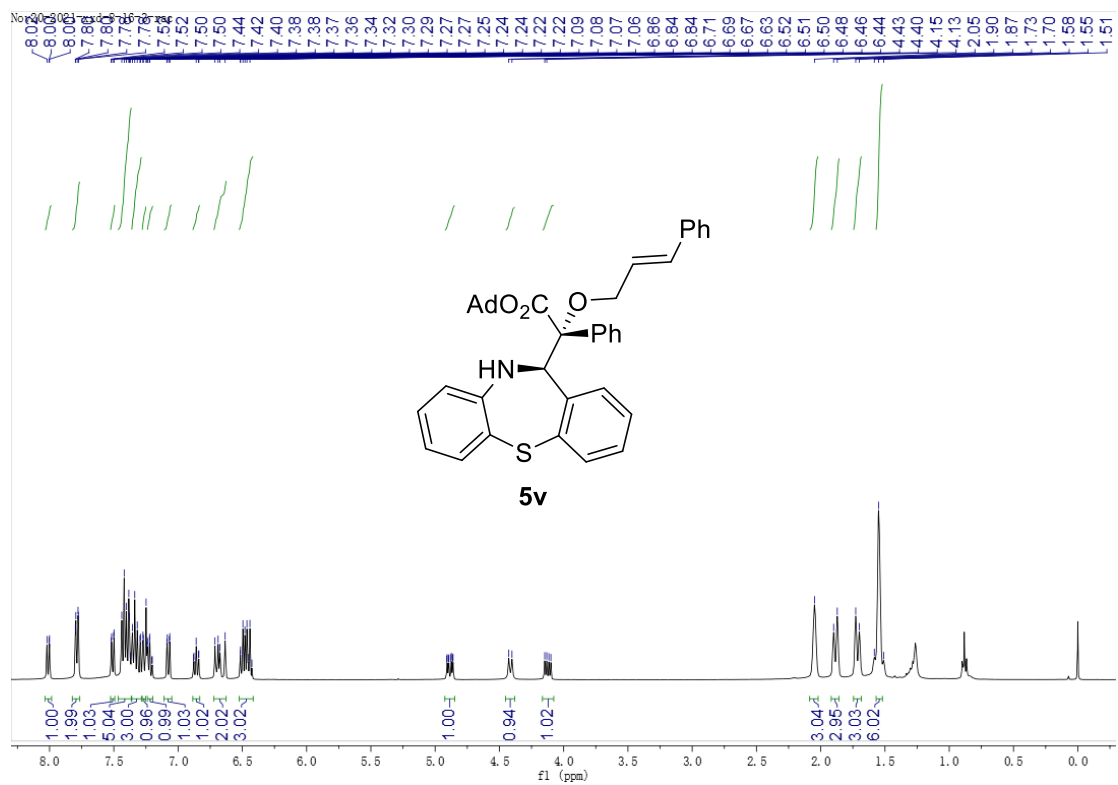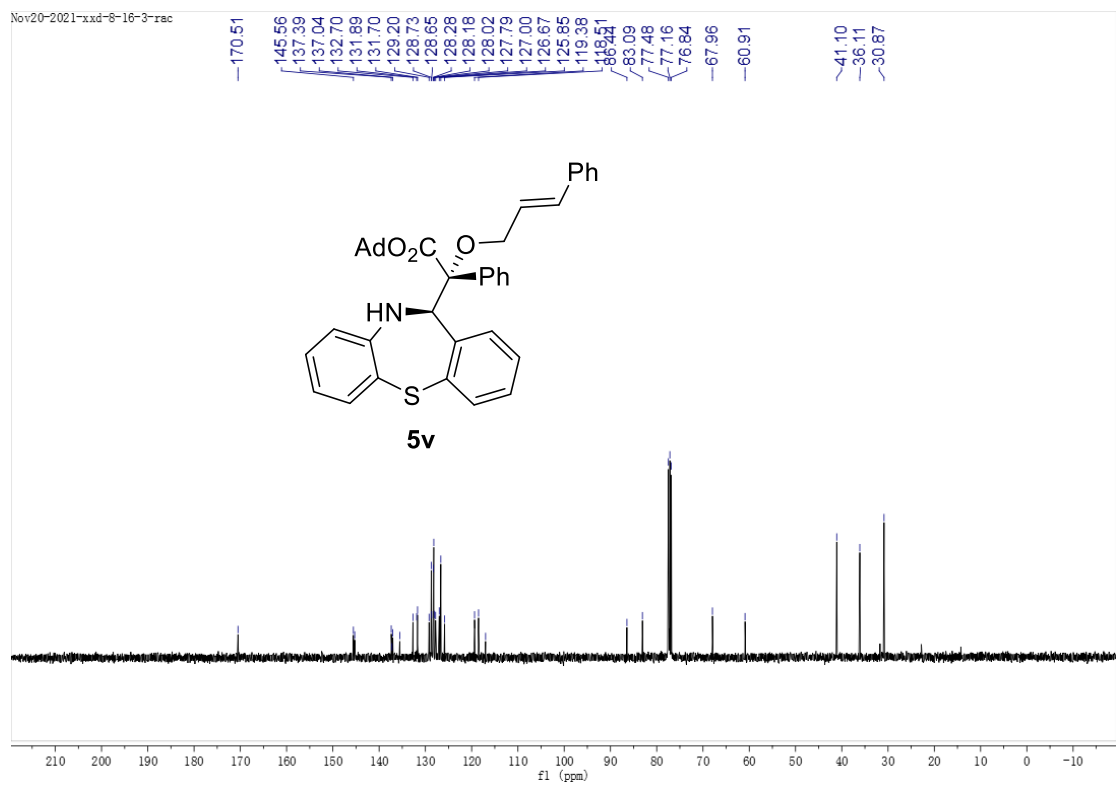

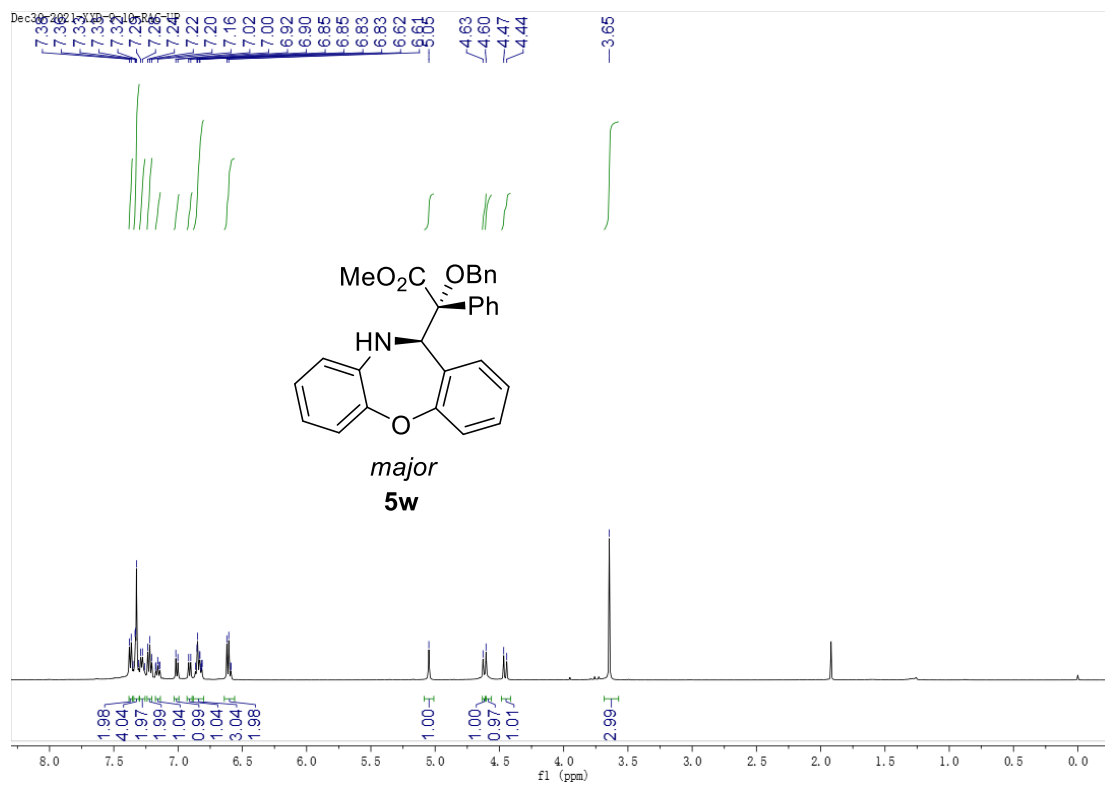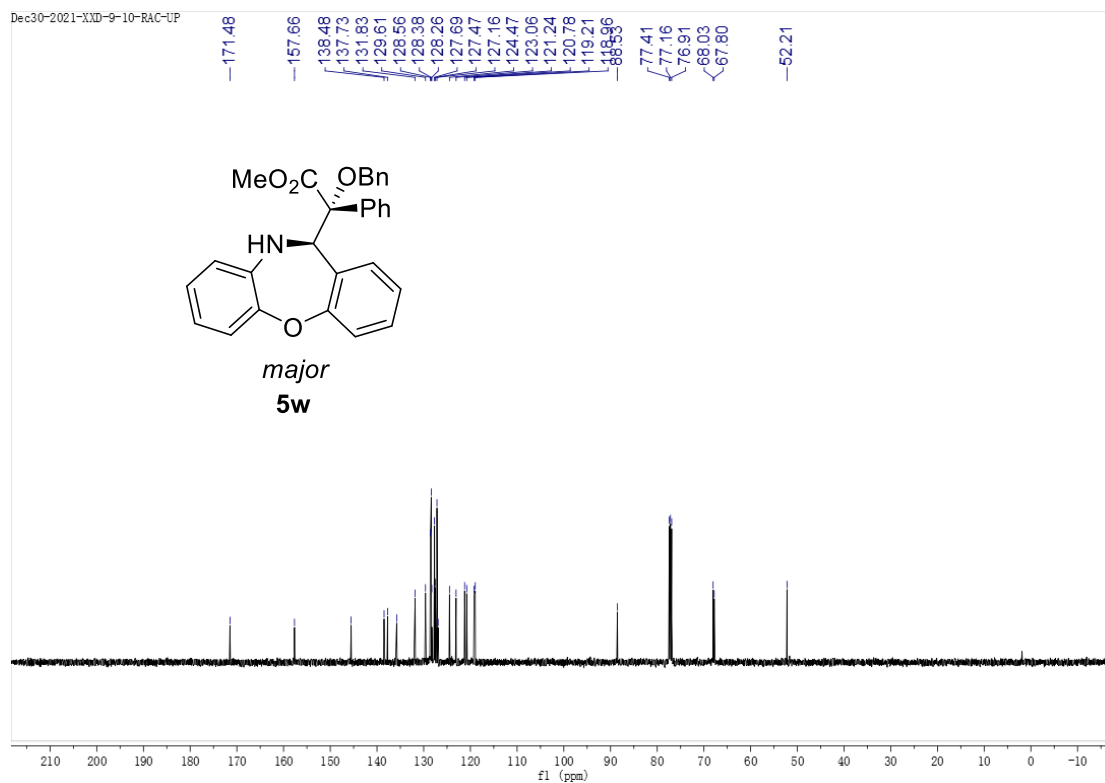



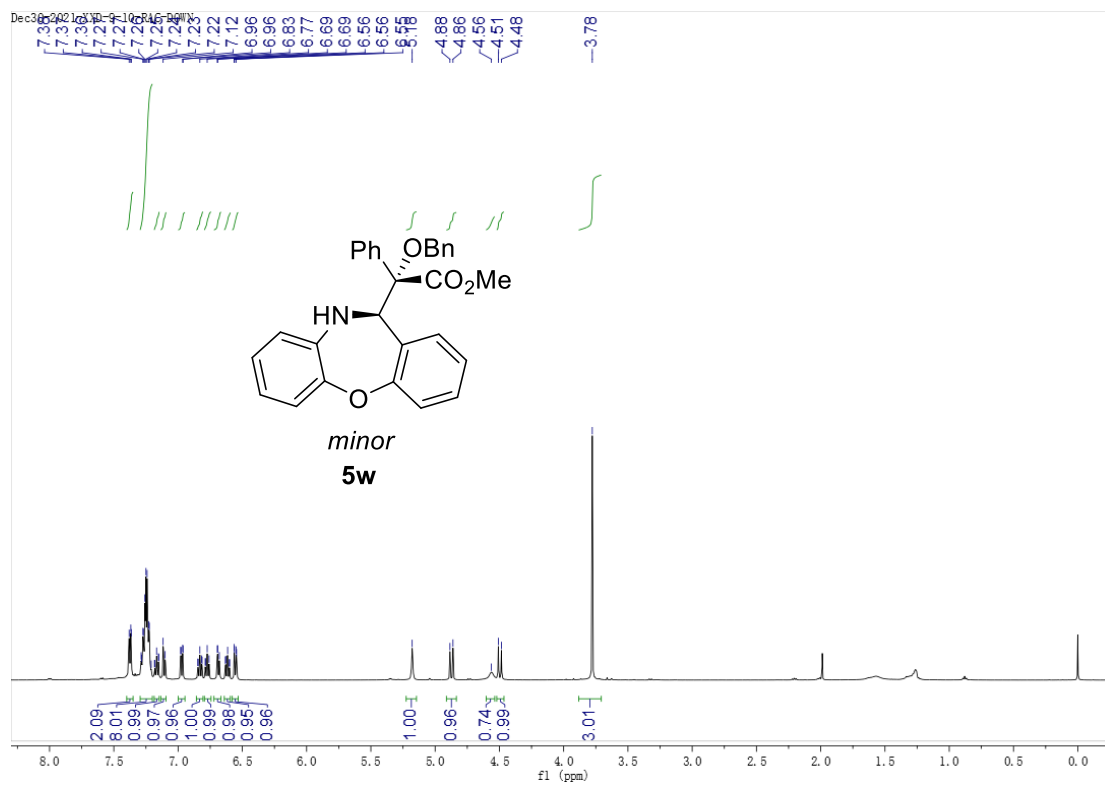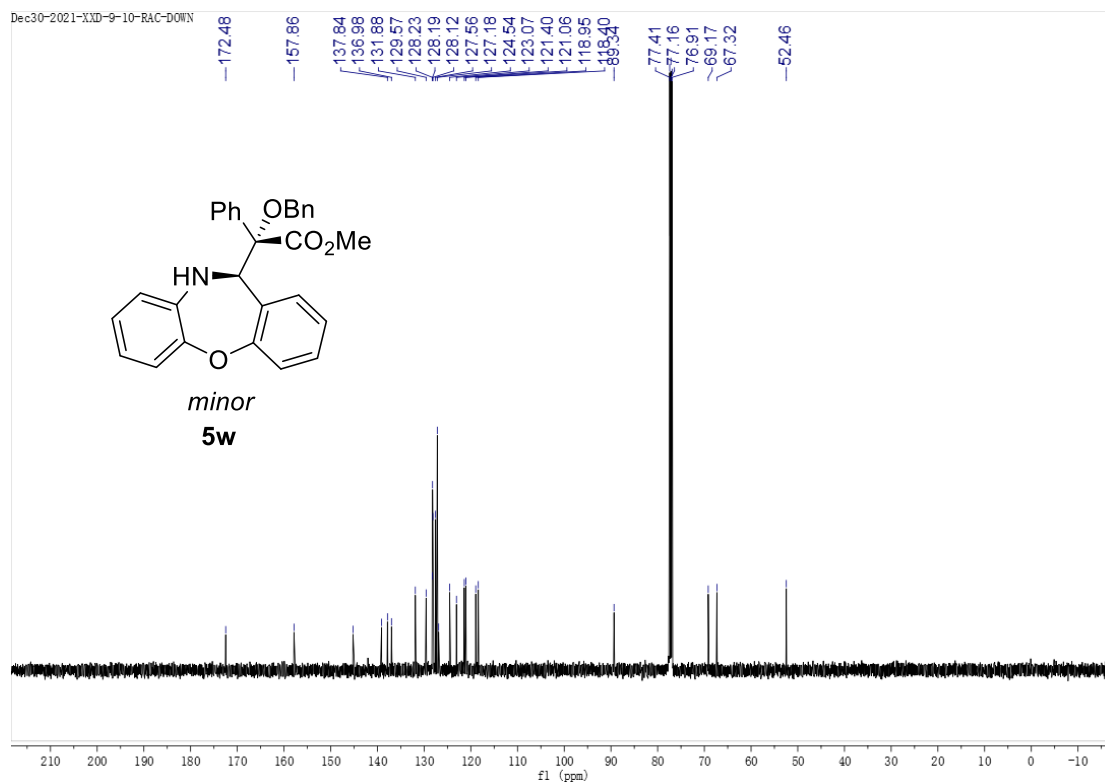

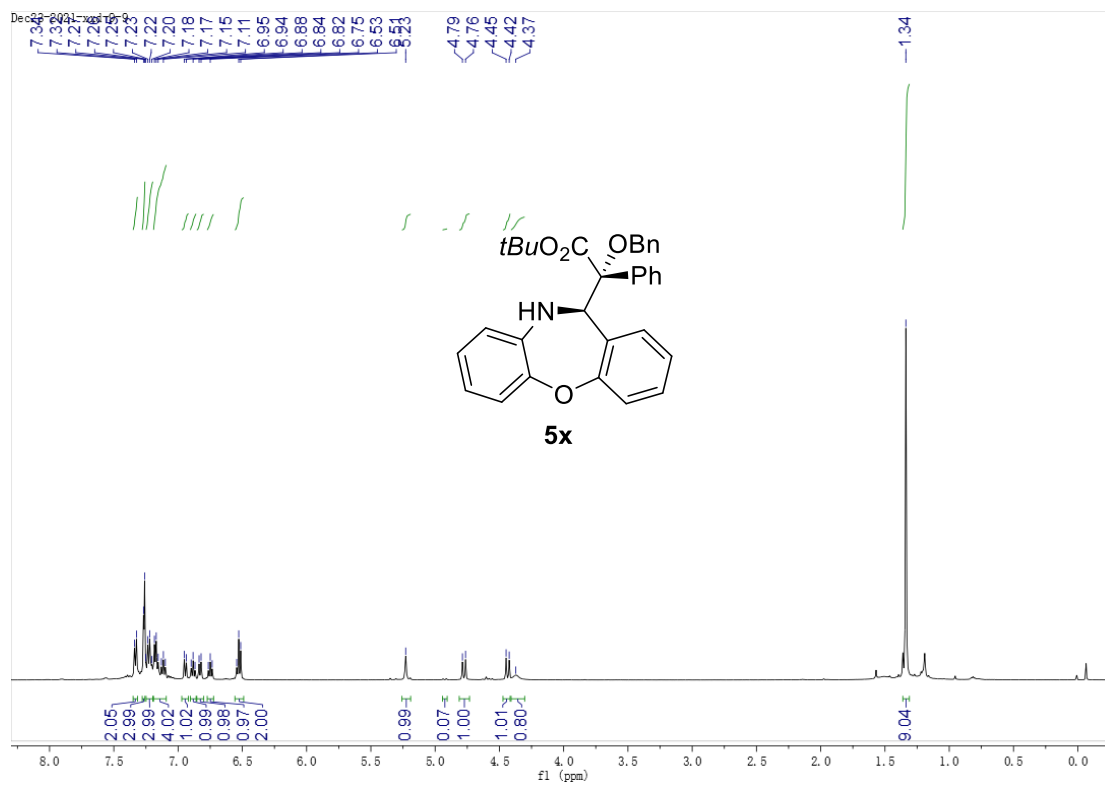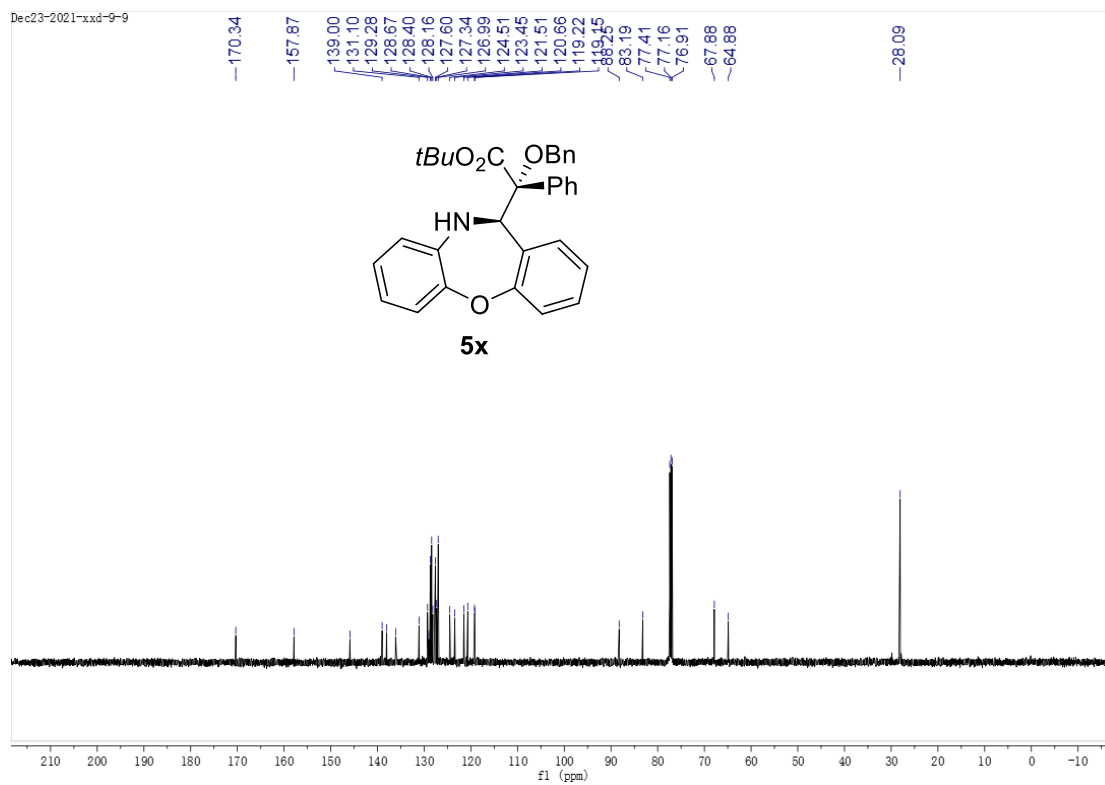

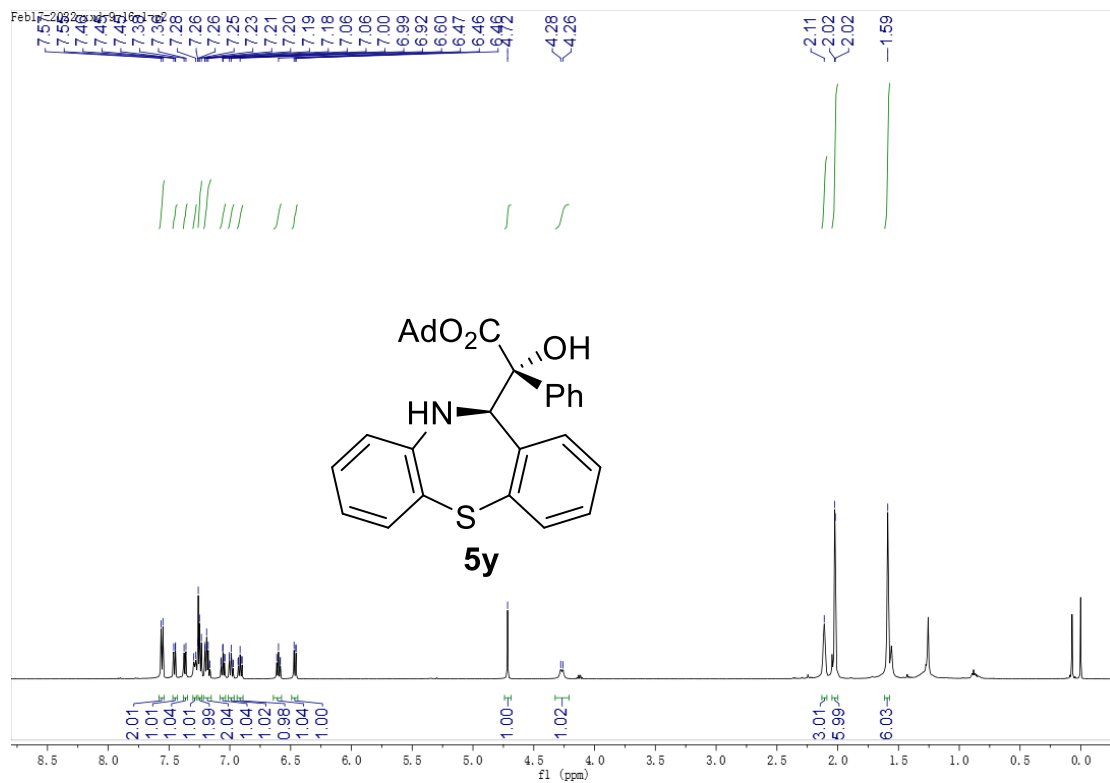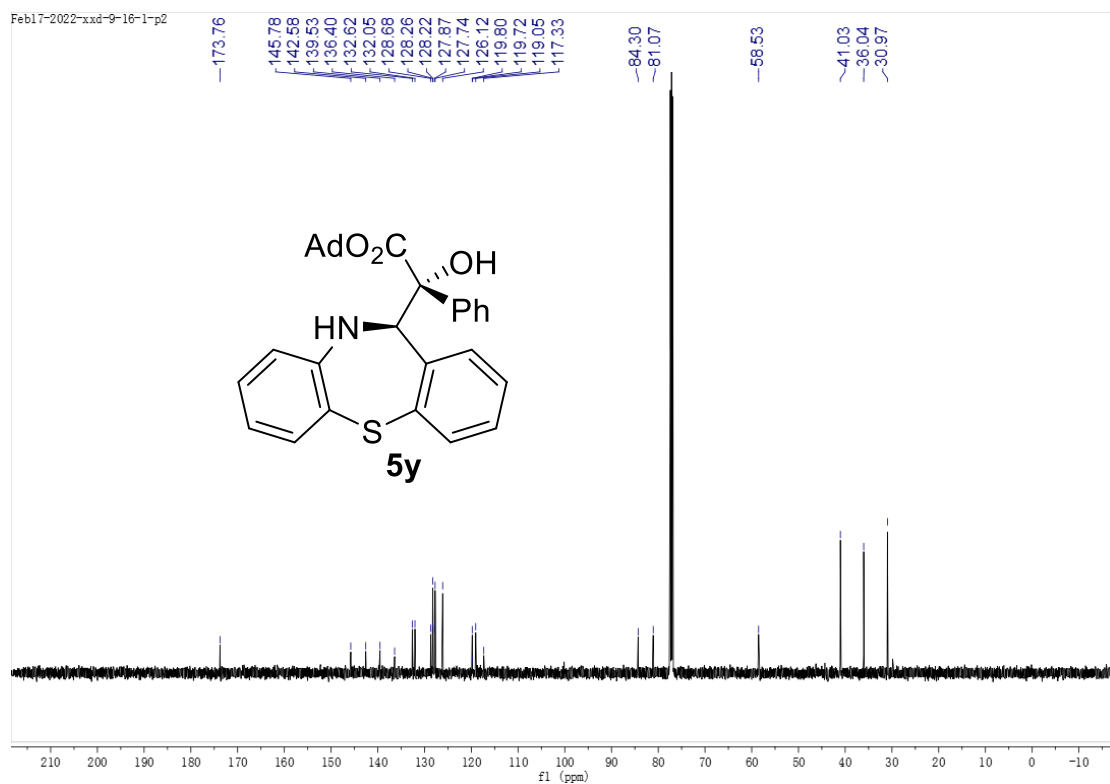



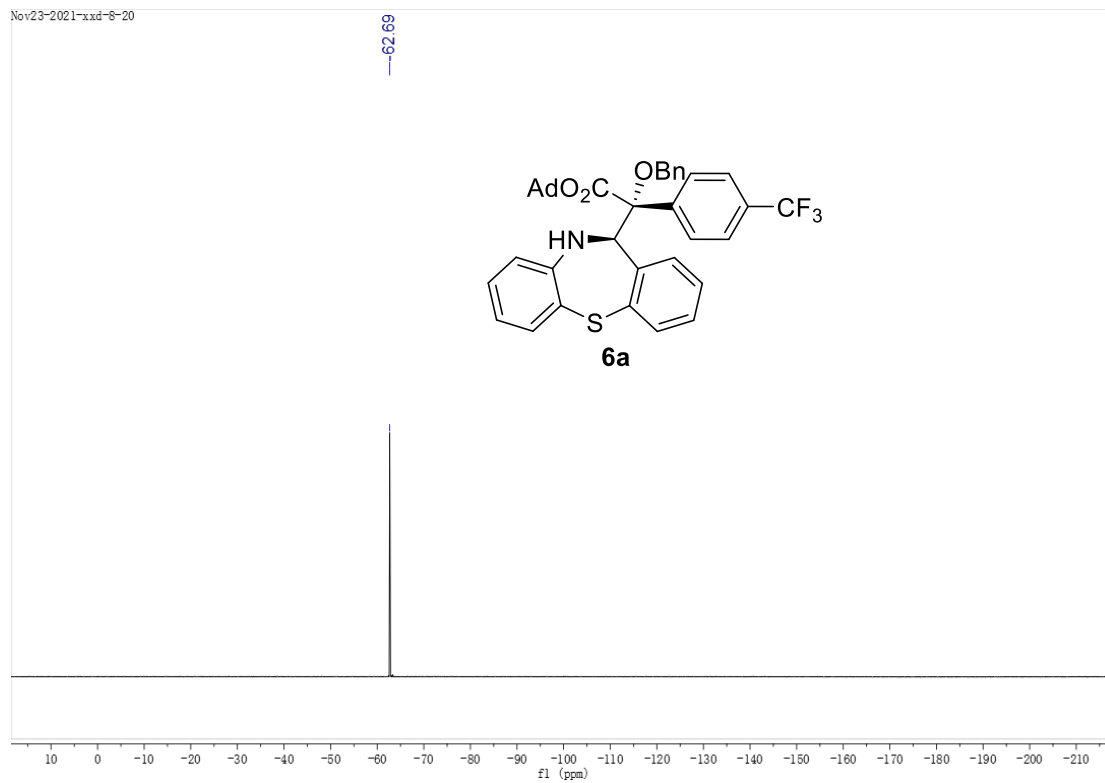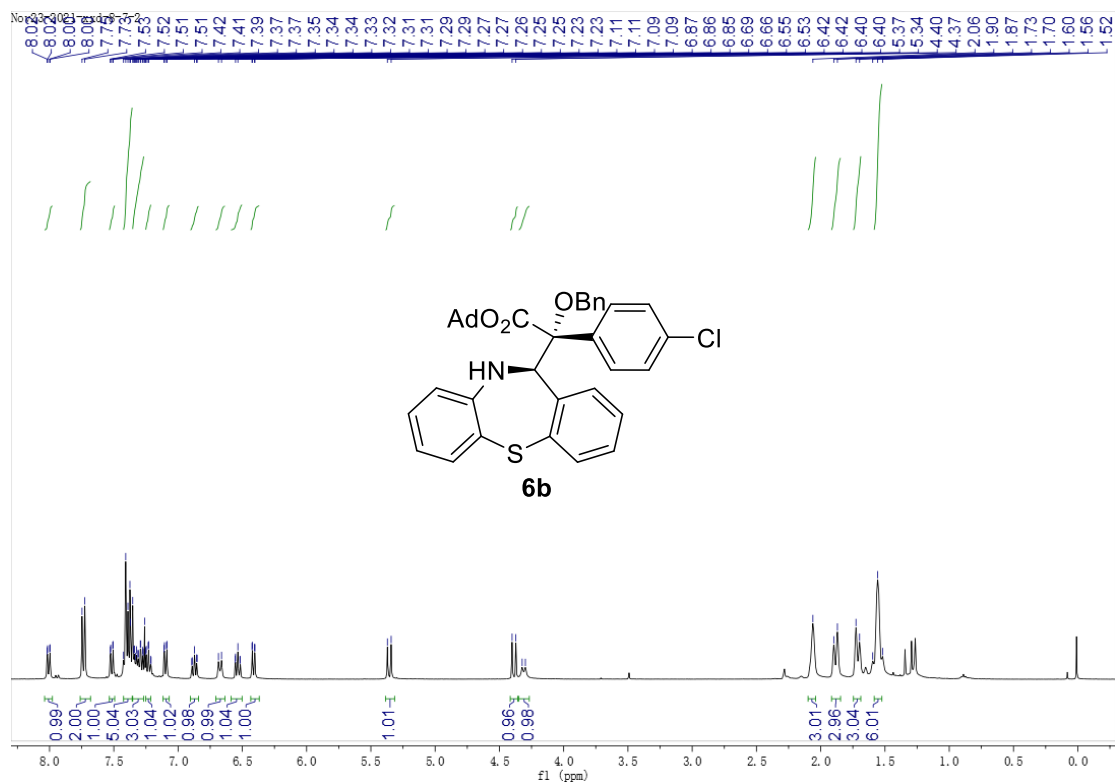

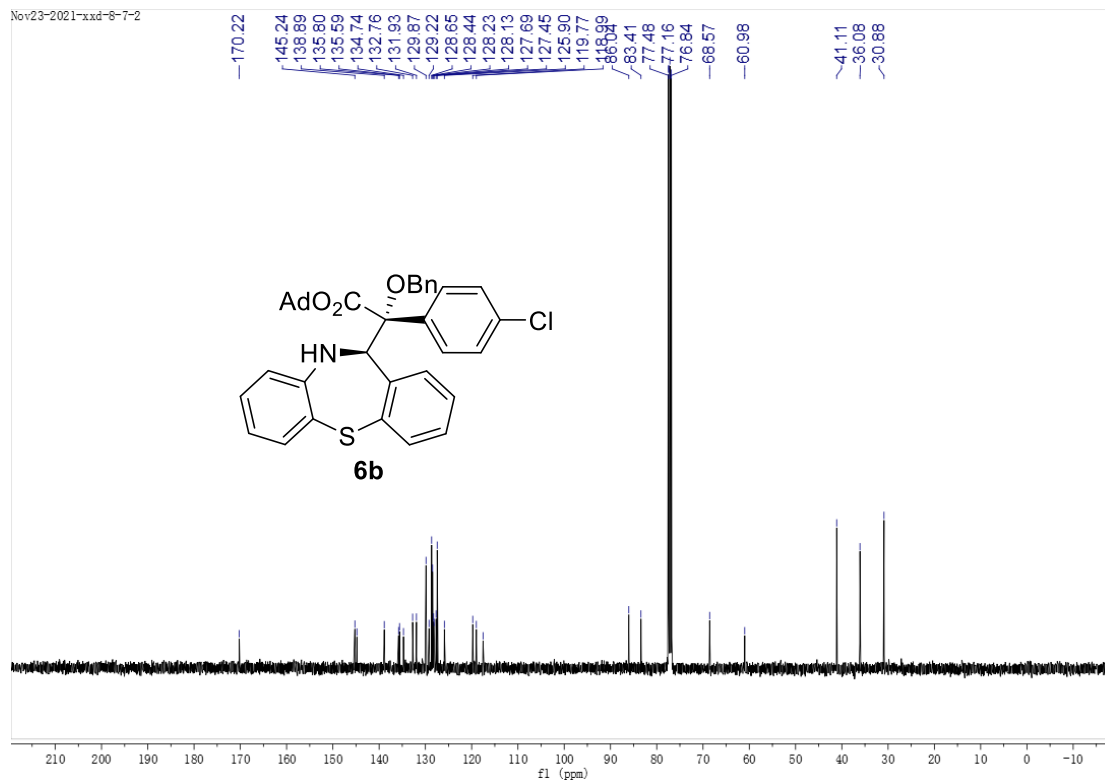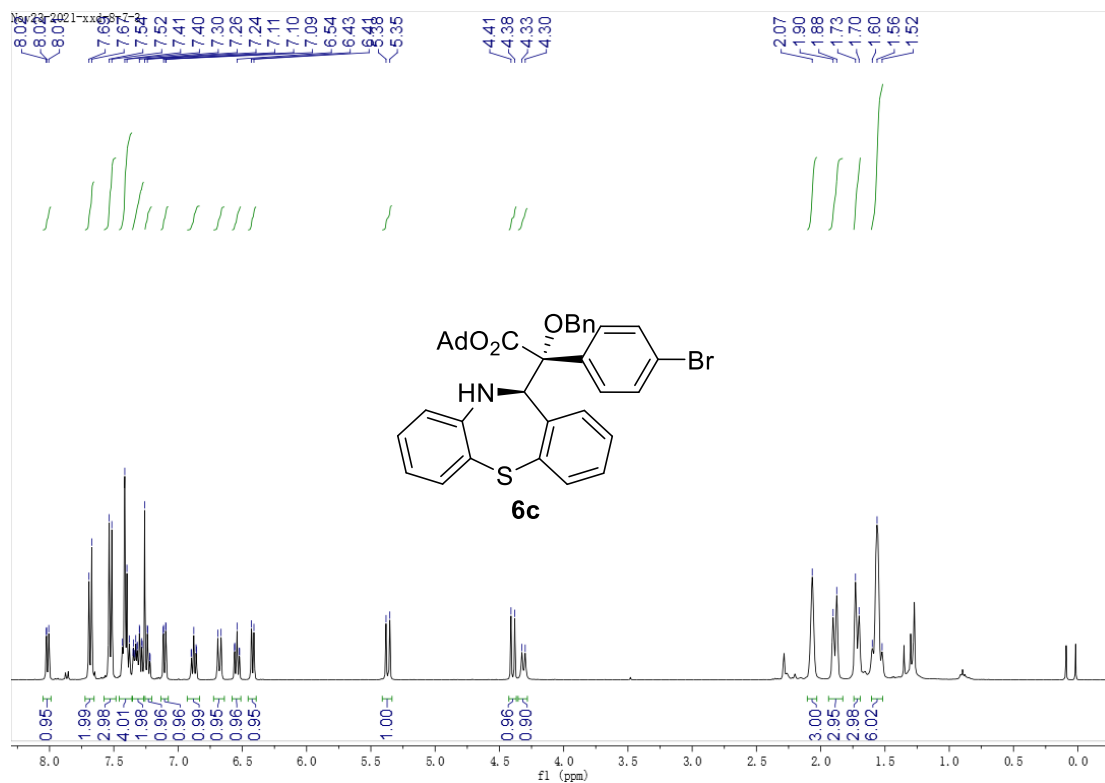

Nov23-2021-xxd-8-7-3

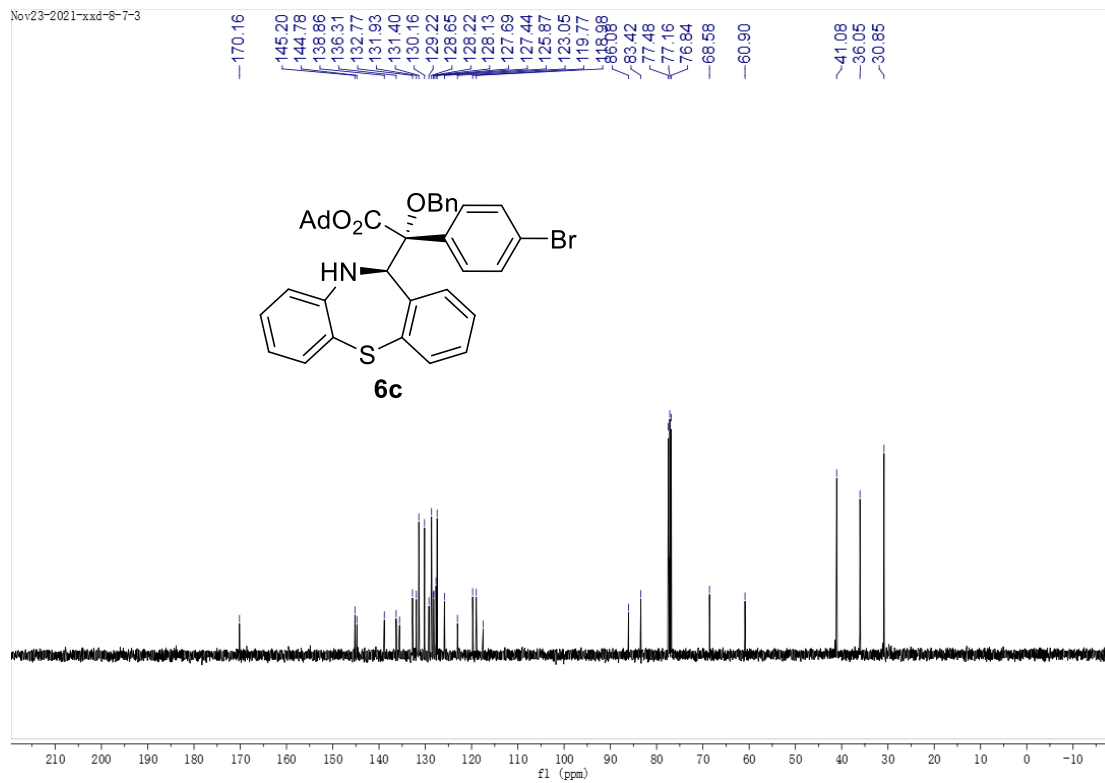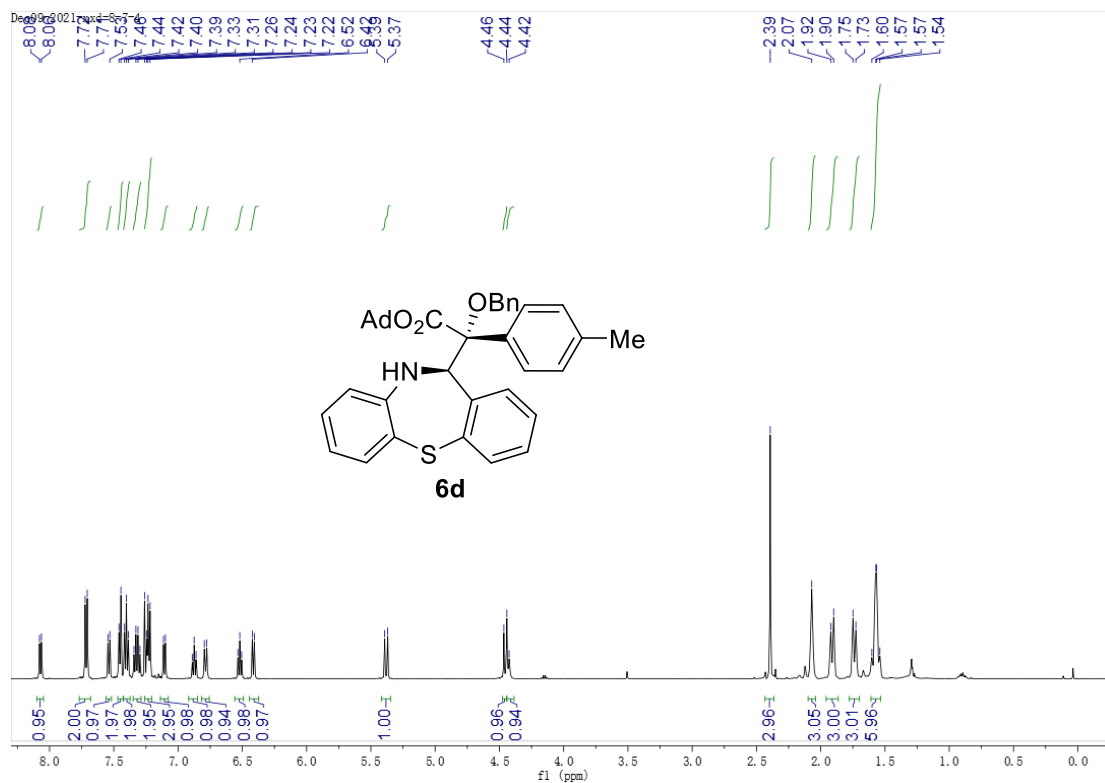

Dec09-2021-xxd-8-7-4

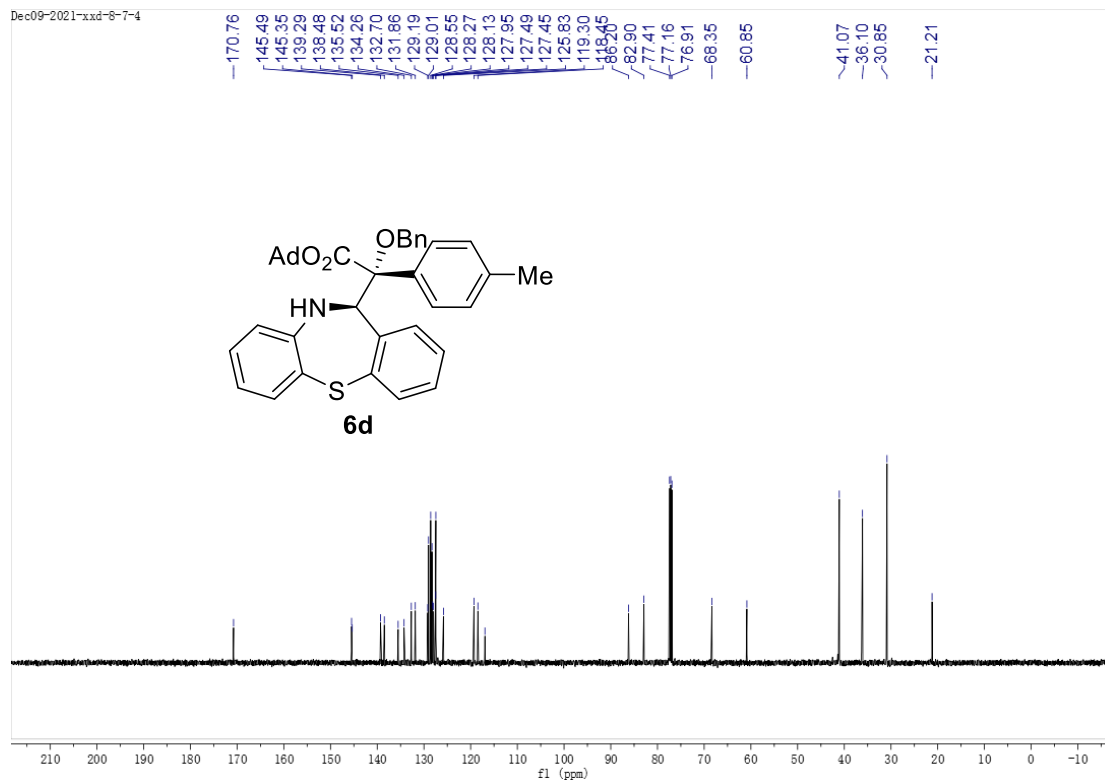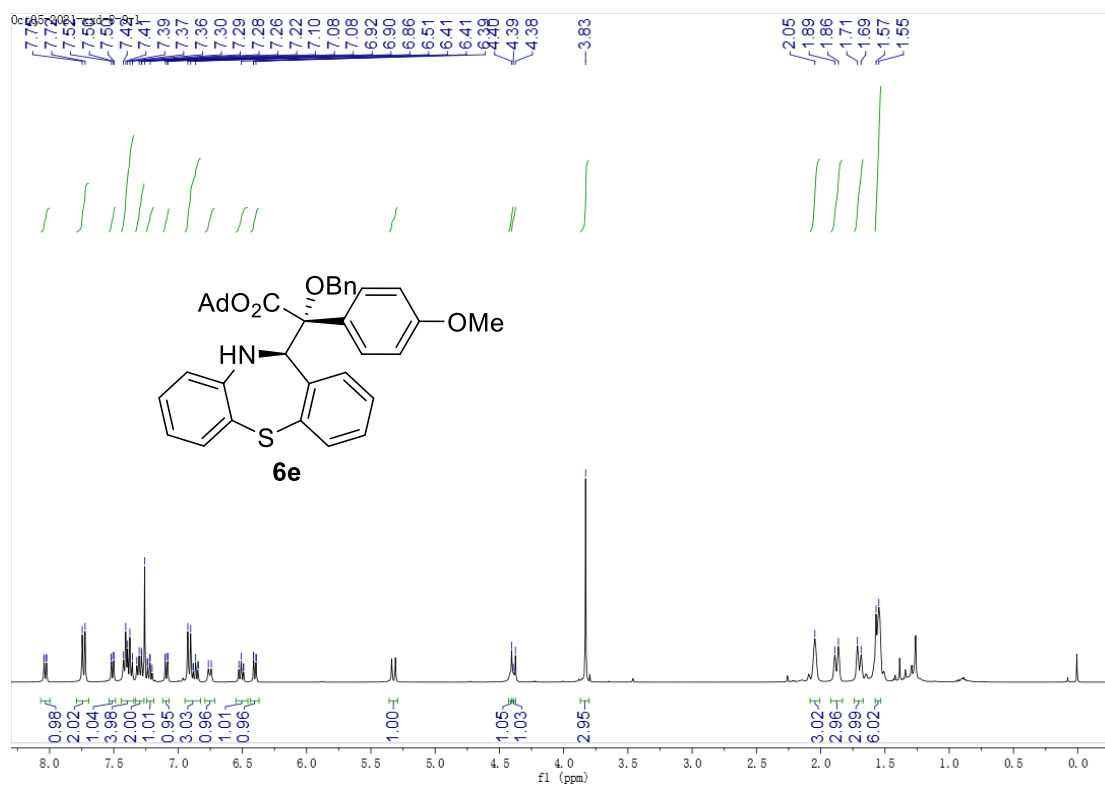



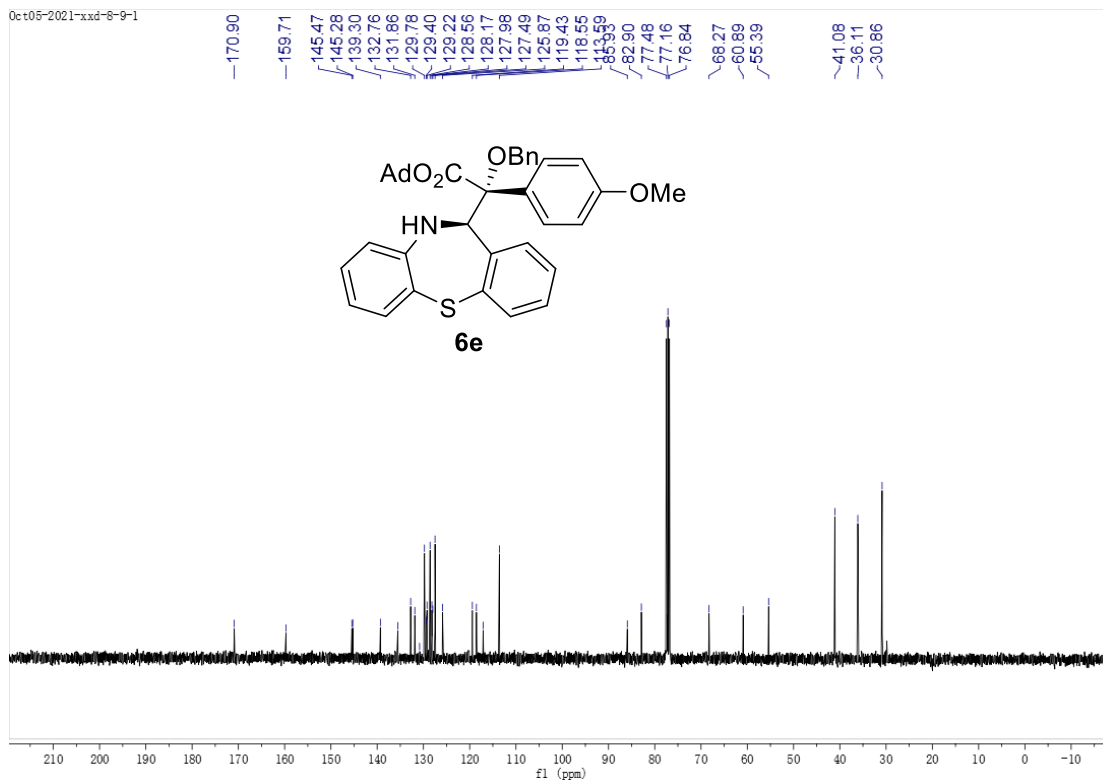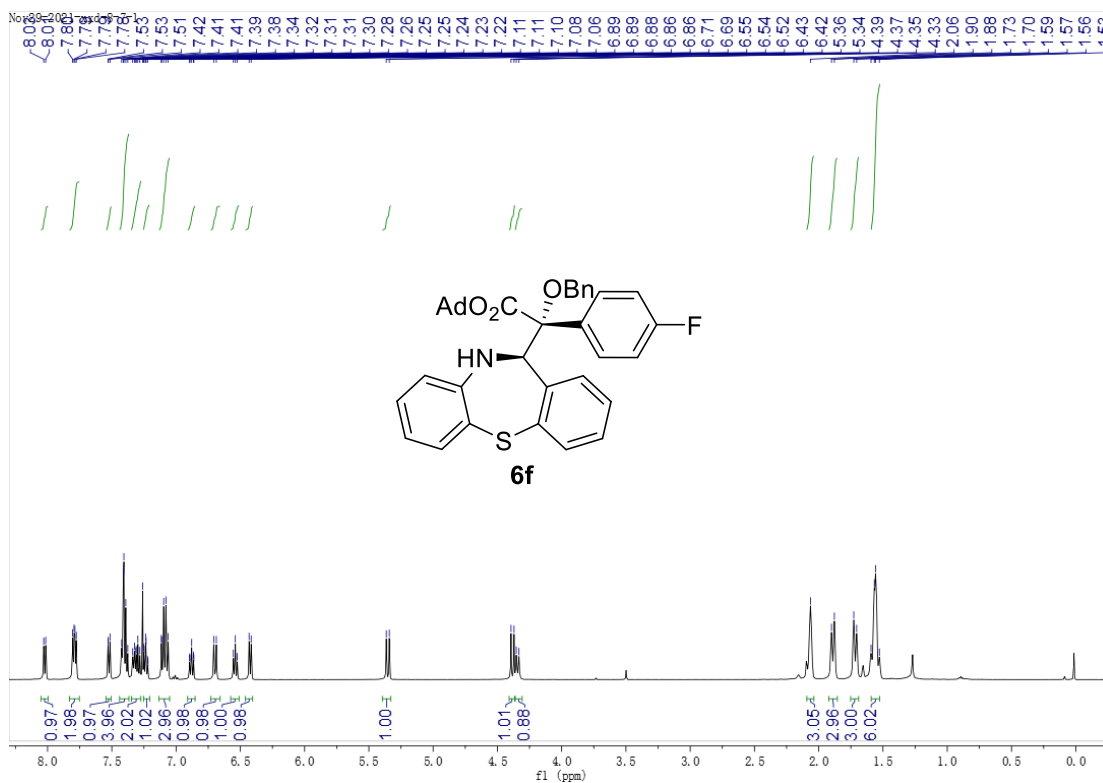

Nov29-2021-xxd-8-7-1

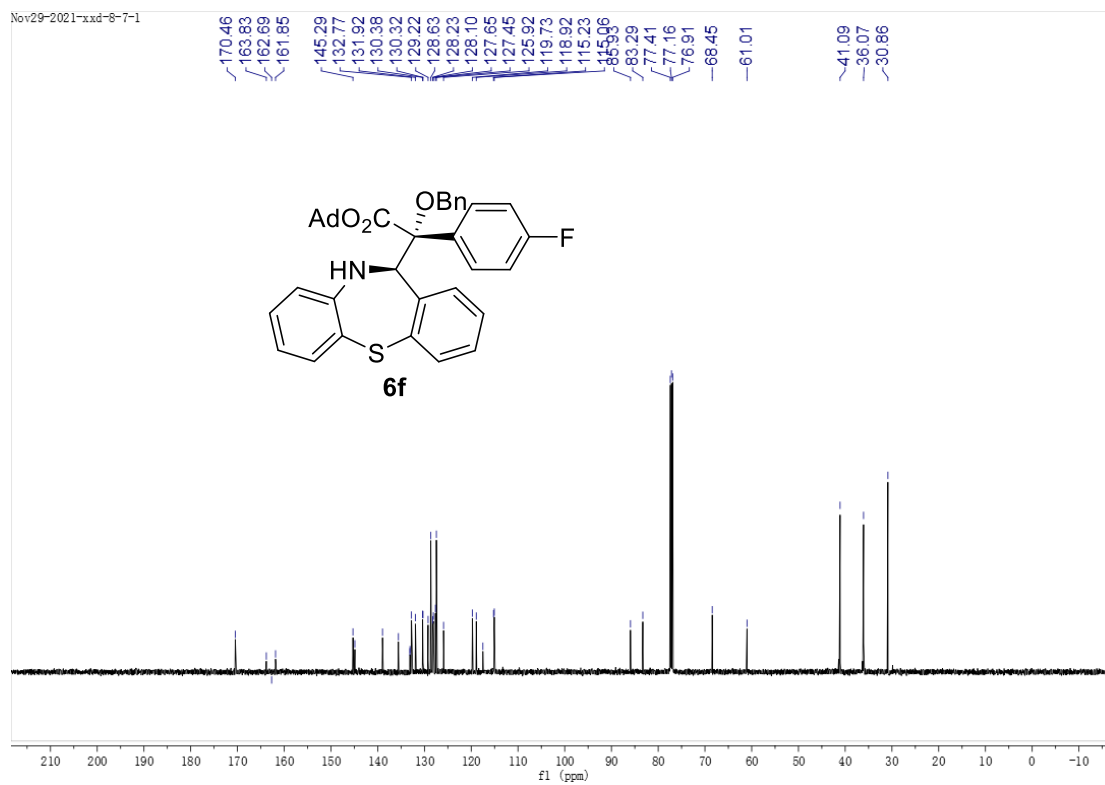

Oct06-2021-xxd-8-7-1

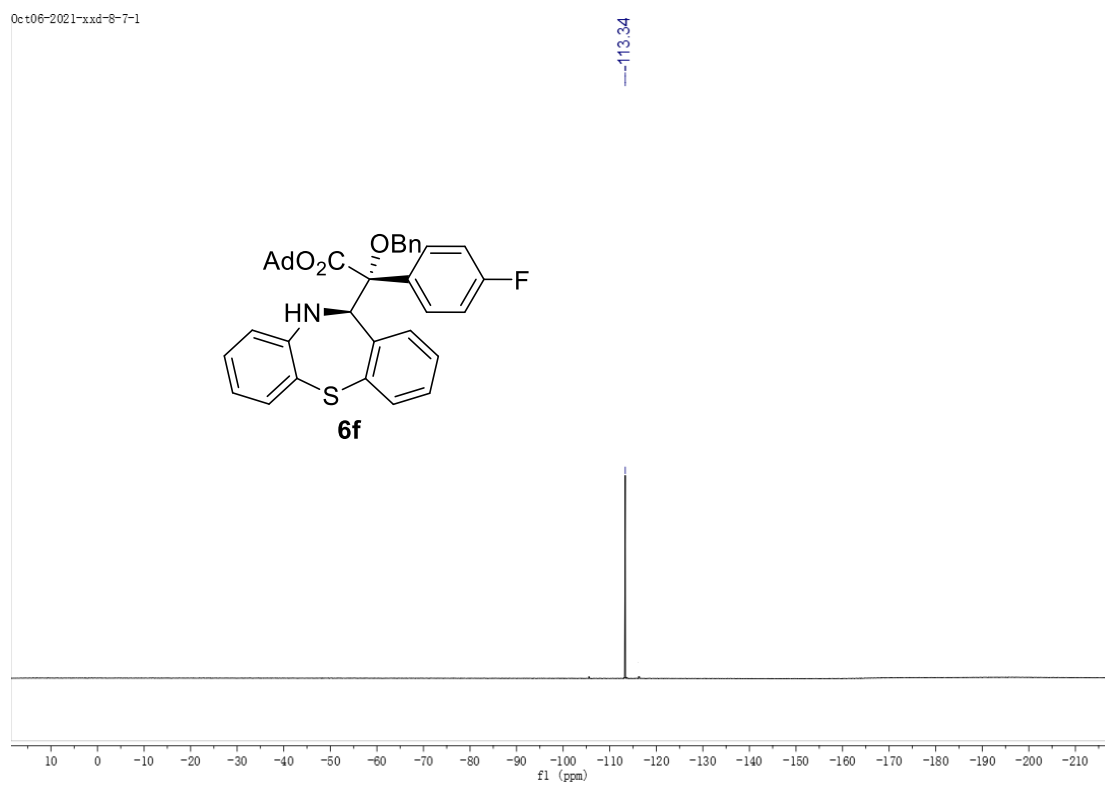

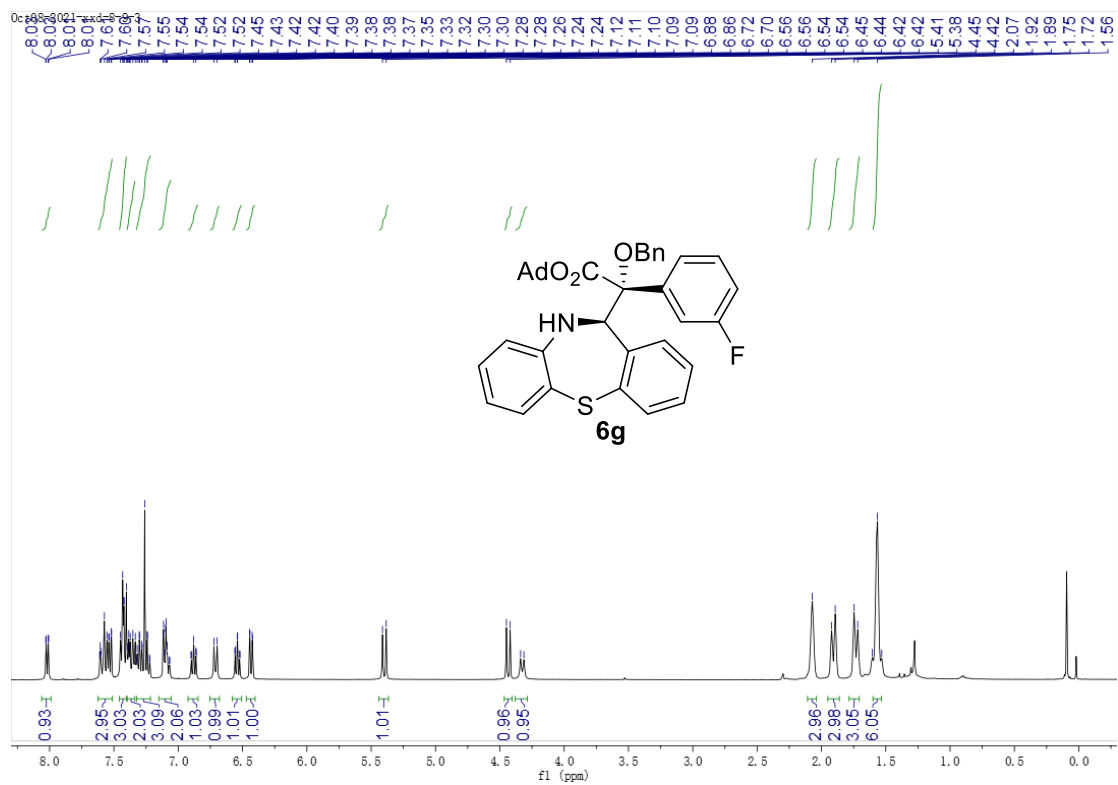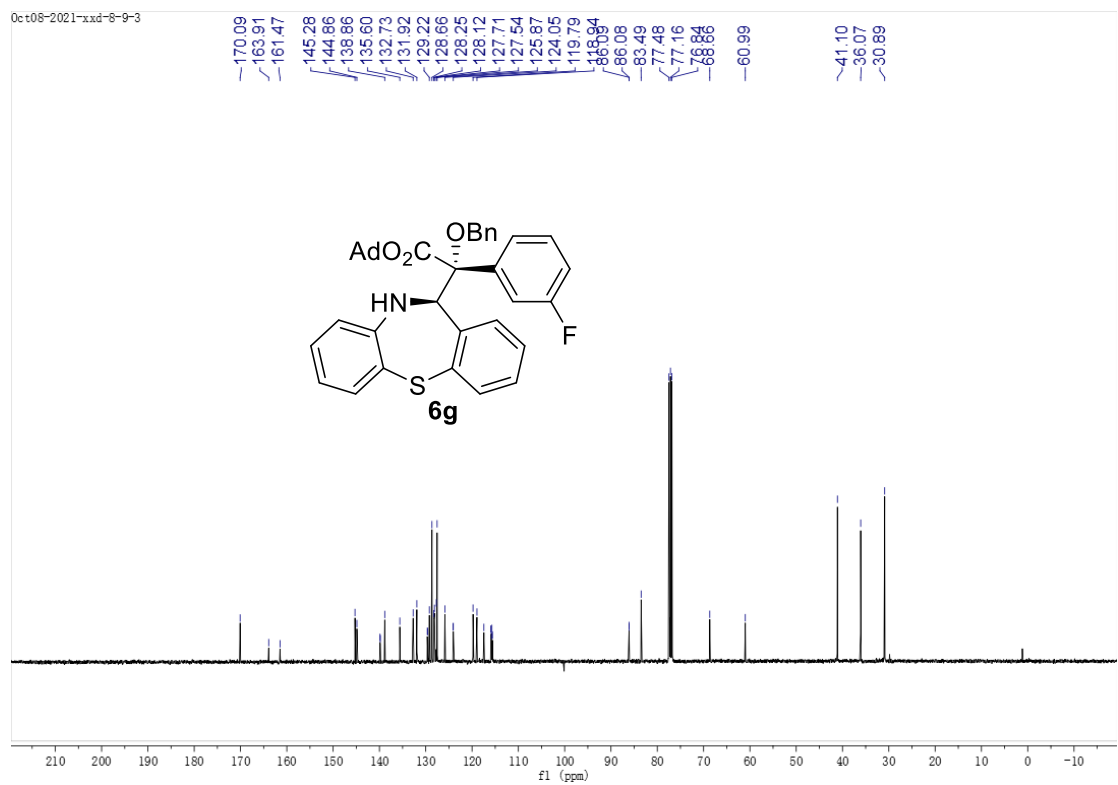

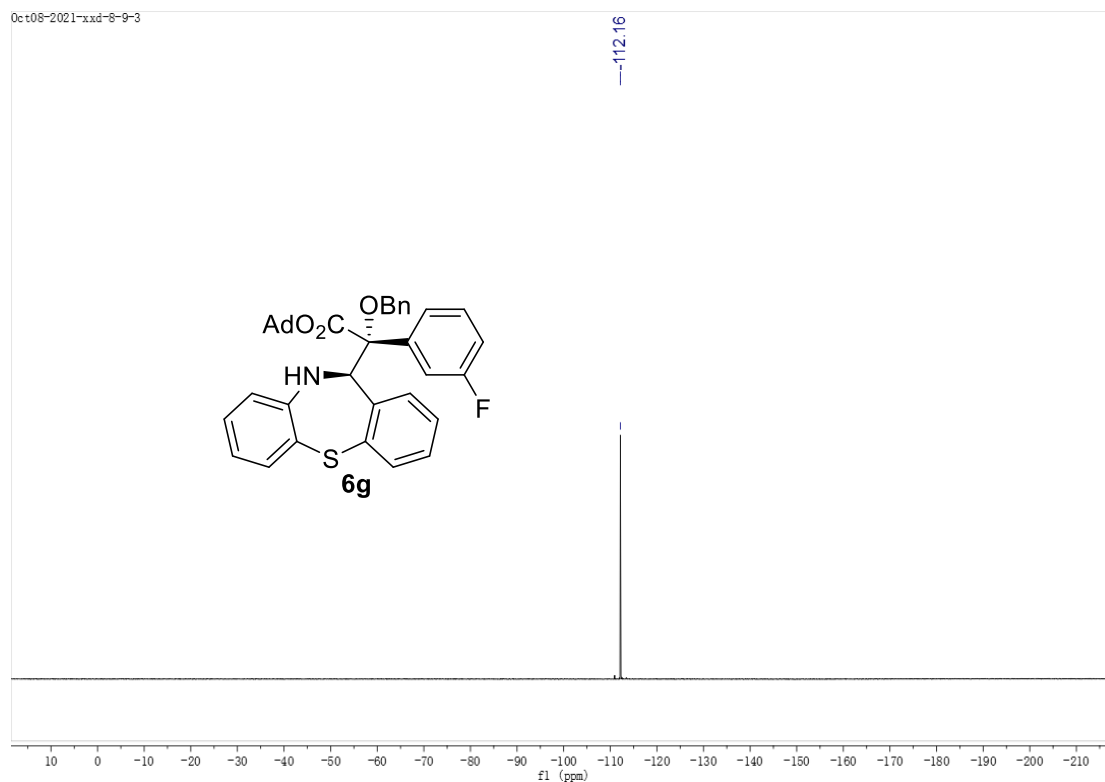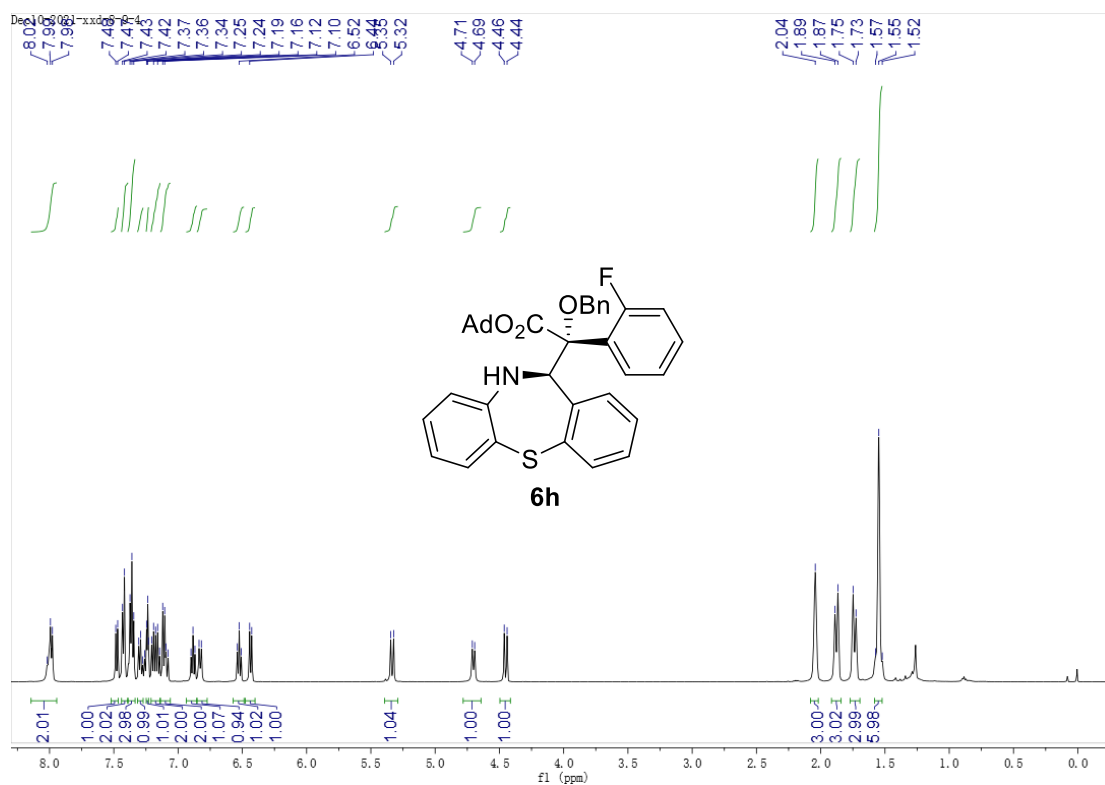

Dec10-2021-xxd-8-9-4

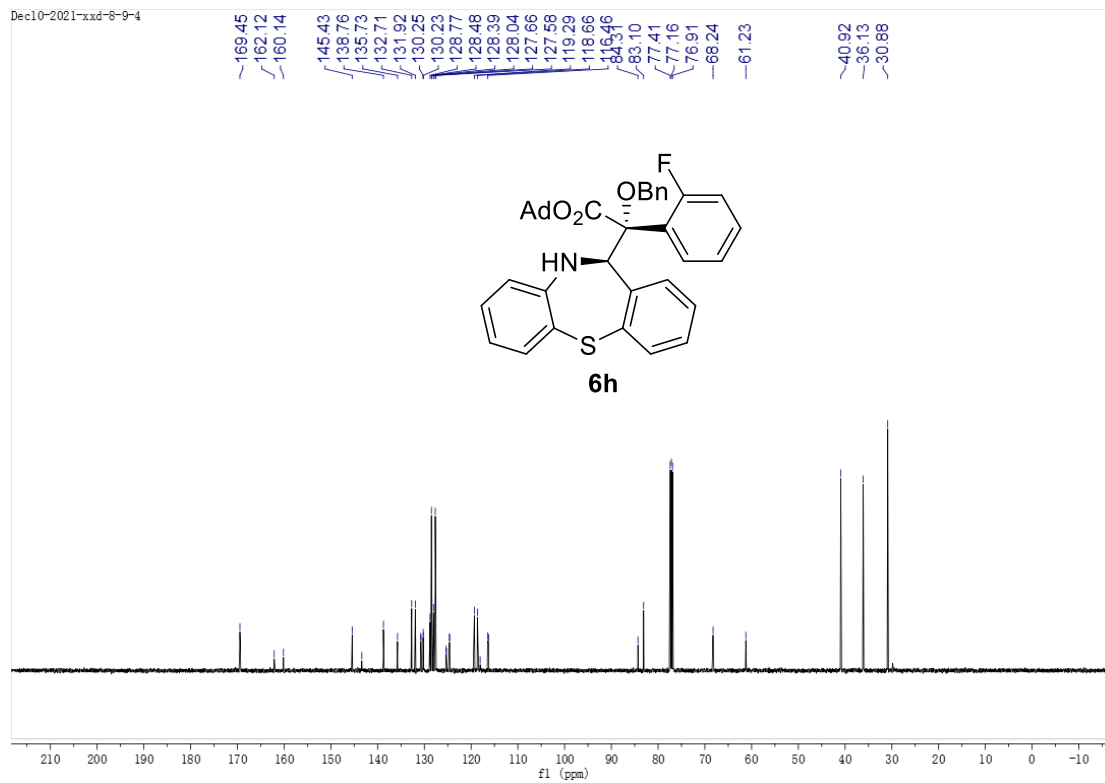

Dec10-2021-xxd-8-9-4

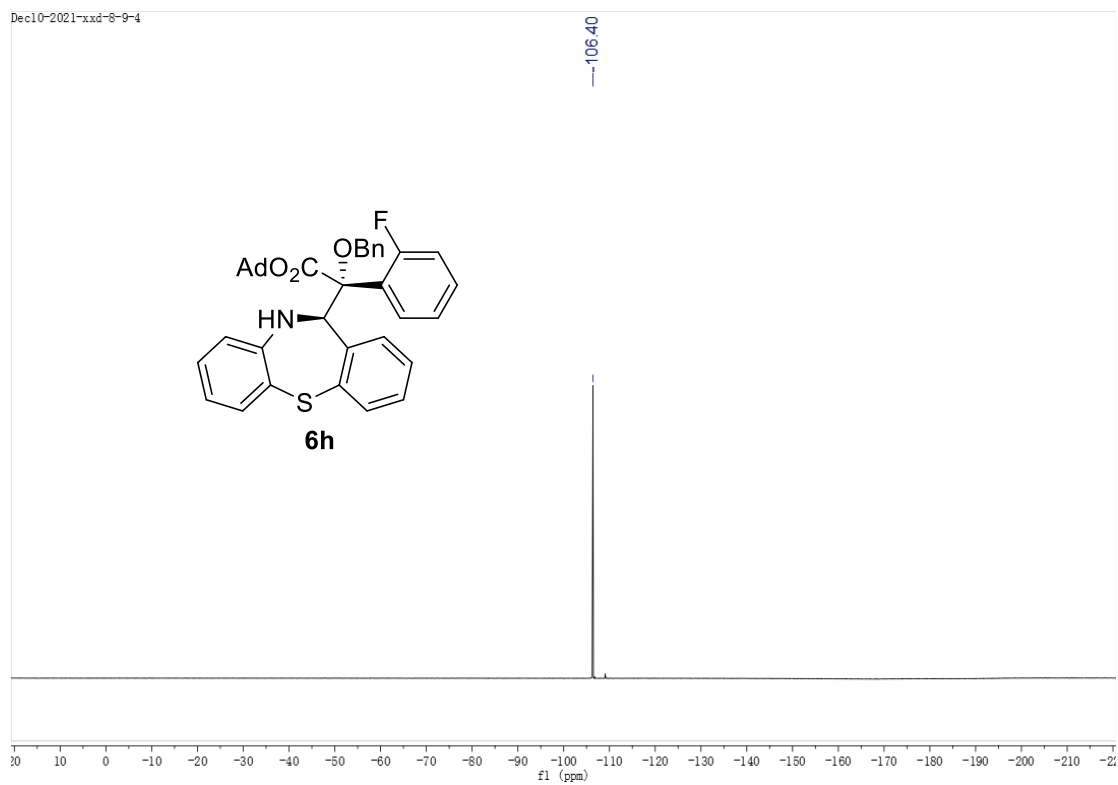

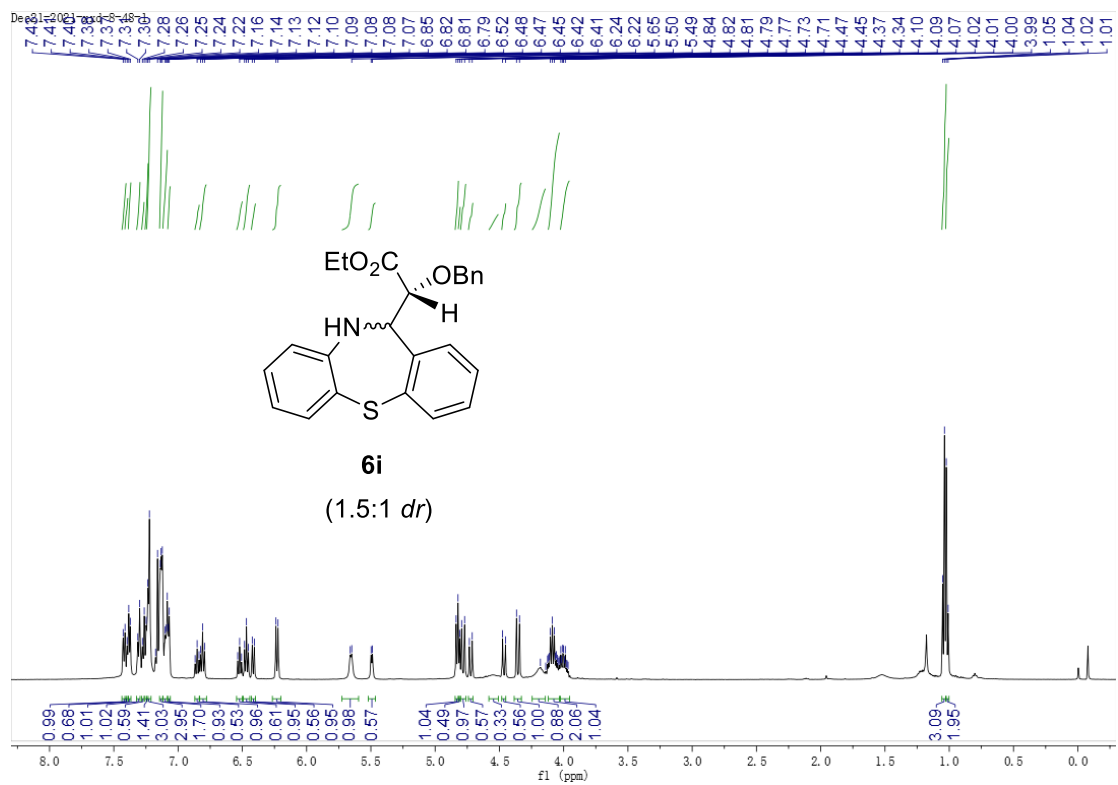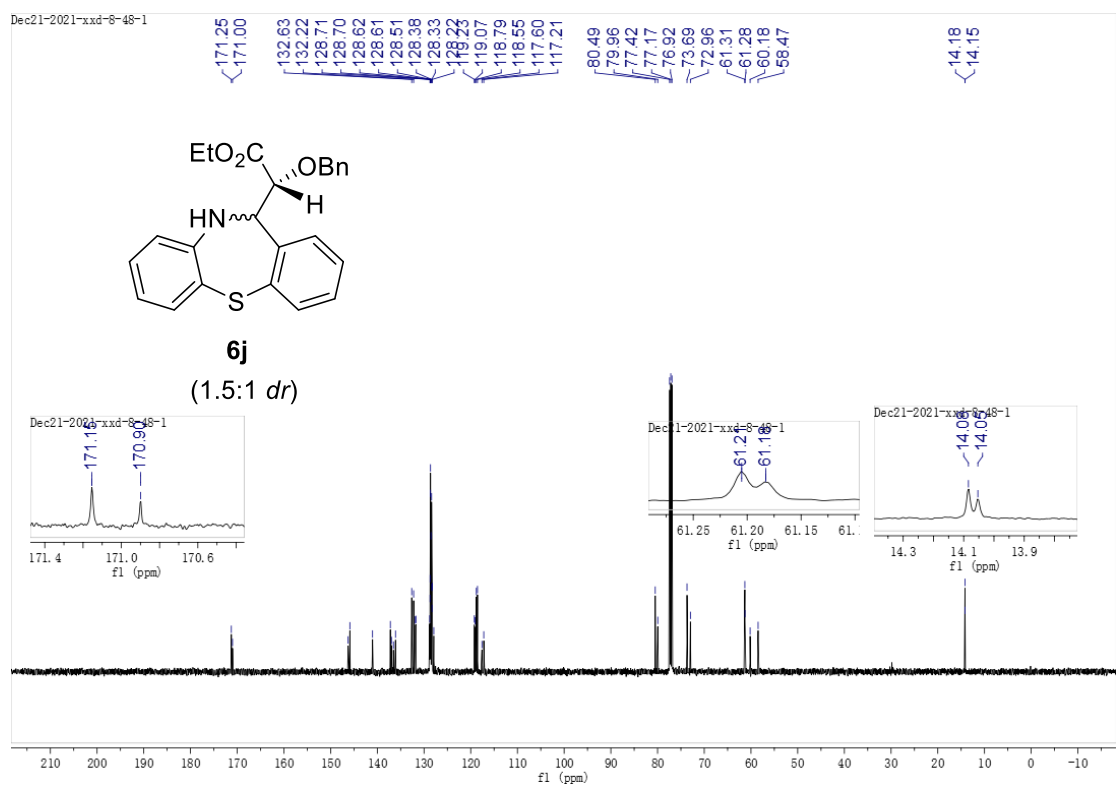

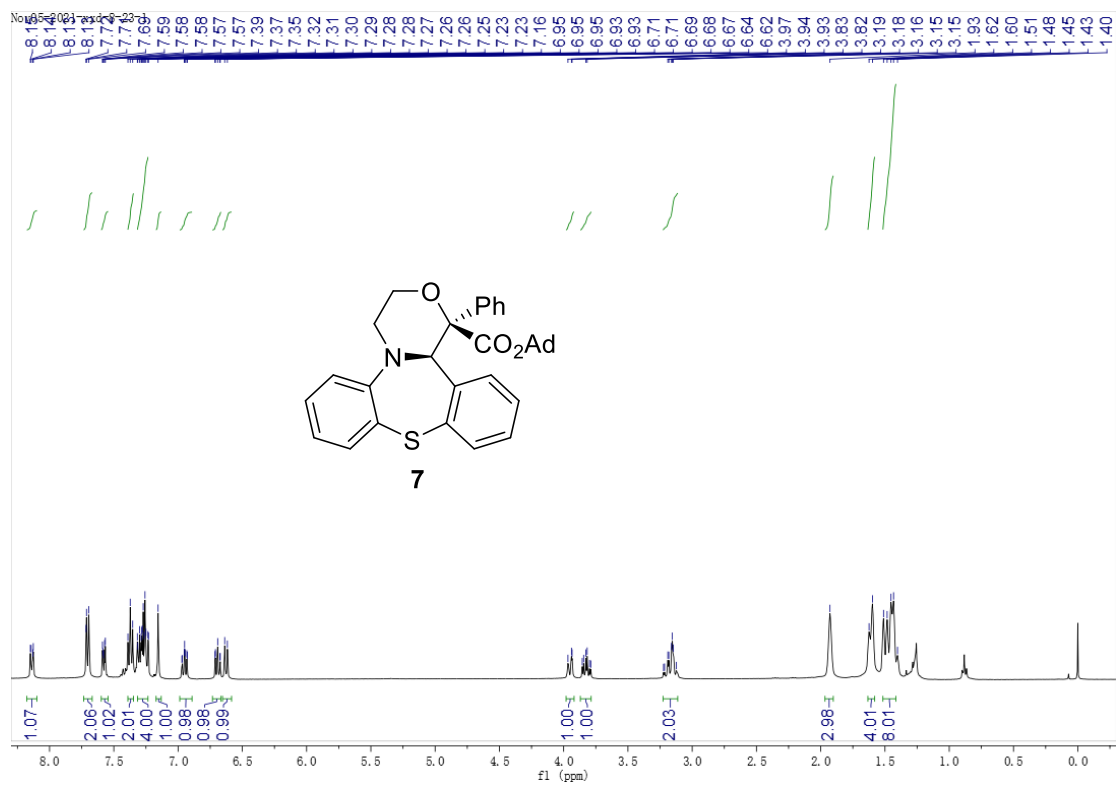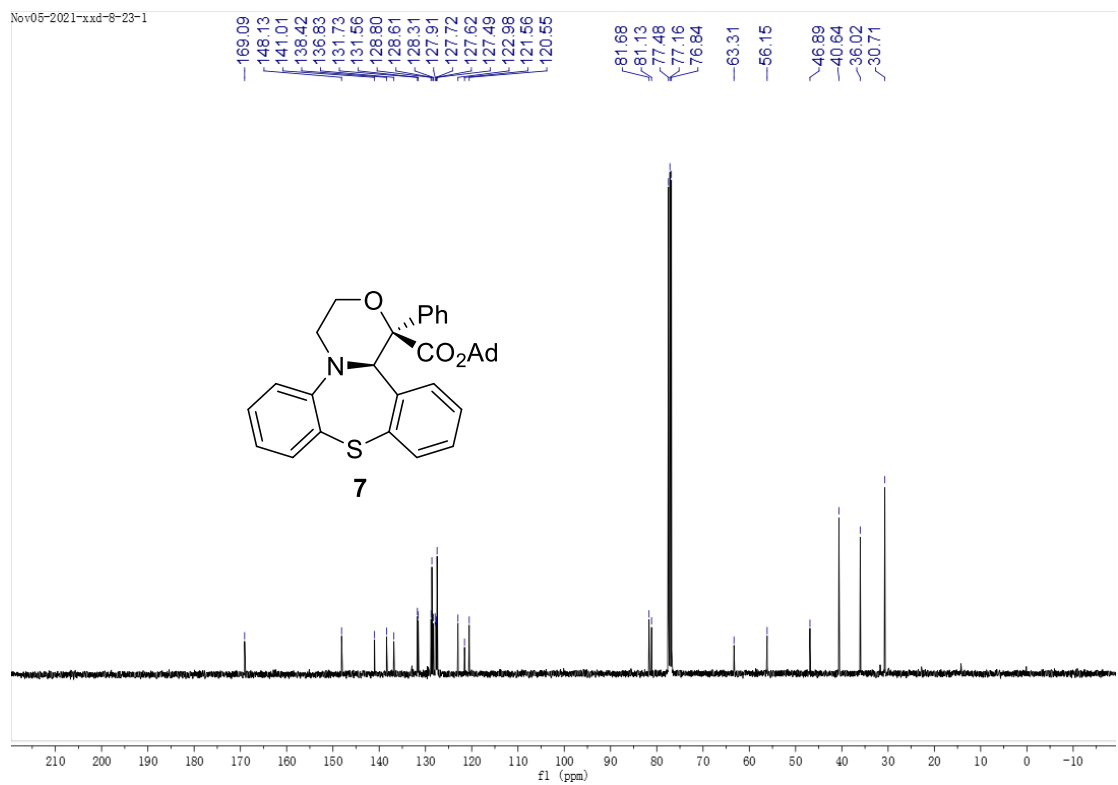

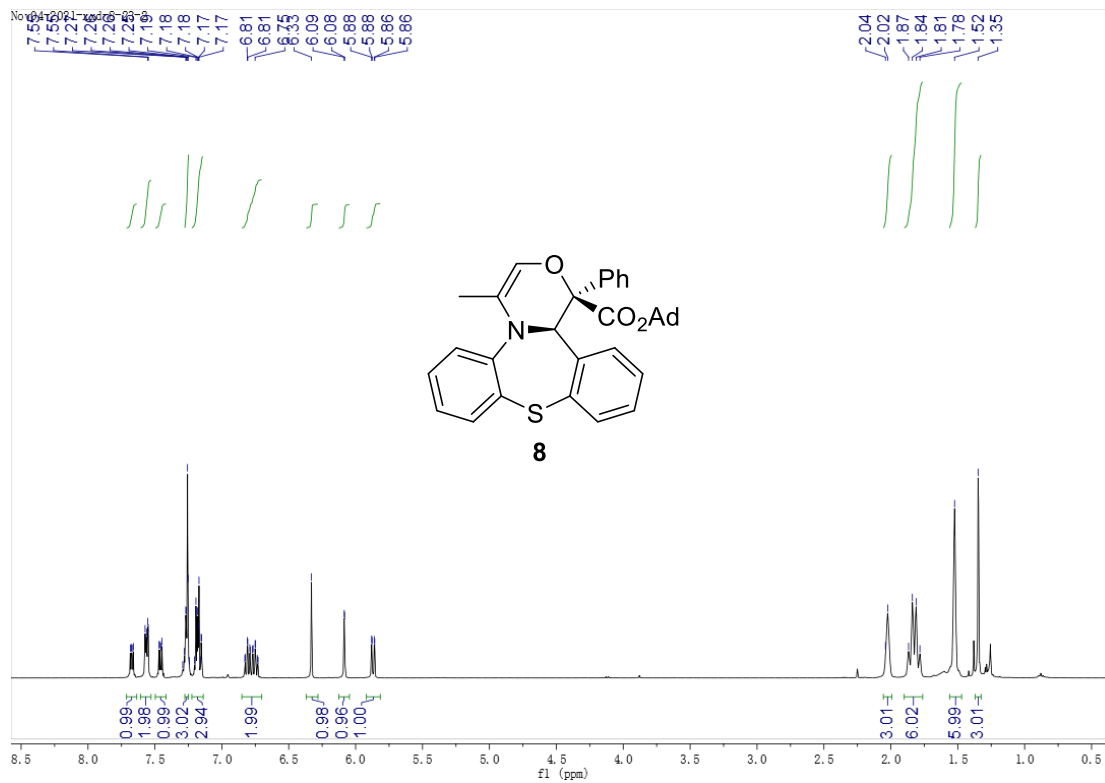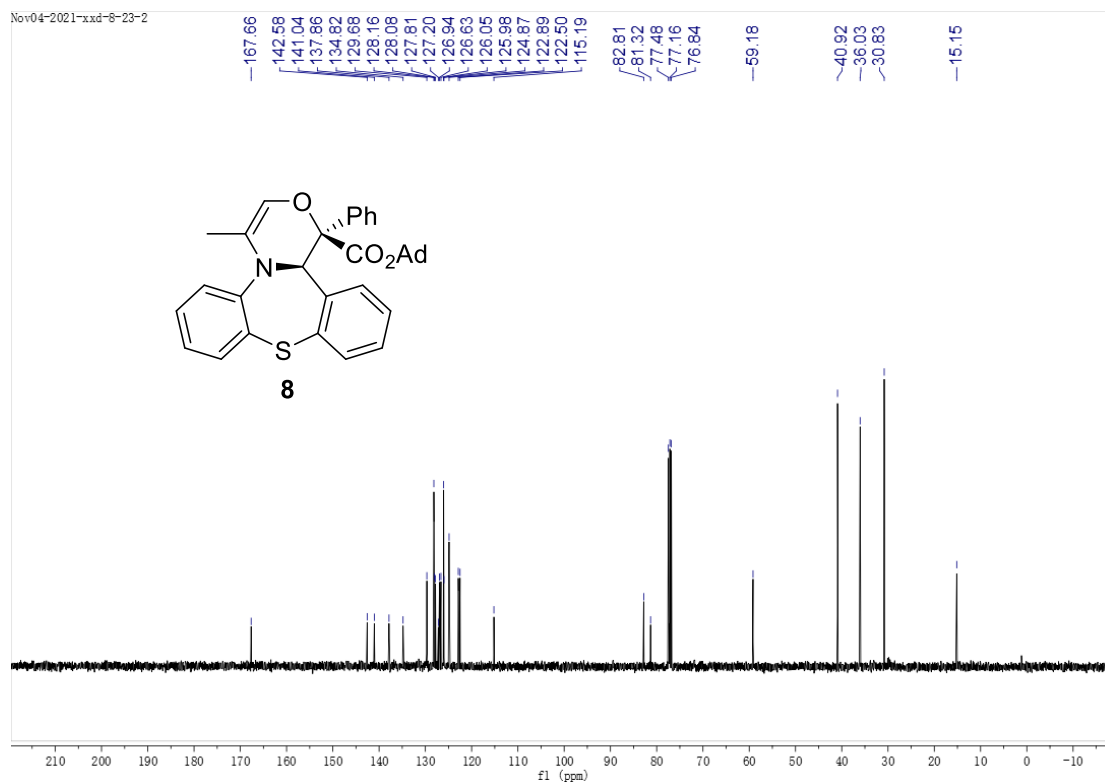



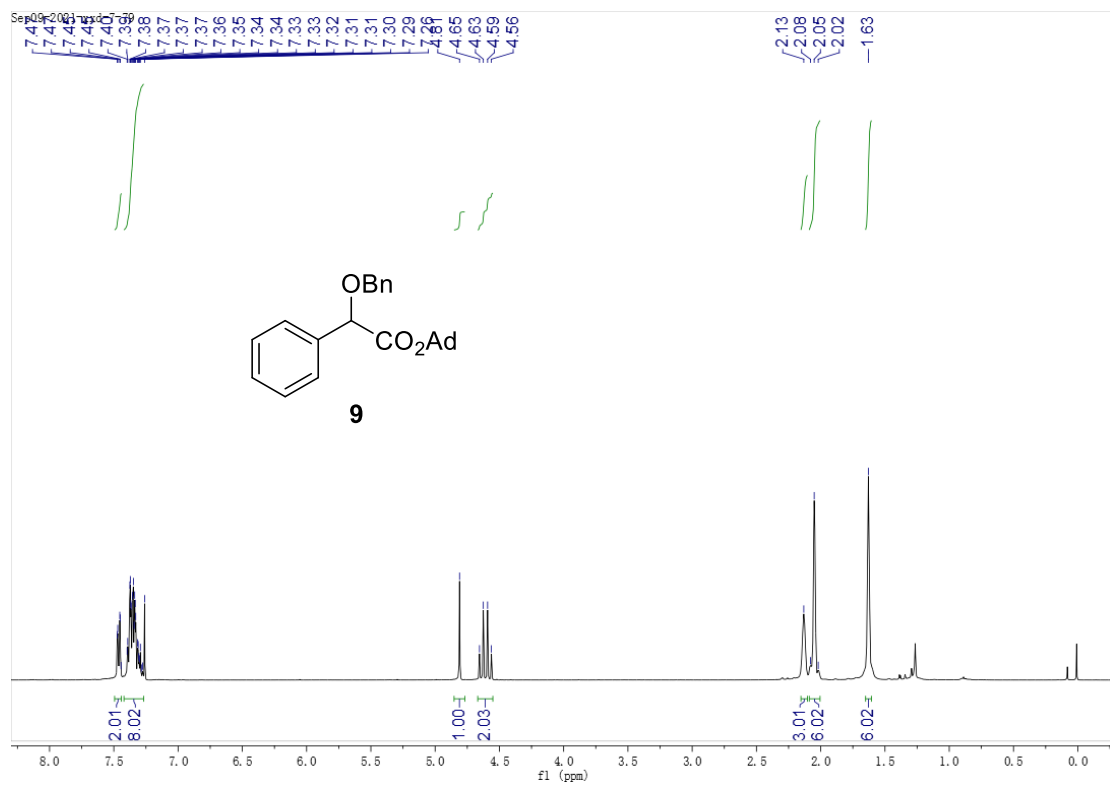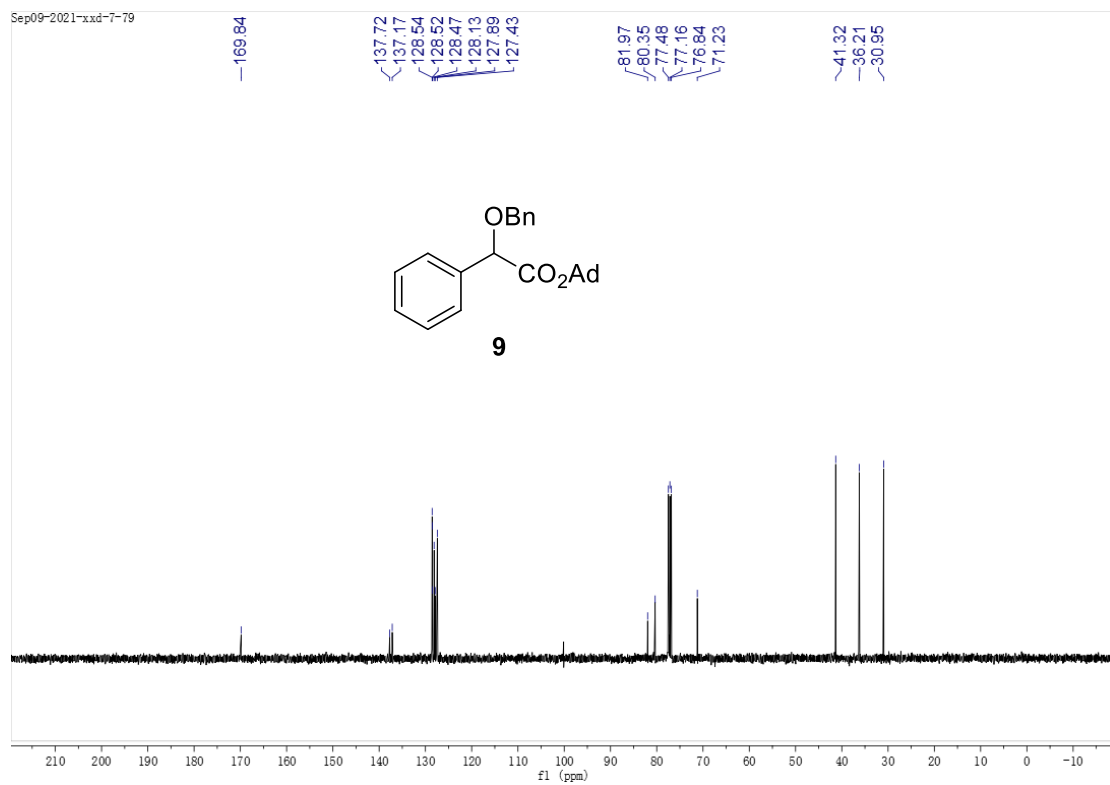

Condition: Chrial AD-H,  $\lambda = 254$  nm, hexane/isopropanol = 98:2

flow rate = 1.0 mL/min

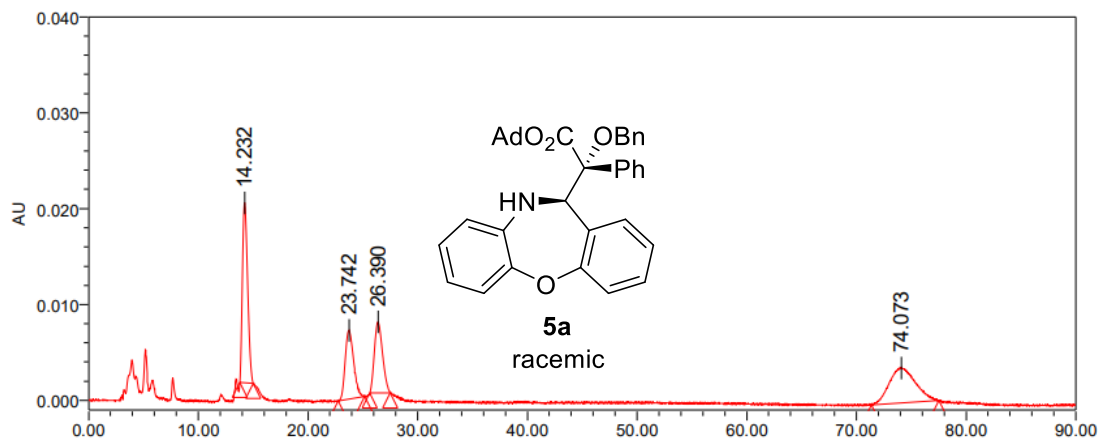

| Entry | RT min | Height mV | Area mV.sec | % Area % |
|-------|--------|-----------|-------------|----------|
| 1     | 14.232 | 18761     | 612336      | 30.91    |
| 2     | 23.742 | 7189      | 382586      | 19.31    |
| 3     | 26.391 | 7404      | 377648      | 19.06    |
| 4     | 74.073 | 3660      | 608741      | 30.72    |

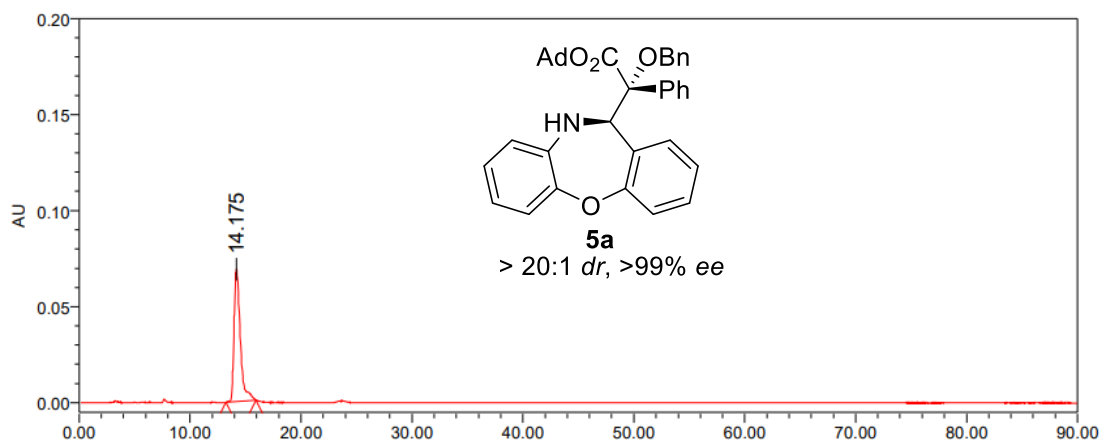

| Entry | RT min | Height mV | Area mV.sec | % Area % |
|-------|--------|-----------|-------------|----------|
| 1     | 14.175 | 69095     | 2743195     | 100.00   |

Condition: Chrial AD-H,  $\lambda = 254$  nm, hexane/isopropanol = 80:20

flow rate = 1.0 mL/min

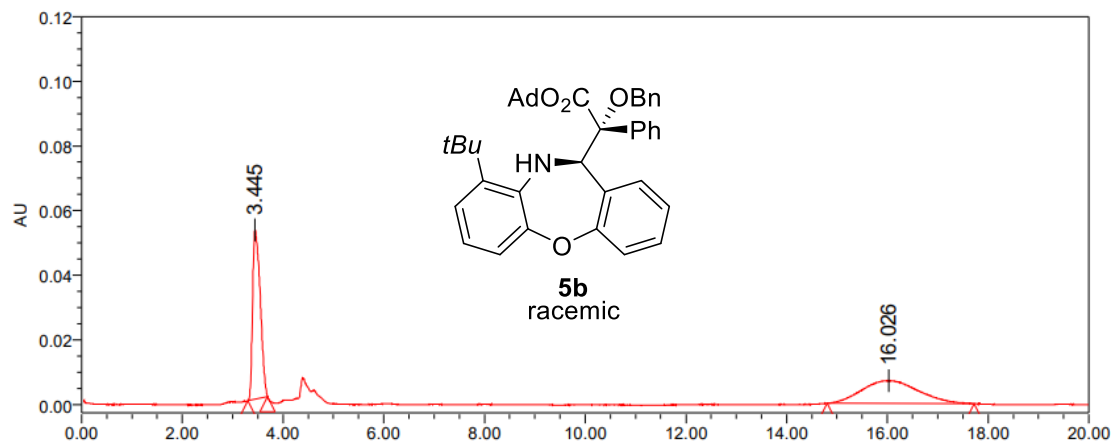

| Entry | RT min | Height mV | Area mV.sec | % Area % |
|-------|--------|-----------|-------------|----------|
| 1     | 3.445  | 52305     | 551371      | 50.11    |
| 2     | 16.026 | 7503      | 549031      | 49.89    |

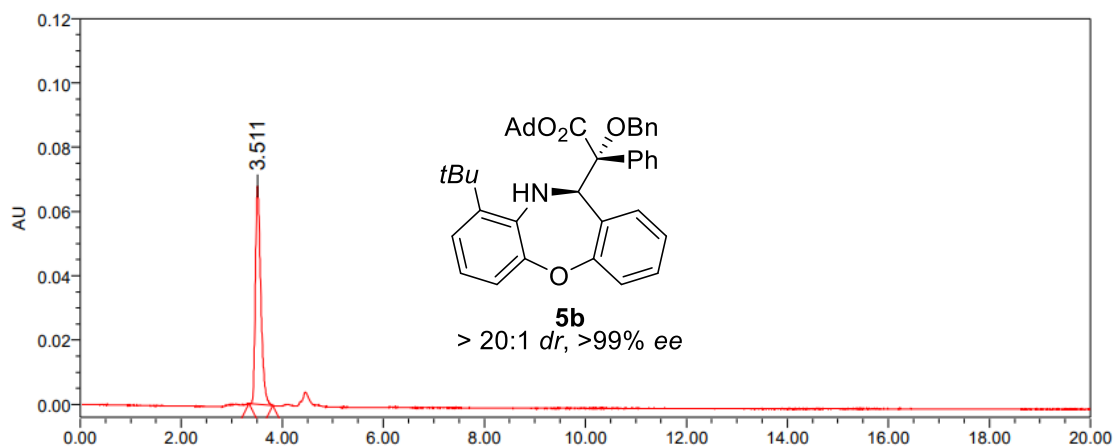

| Entry | RT min | Height mV | Area mV.sec | % Area % |
|-------|--------|-----------|-------------|----------|
| 1     | 3.511  | 29123     | 217847      | 100.00   |

Condition: Chrial AD-H,  $\lambda = 254$  nm, hexane/isopropanol = 98:2

flow rate = 1.0 mL/min

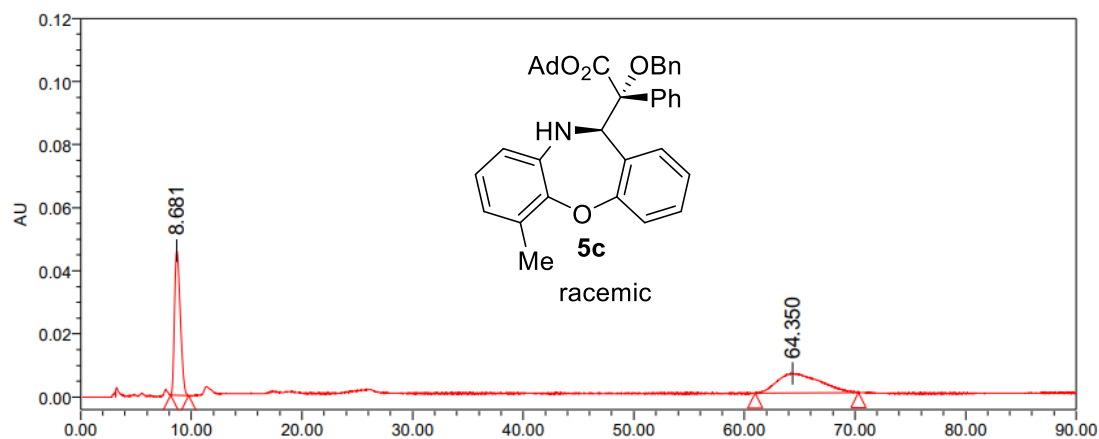

| Entry | RT min | Height mV | Area mV.sec | % Area % |
|-------|--------|-----------|-------------|----------|
| 1     | 8.681  | 45893     | 1663022     | 50.44    |
| 2     | 64.350 | 6188      | 1634225     | 49.56    |

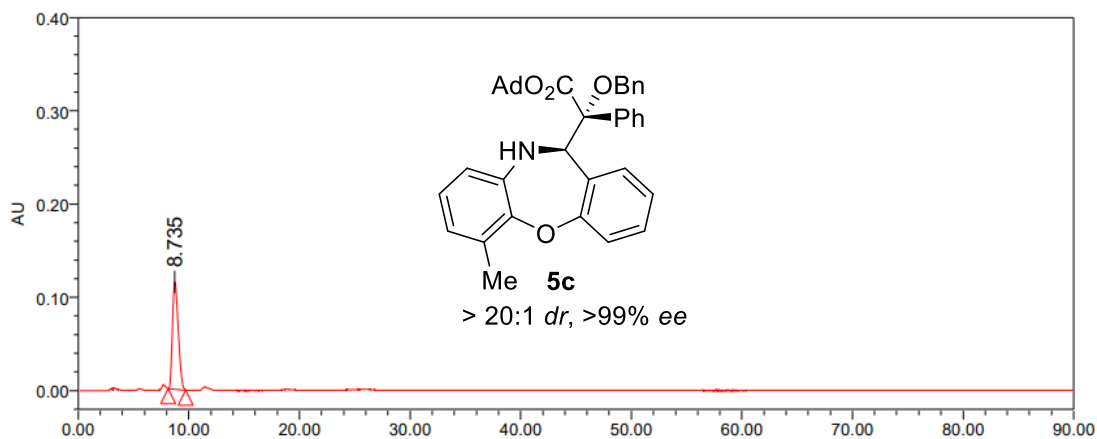

| Entry | RT min | Height mV | Area mV.sec | % Area % |
|-------|--------|-----------|-------------|----------|
| 1     | 8.735  | 114944    | 4179305     | 100.00   |

Condition: Chrial AD-H,  $\lambda = 254$  nm, hexane/isopropanol = 80:20

flow rate = 1.0 mL/min

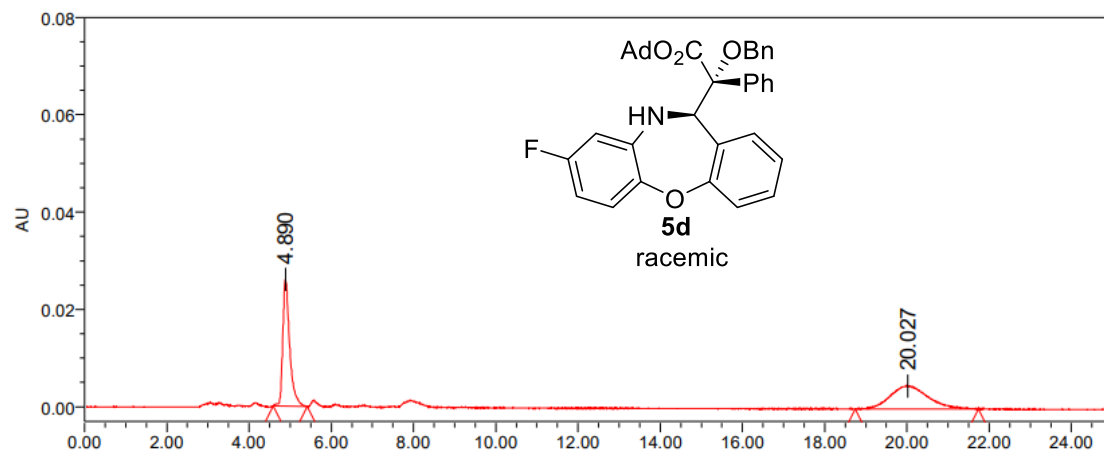

| Entry | RT min | Height mV | Area mV.sec | % Area % |
|-------|--------|-----------|-------------|----------|
| 1     | 4.890  | 26024     | 303827      | 50.36    |
| 2     | 20.027 | 4701      | 299528      | 49.64    |

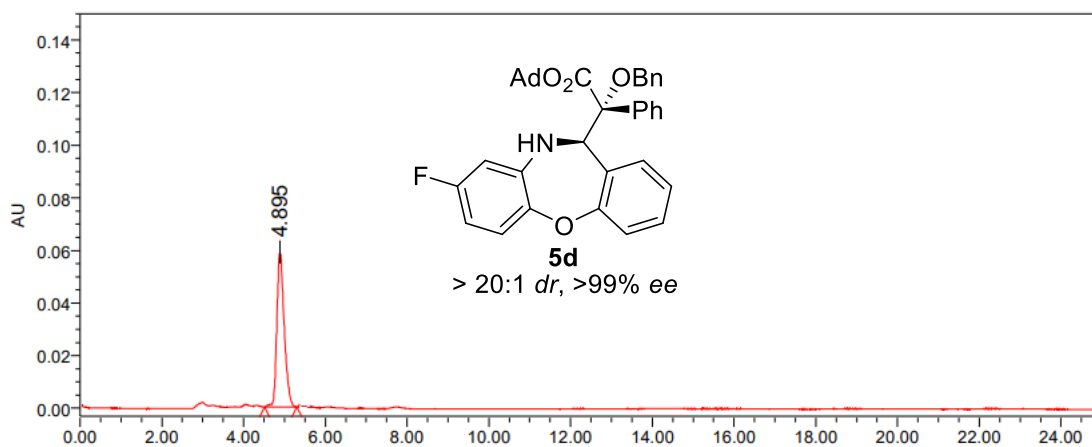

| Entry | RT min | Height mV | Area mV.sec | % Area % |
|-------|--------|-----------|-------------|----------|
| 1     | 4.895  | 58931     | 741141      | 100.00   |

Condition: Chrial AD-H,  $\lambda = 317$  nm, hexane/isopropanol = 80:20

flow rate = 1.0 mL/min

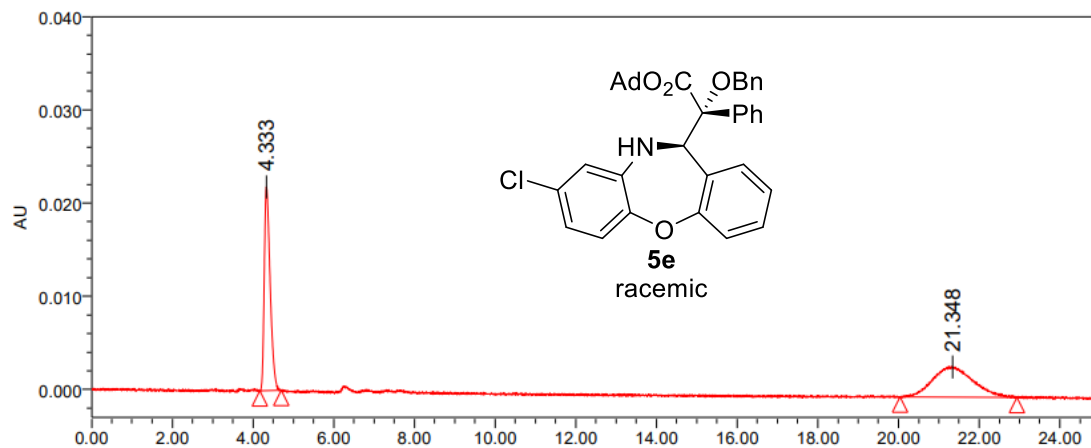

| Entry | RT min | Height mV | Area mV.sec | % Area % |
|-------|--------|-----------|-------------|----------|
| 1     | 4.333  | 21866     | 218672      | 49.44    |
| 2     | 21.305 | 3215      | 50.56       | 50.56    |

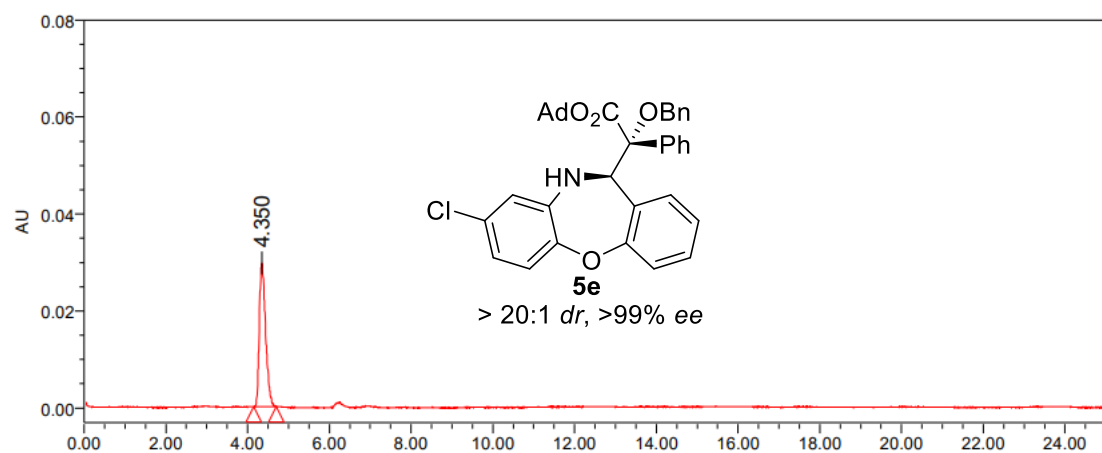

| Entry | RT min | Height mV | Area mV.sec | % Area % |
|-------|--------|-----------|-------------|----------|
| 1     | 4.350  | 29603     | 317698      | 100.00   |

Condition: Chrial AD-H,  $\lambda = 254$  nm, hexane/isopropanol = 80:20

flow rate = 1.0 mL/min

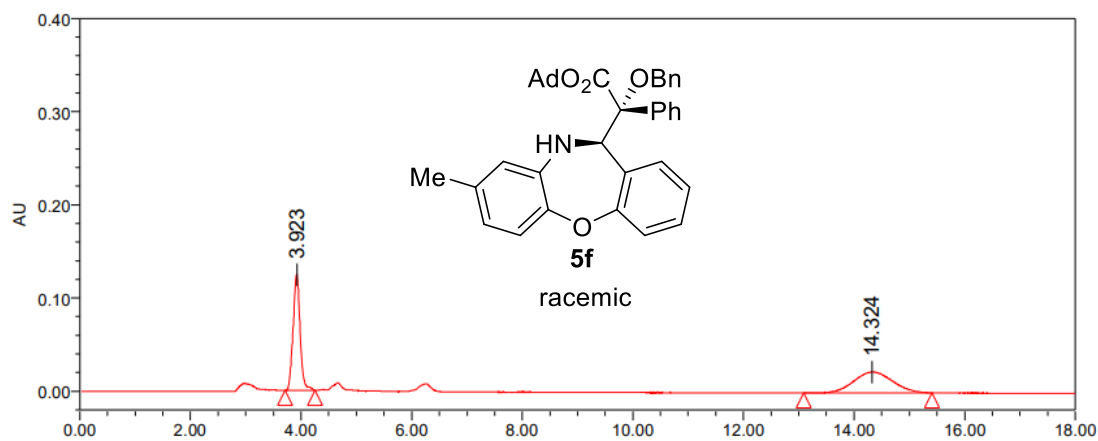

| Entry | RT min | Height mV | Area mV.sec | % Area % |
|-------|--------|-----------|-------------|----------|
| 1     | 3.923  | 124297    | 1099742     | 50.11    |
| 2     | 14.324 | 22340     | 1095046     | 23.27    |

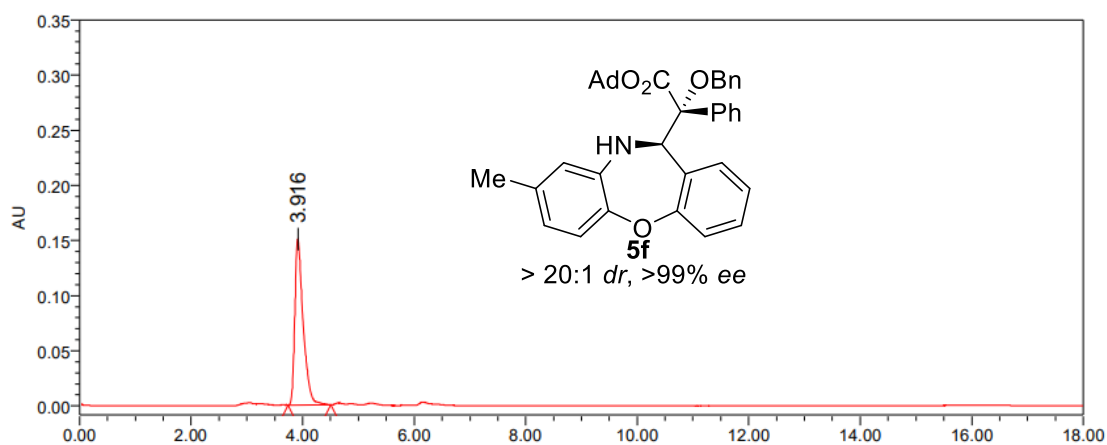

| Entry | RT min | Height mV | Area mV.sec | % Area % |
|-------|--------|-----------|-------------|----------|
| 1     | 3.916  | 150693    | 1574137     | 100.00   |

Condition: Chrial AD-H,  $\lambda = 266$  nm, hexane/isopropanol = 80:20

flow rate = 1.0 mL/min

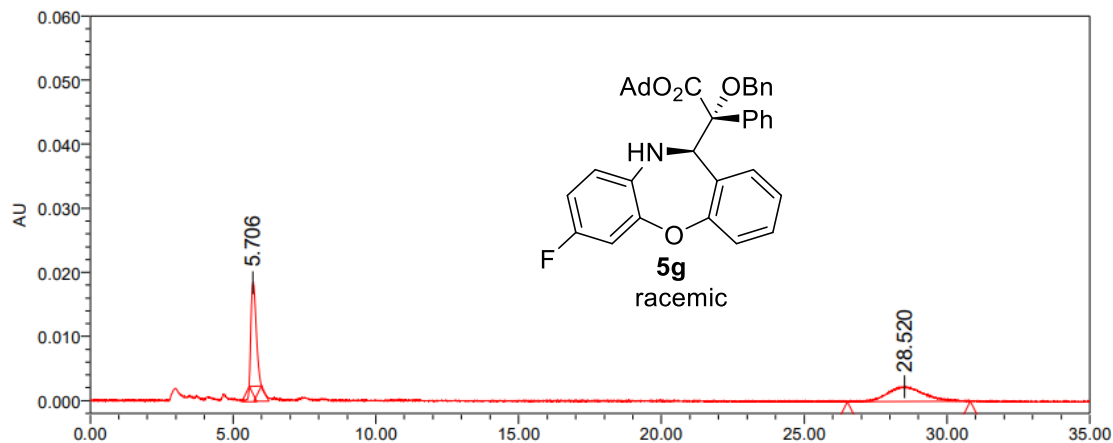

| Entry | RT min | Height mV | Area mV.sec | % Area % |
|-------|--------|-----------|-------------|----------|
| 1     | 5.706  | 16175     | 201639      | 50.51    |
| 2     | 28.520 | 2272      | 197568      | 49.49    |

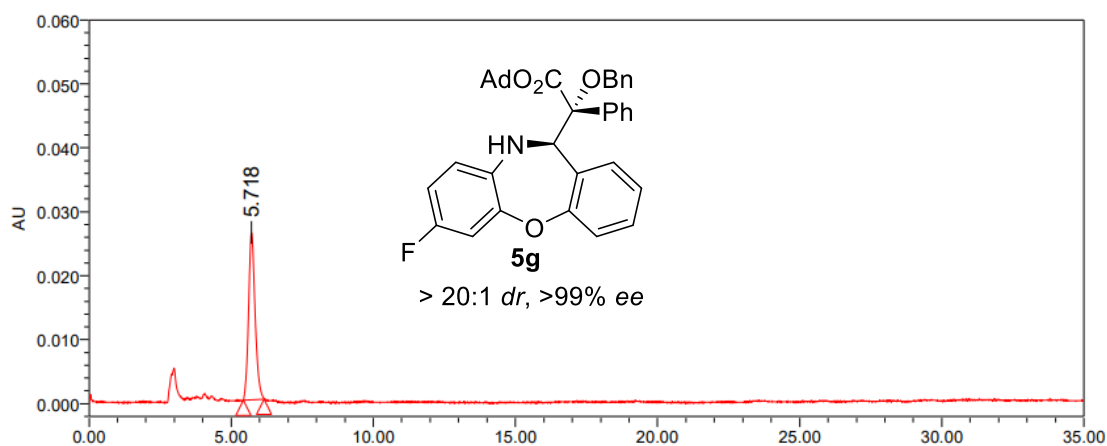

| Entry | RT min | Height mV | Area mV.sec | % Area % |
|-------|--------|-----------|-------------|----------|
| 1     | 5.718  | 26317     | 411298      | 100.00   |



Condition: Chrial AD-H,  $\lambda = 217$  nm, hexane/isopropanol = 80:20

flow rate = 1.0 mL/min

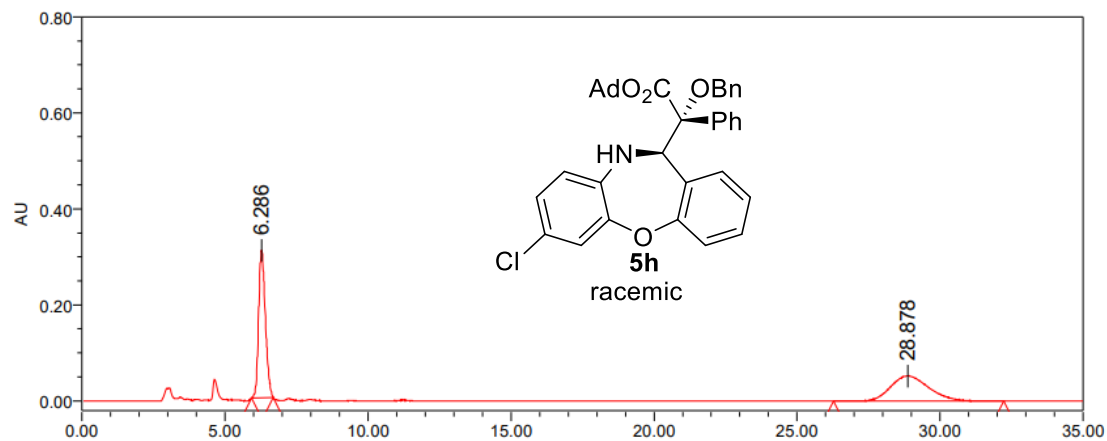

| Entry | RT min | Height mV | Area mV.sec | % Area % |
|-------|--------|-----------|-------------|----------|
| 1     | 6.286  | 307432    | 5079285     | 50.79    |
| 2     | 28.878 | 52533     | 4921793     | 49.21s   |

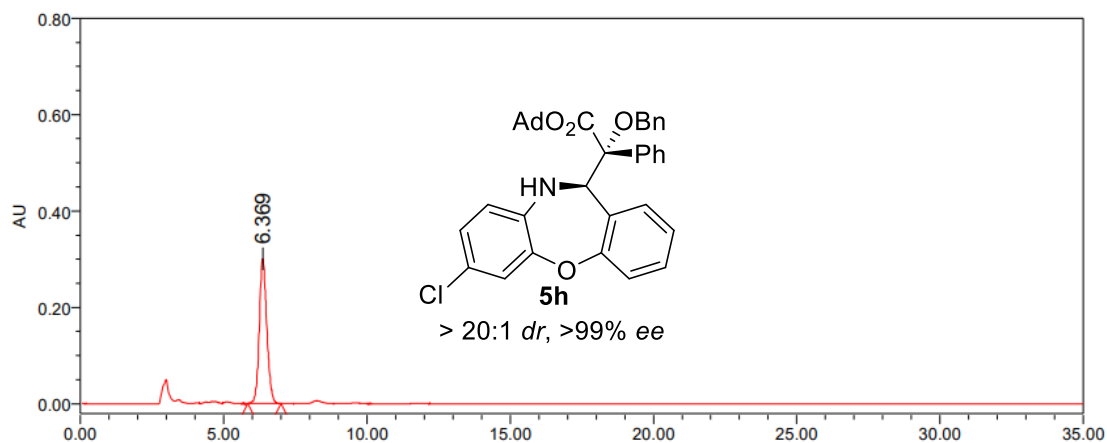

| Entry | RT min | Height mV | Area mV.sec | % Area % |
|-------|--------|-----------|-------------|----------|
| 1     | 6.369  | 300284    | 5484165     | 100.00   |

Condition: Chrial AD-H,  $\lambda = 254$  nm, hexane/isopropanol = 80:20

flow rate = 1.0 mL/min

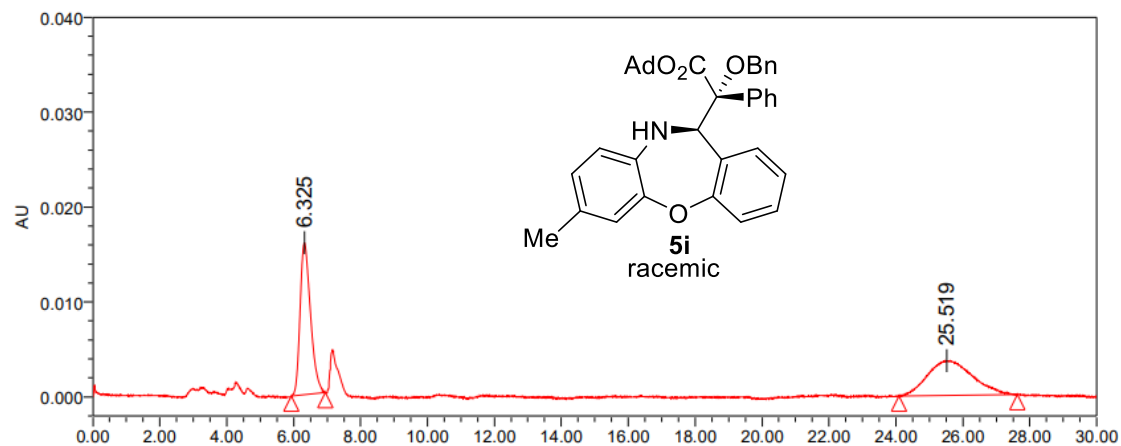

| Entry | RT min | Height mV | Area mV.sec | % Area % |
|-------|--------|-----------|-------------|----------|
| 1     | 6.325  | 16017     | 341845      | 49.92    |
| 2     | 25.519 | 3655      | 342944      | 50.02    |

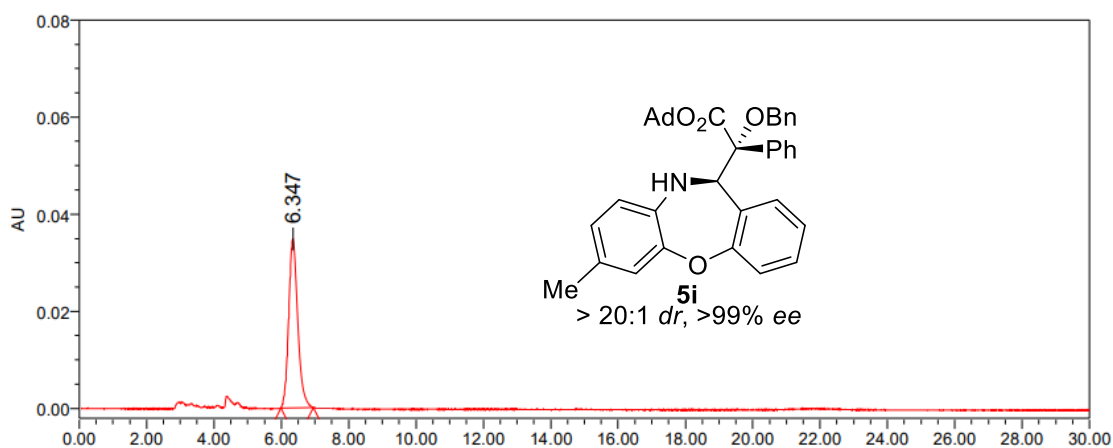

| Entry | RT min | Height mV | Area mV.sec | % Area % |
|-------|--------|-----------|-------------|----------|
| 1     | 6.347  | 34831     | 655381      | 100.00   |

Condition: Chrial AD-H,  $\lambda = 254$  nm, hexane/isopropanol = 98:2

flow rate = 1.0 mL/min

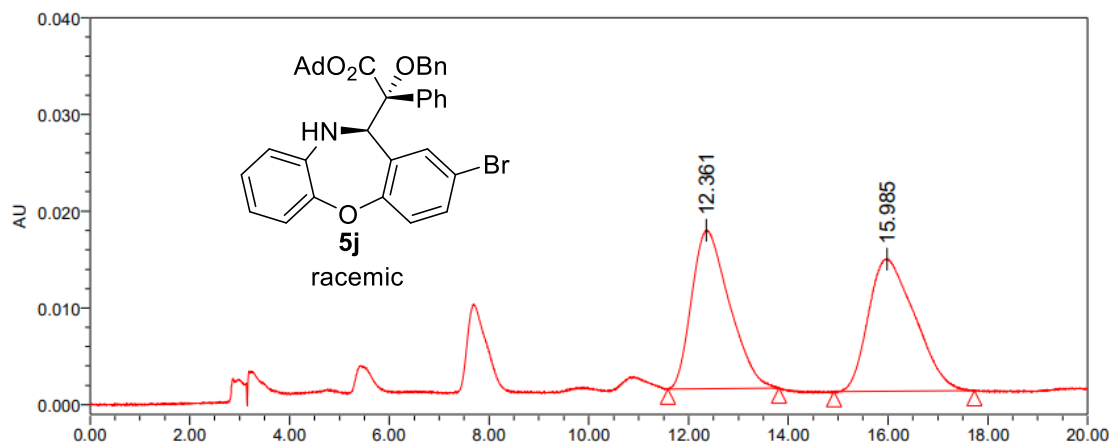

| Entry | RT min | Height mV | Area mV.sec | % Area % |
|-------|--------|-----------|-------------|----------|
| 1     | 12.361 | 16355     | 858408      | 49.25    |
| 2     | 15.985 | 13685     | 885756      | 50.75    |

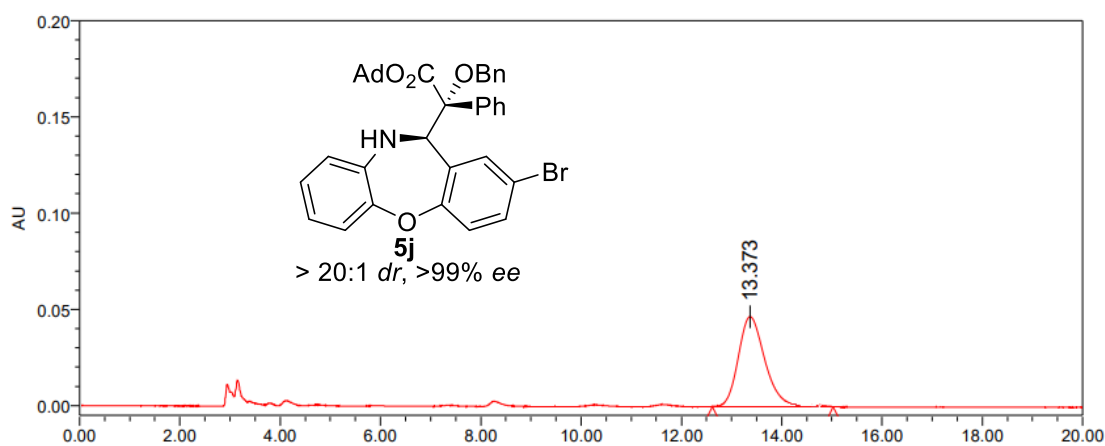

| Entry | RT min | Height mV | Area mV.sec | % Area % |
|-------|--------|-----------|-------------|----------|
| 1     | 13.373 | 46744     | 176153      | 100.00   |

Condition: Chrial AD-H,  $\lambda = 254$  nm, hexane/isopropanol = 90:10

flow rate = 1.0 mL/min

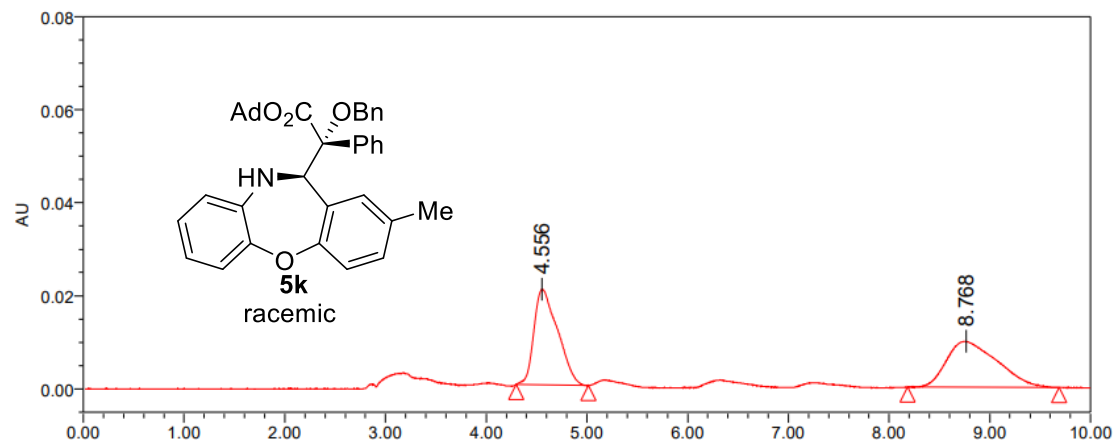

| Entry | RT min | Height mV | Area mV.sec | % Area % |
|-------|--------|-----------|-------------|----------|
| 1     | 4.556  | 20587     | 337314      | 49.47    |
| 2     | 8.768  | 9846      | 344572      | 50.53    |

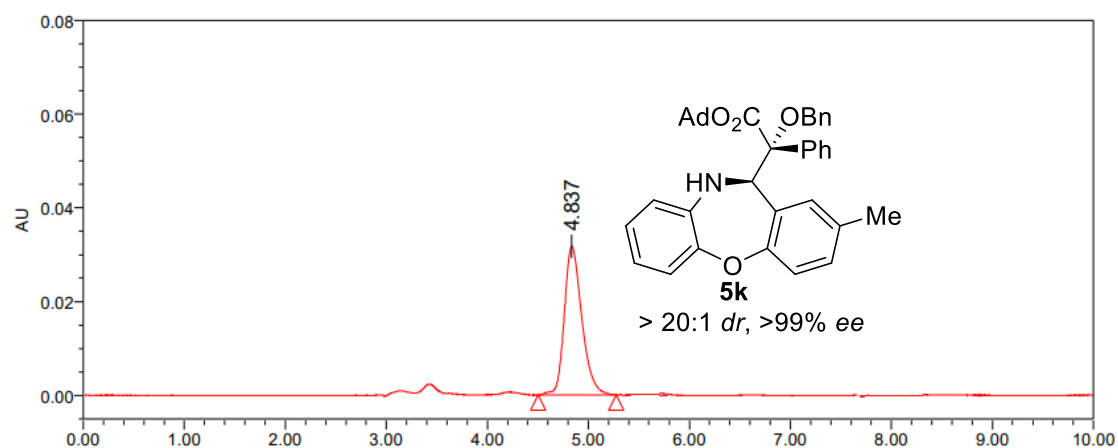

| Entry | RT min | Height mV | Area mV.sec | % Area % |
|-------|--------|-----------|-------------|----------|
| 1     | 4.837  | 31695     | 3822073     | 100.00   |

Condition: Chrial IA,  $\lambda = 254$  nm, hexane/isopropanol = 98:2

flow rate = 1.0 mL/min

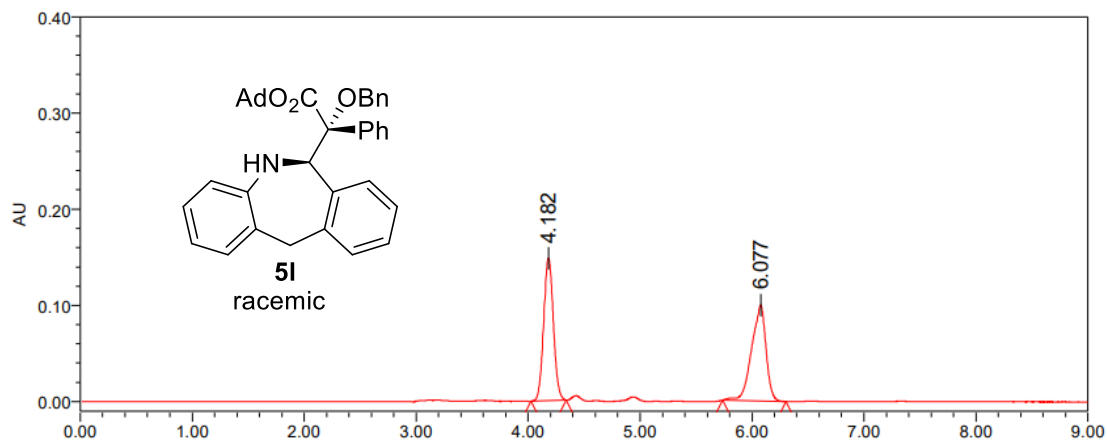

| Entry | RT min | Height mV | Area mV.sec | % Area % |
|-------|--------|-----------|-------------|----------|
| 1     | 4.182  | 148027    | 890600      | 50.02    |
| 2     | 6.077  | 99633     | 889714      | 49.98    |

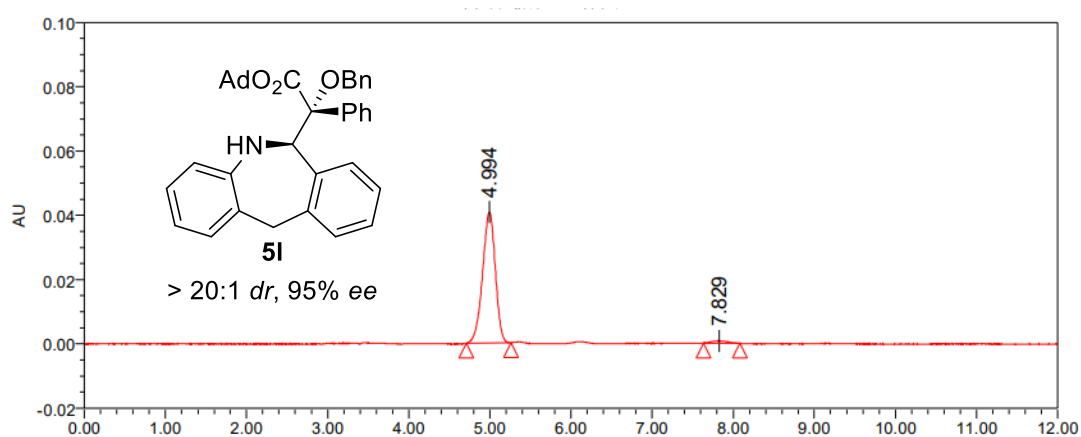

| Entry | RT min | Height mV | Area mV.sec | % Area % |
|-------|--------|-----------|-------------|----------|
| 1     | 4.994  | 40692     | 447766      | 97.87    |
| 2     | 7.829  | 703       | 9738        | 2.13     |

Condition: Chrial IA,  $\lambda = 304$  nm, hexane/isopropanol = 98:2

flow rate = 1.0 mL/min

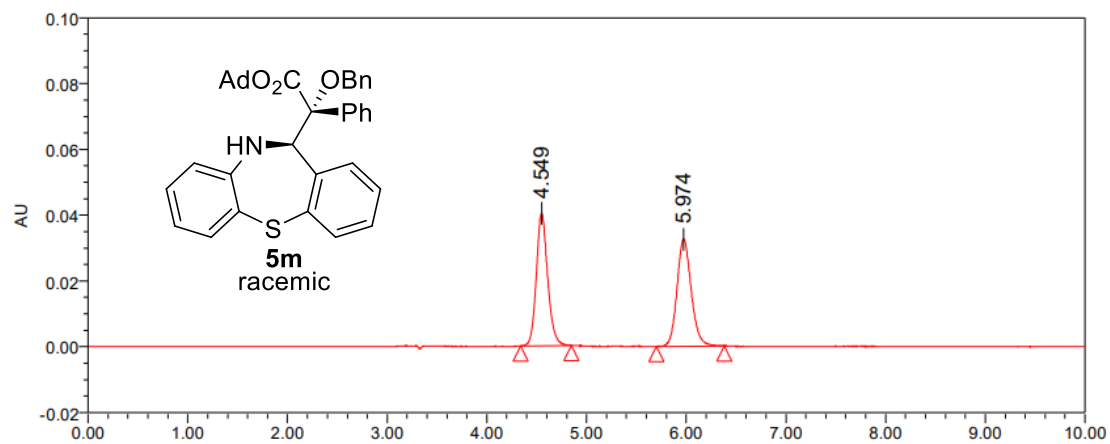

| Entry | RT min | Height mV | Area mV.sec | % Area % |
|-------|--------|-----------|-------------|----------|
| 1     | 4.549  | 40188     | 318285      | 49.64    |
| 2     | 5.974  | 32518     | 322916      | 50.36    |

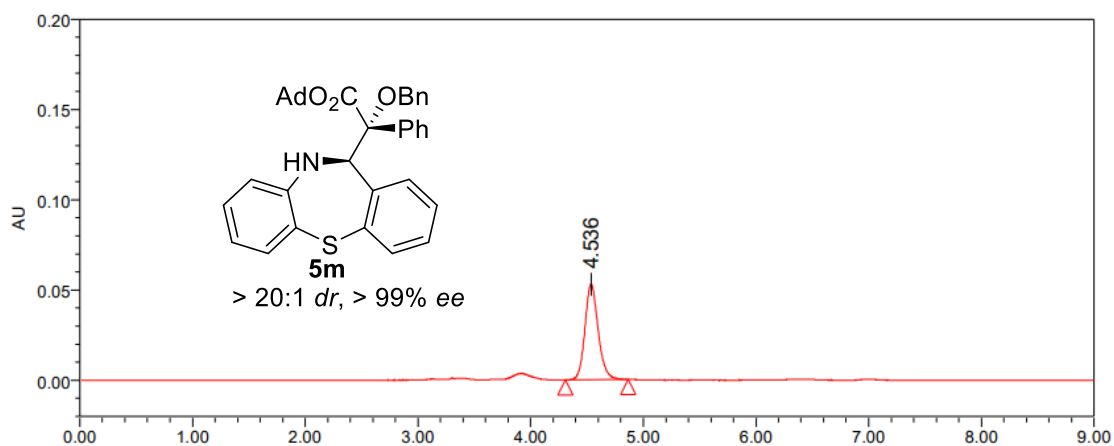

| Entry | RT min | Height mV | Area mV.sec | % Area % |
|-------|--------|-----------|-------------|----------|
| 1     | 4.536  | 52971     | 433363      | 100.00   |

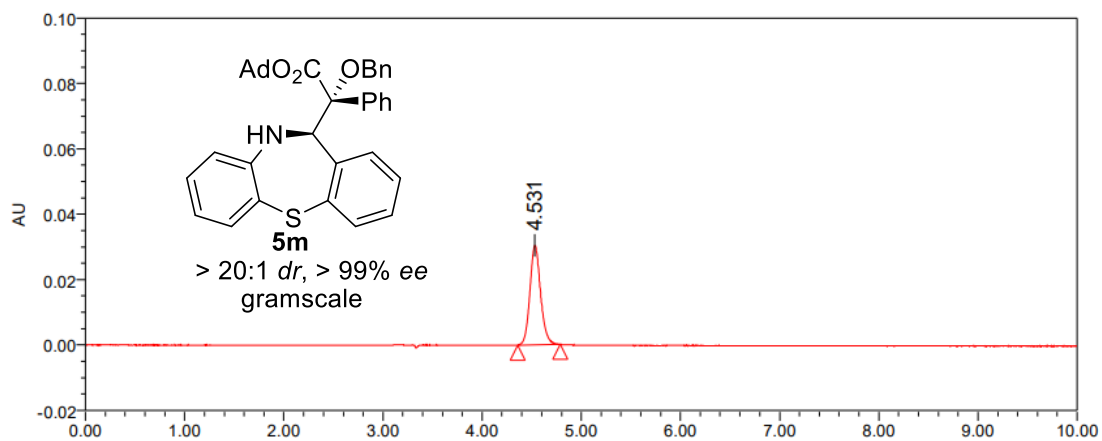

| Entry | RT min | Height mV | Area mV.sec | % Area % |
|-------|--------|-----------|-------------|----------|
| 1     | 4.531  | 30423     | 227628      | 100.00   |

Condition: Chrial IA,  $\lambda = 312$  nm, hexane/isopropanol = 95:5

flow rate = 1.0 mL/min

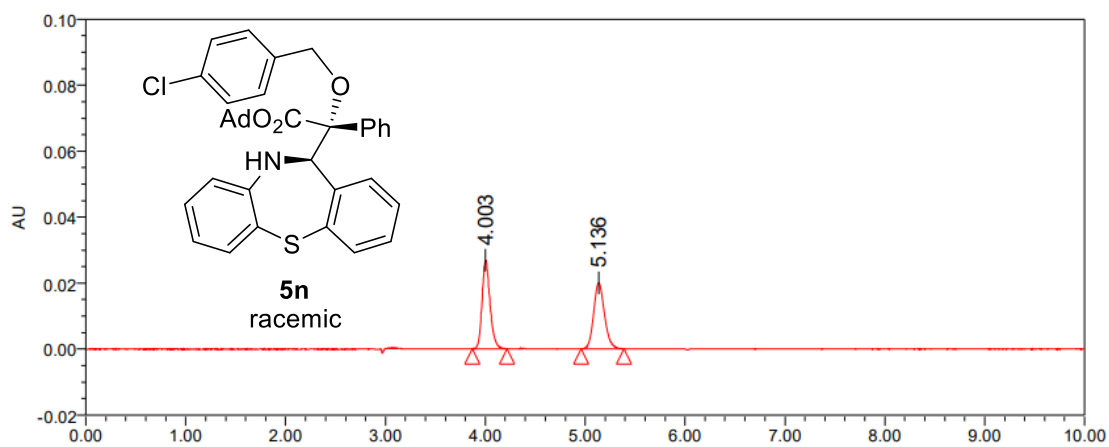

| Entry | RT min | Height mV | Area mV.sec | % Area % |
|-------|--------|-----------|-------------|----------|
| 1     | 4.003  | 26874     | 149490      | 50.07    |
| 2     | 5.136  | 20027     | 149061      | 49.93    |

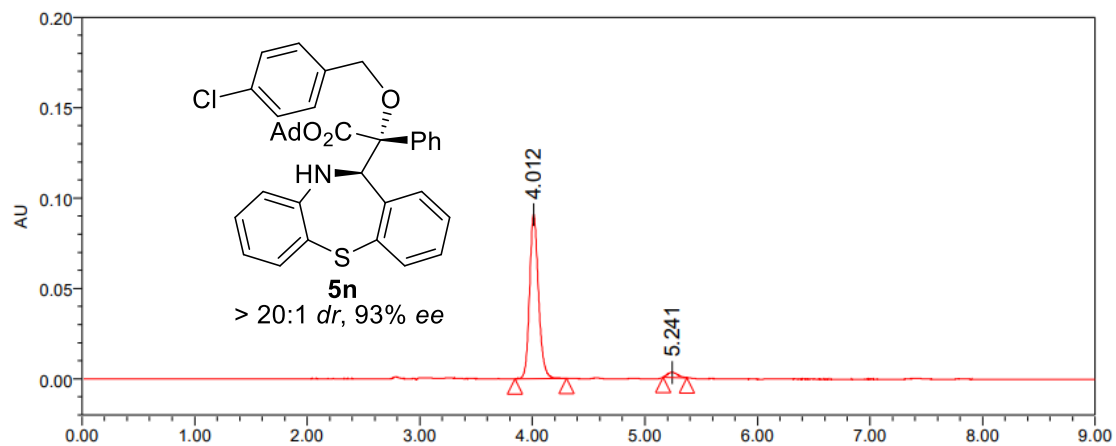

| Entry | RT min | Height mV | Area mV.sec | % Area % |
|-------|--------|-----------|-------------|----------|
| 1     | 4.012  | 90778     | 501477      | 96.71    |
| 2     | 5.241  | 2816      | 17071       | 3.29     |

Condition: Chrial IA,  $\lambda = 254$  nm, hexane/isopropanol = 95:5

flow rate = 1.0 mL/min

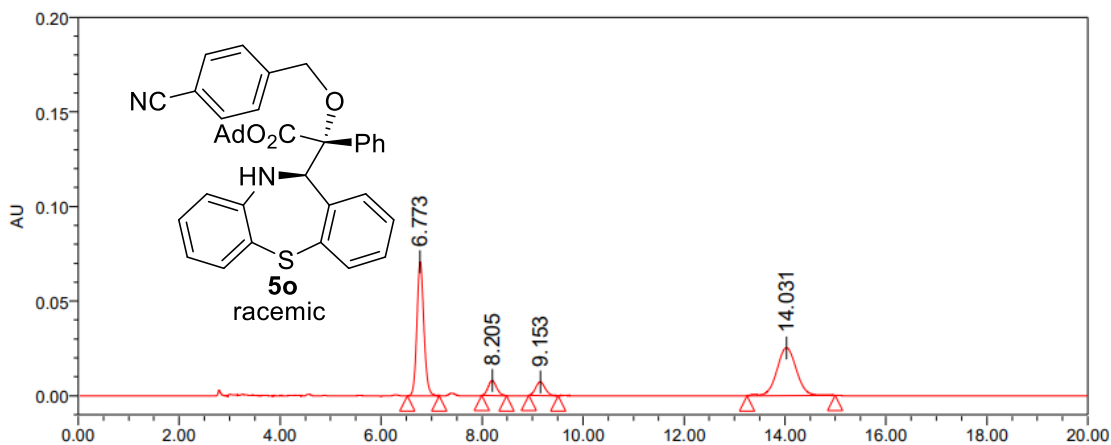

| Entry | RT min | Height mV | Area mV.sec | % Area % |
|-------|--------|-----------|-------------|----------|
| 1     | 6.773  | 70841     | 676515      | 44.07    |
| 2     | 8.205  | 7894      | 92769       | 6.04     |
| 3     | 9.153  | 7201      | 92912       | 6.05     |
| 4     | 14.031 | 25284     | 672909      | 43.83    |



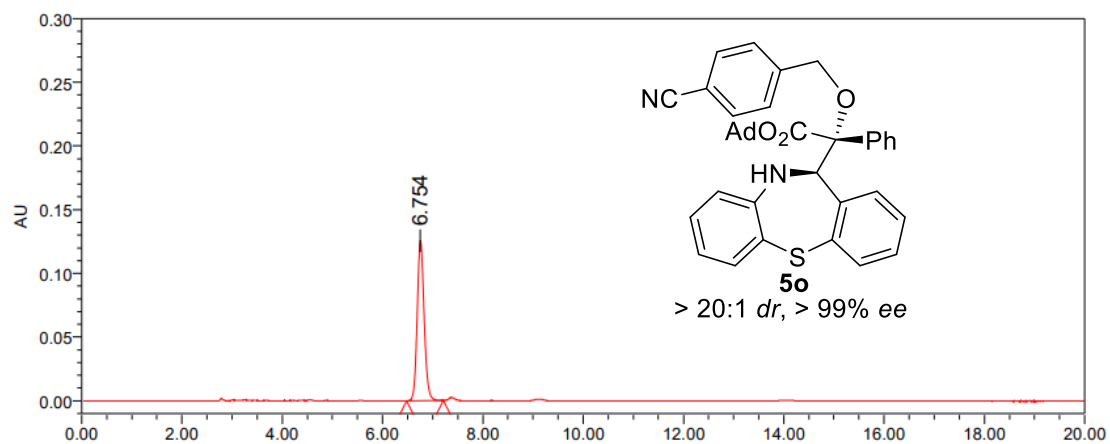

| Entry | RT min | Height mV | Area mV.sec | % Area % |
|-------|--------|-----------|-------------|----------|
| 1     | 6.754  | 125541    | 1200946     | 100.00   |

Condition: Chrial IA,  $\lambda = 254$  nm, hexane/isopropanol = 95:5

flow rate = 1.0 mL/min

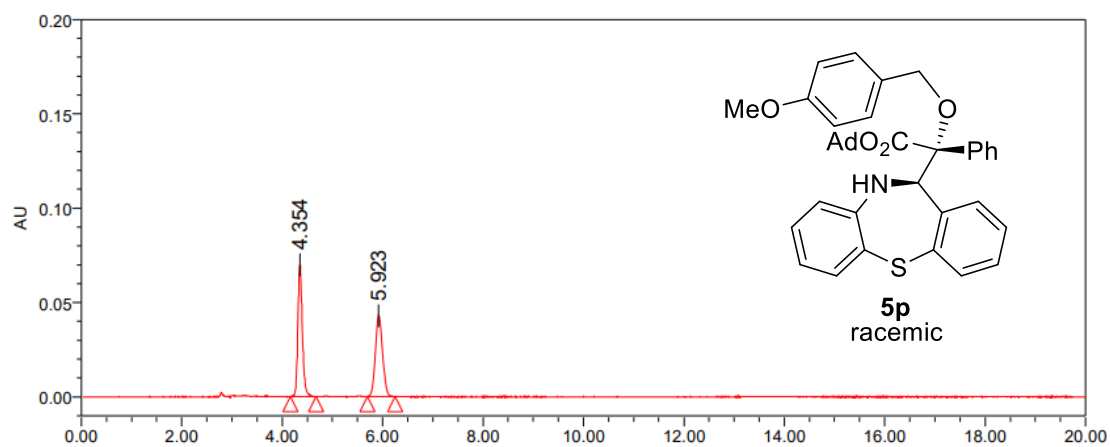

| Entry | RT min | Height mV | Area mV.sec | % Area % |
|-------|--------|-----------|-------------|----------|
| 1     | 4.354  | 69924     | 433980      | 50.51    |
| 2     | 5.923  | 42773     | 425145      | 49.49    |

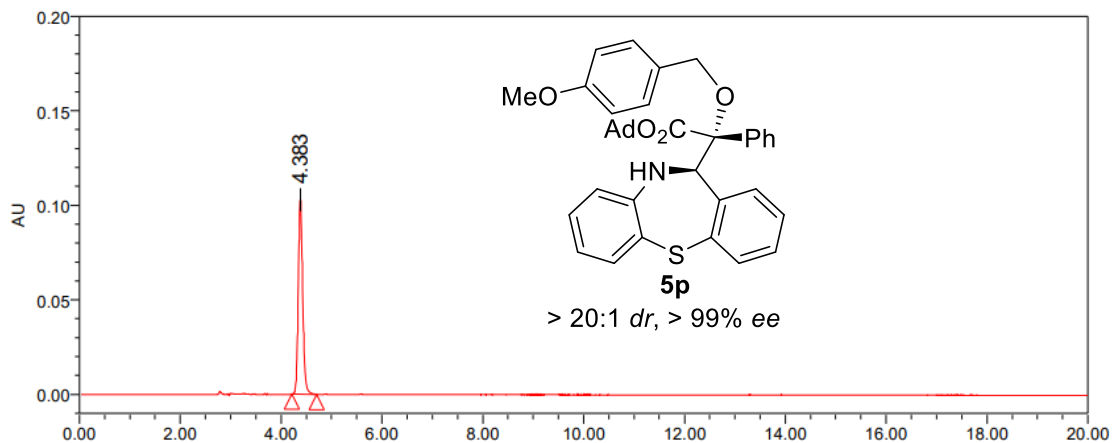

| Entry | RT min | Height mV | Area mV.sec | % Area % |
|-------|--------|-----------|-------------|----------|
| 1     | 4.383  | 103052    | 628456      | 100.00   |

Condition: Chrial IA,  $\lambda = 310$  nm, hexane/isopropanol = 98:2

flow rate = 0.3 mL/min

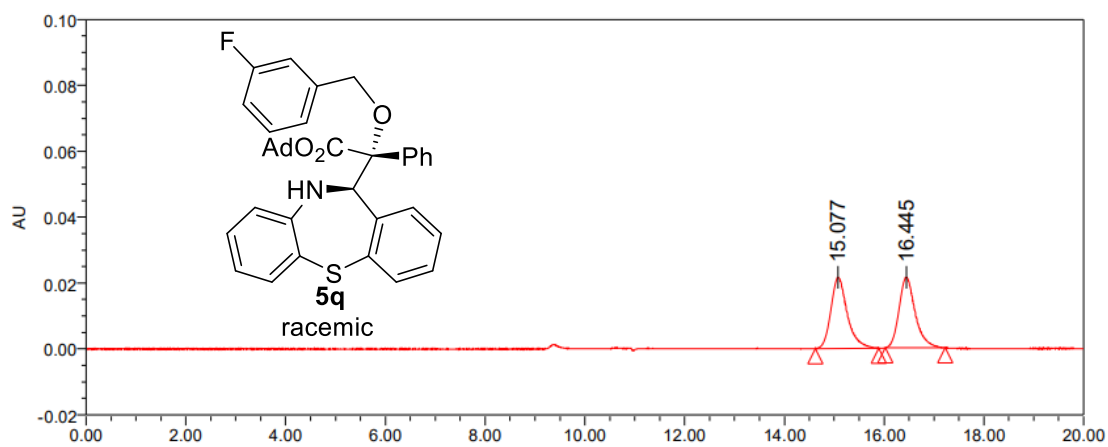

| Entry | RT min | Height mV | Area mV.sec | % Area % |
|-------|--------|-----------|-------------|----------|
| 1     | 15.077 | 21569     | 493208      | 50.37    |
| 2     | 16.445 | 21414     | 485947      | 49.63    |

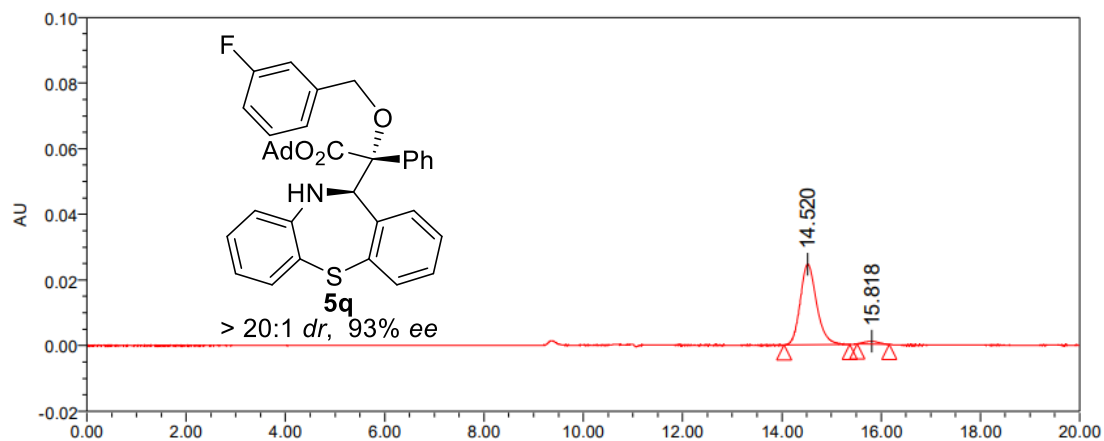

| Entry | RT min | Height mV | Area mV.sec | % Area % |
|-------|--------|-----------|-------------|----------|
| 1     | 14.520 | 24543     | 558035      | 96.89    |
| 2     | 15.818 | 862       | 17923       | 3.11     |

Condition: Chrial IA,  $\lambda = 330$  nm, hexane/isopropanol = 95:5

flow rate = 0.3 mL/min

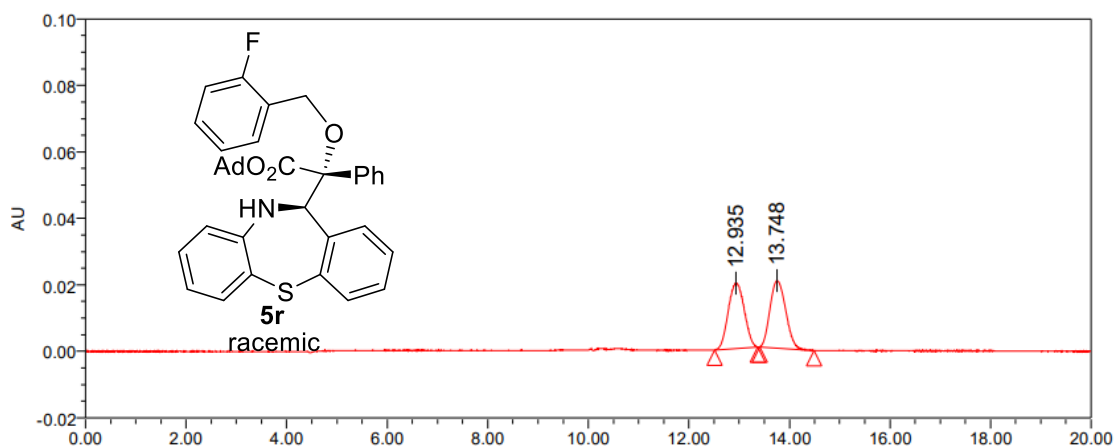

| Entry | RT min | Height mV | Area mV.sec | % Area % |
|-------|--------|-----------|-------------|----------|
| 1     | 12.935 | 19672     | 440518      | 50.19    |
| 2     | 13.748 | 20274     | 437143      | 49.81    |

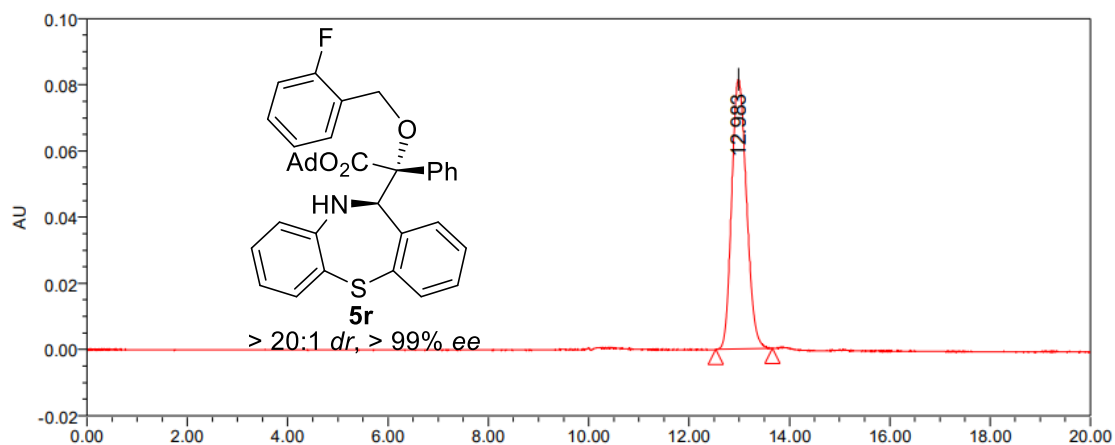

| Entry | RT min | Height mV | Area mV.sec | % Area % |
|-------|--------|-----------|-------------|----------|
| 1     | 12.983 | 81519     | 1694884     | 100.00   |

Condition: Chrial IF-3,  $\lambda = 254$  nm, hexane/isopropanol = 98:2

flow rate = 1.0 mL/min

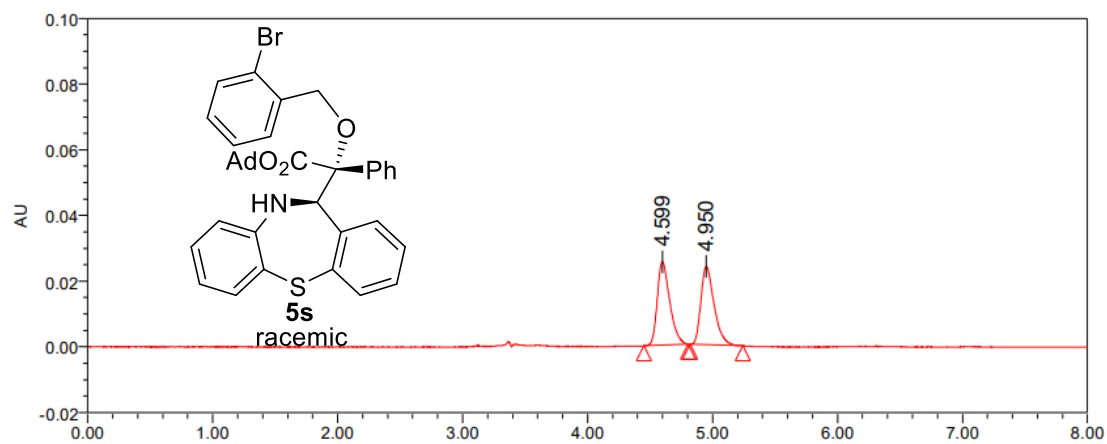

| Entry | RT min | Height mV | Area mV.sec | % Area % |
|-------|--------|-----------|-------------|----------|
| 1     | 4.599  | 25395     | 175768      | 49.92    |
| 2     | 4.950  | 23894     | 176339      | 50.08    |

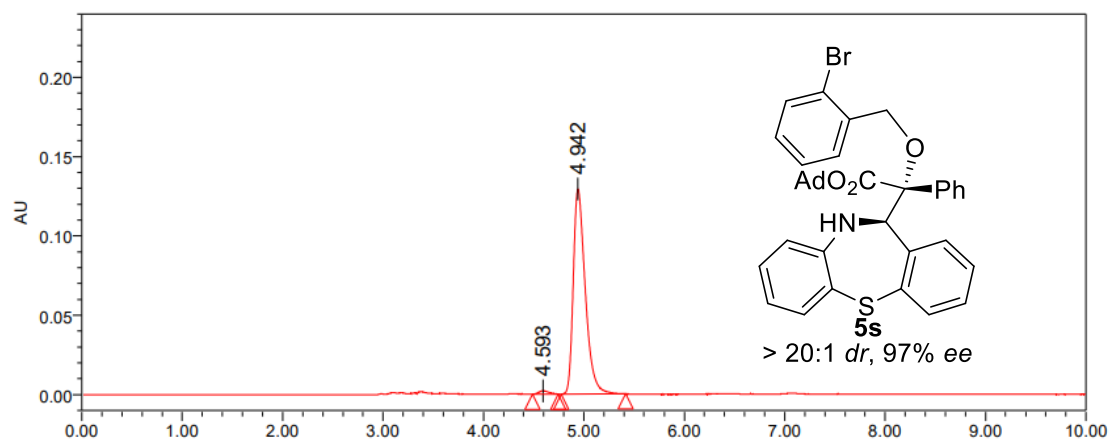

| Entry | RT min | Height mV | Area mV.sec | % Area % |
|-------|--------|-----------|-------------|----------|
| 1     | 4.593  | 2097      | 14457       | 1.33     |
| 2     | 4.942  | 129259    | 1070316     | 98.63    |

Condition: Chrial IA,  $\lambda = 254$  nm, hexane/isopropanol = 95:5

flow rate = 1.0 mL/min

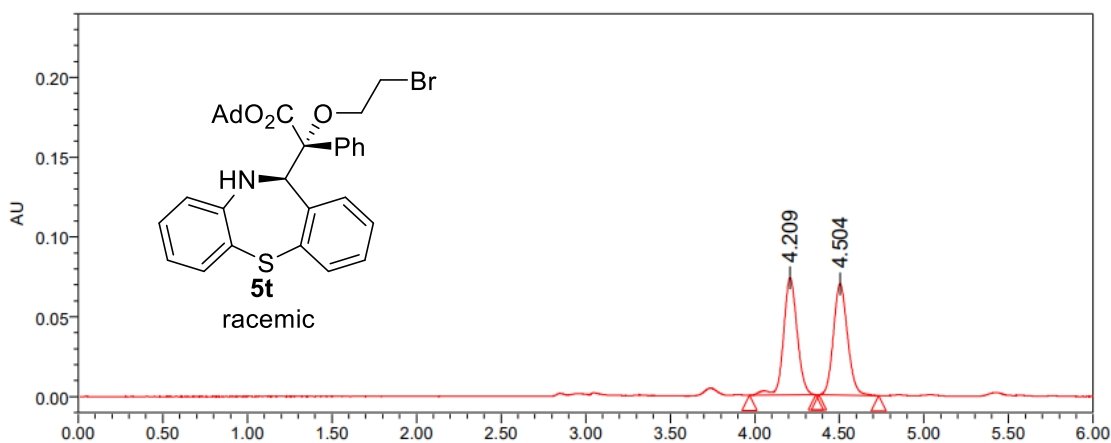

| Entry | RT min | Height mV | Area mV.sec | % Area % |
|-------|--------|-----------|-------------|----------|
| 1     | 4.209  | 73638     | 414935      | 50.51    |
| 2     | 4.504  | 69780     | 406534      | 49.49    |

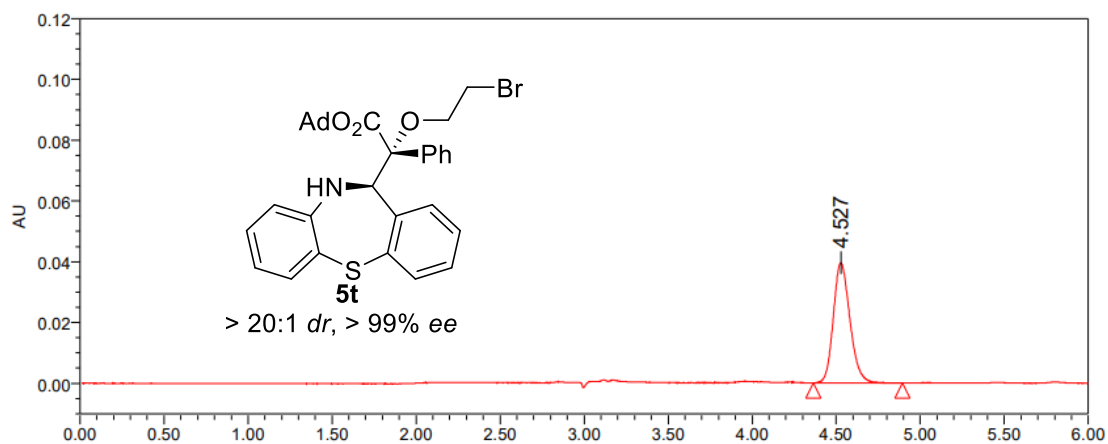

| Entry | RT min | Height mV | Area mV.sec | % Area % |
|-------|--------|-----------|-------------|----------|
| 1     | 4.527  | 39474     | 270401      | 100.00   |

Condition: Chrial IF-3,  $\lambda = 254$  nm, hexane/isopropanol = 95:5

flow rate = 1.0 mL/min

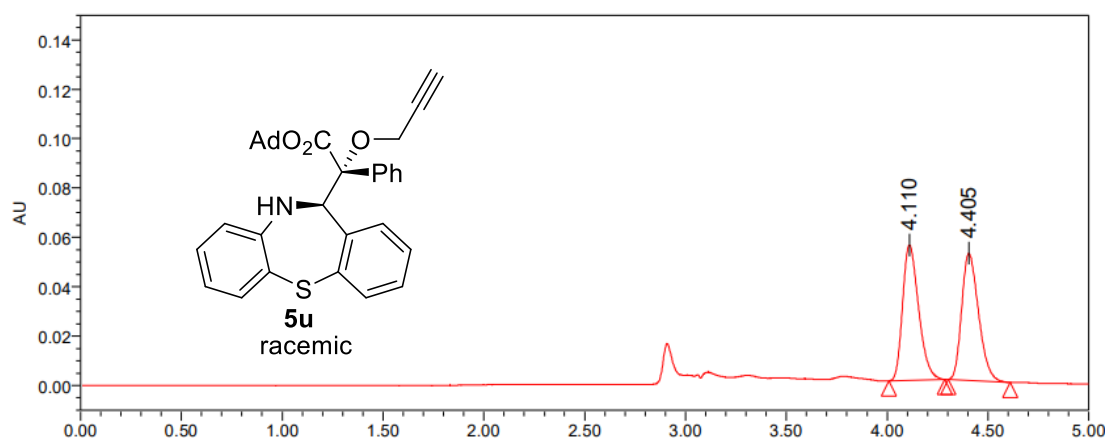

| Entry | RT min | Height mV | Area mV.sec | % Area % |
|-------|--------|-----------|-------------|----------|
| 1     | 4.110  | 54941     | 303847      | 50.36    |
| 2     | 4.405  | 51501     | 299562      | 49.64    |

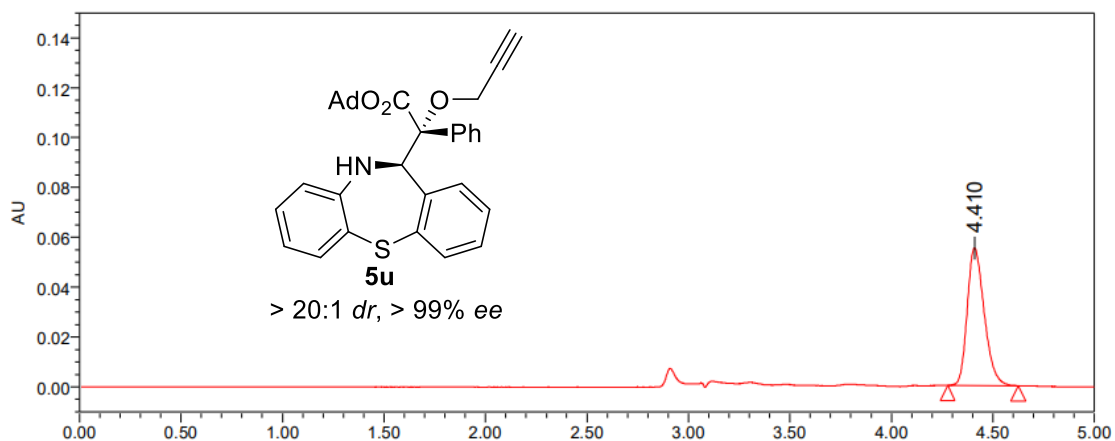

| Entry | RT min | Height mV | Area mV.sec | % Area % |
|-------|--------|-----------|-------------|----------|
| 1     | 4.410  | 55230     | 321535      | 100.00   |

Condition: Chrial IF-3,  $\lambda = 254$  nm, hexane/isopropanol = 98:2

flow rate = 1.0 mL/min

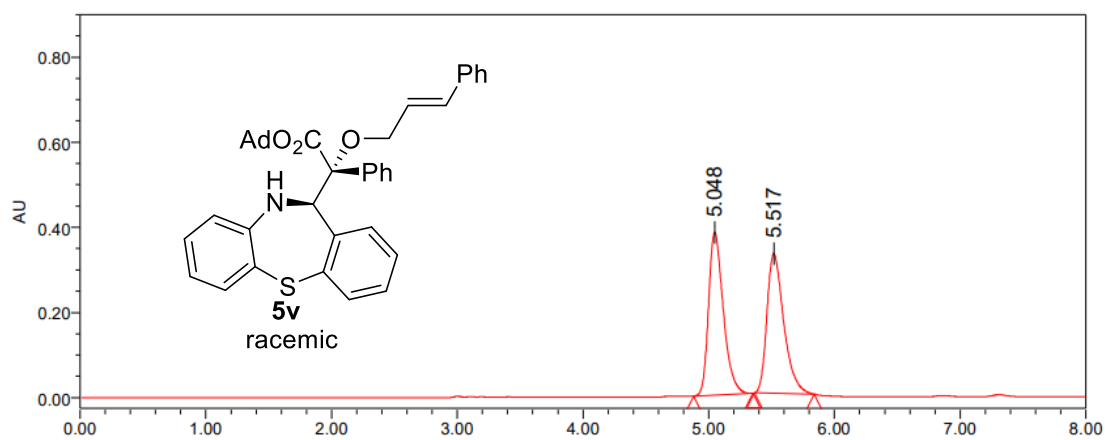

| Entry | RT min | Height mV | Area mV.sec | % Area % |
|-------|--------|-----------|-------------|----------|
| 1     | 5.048  | 382340    | 3120386     | 50.53    |
| 2     | 5.517  | 328359    | 3054796     | 49.47    |

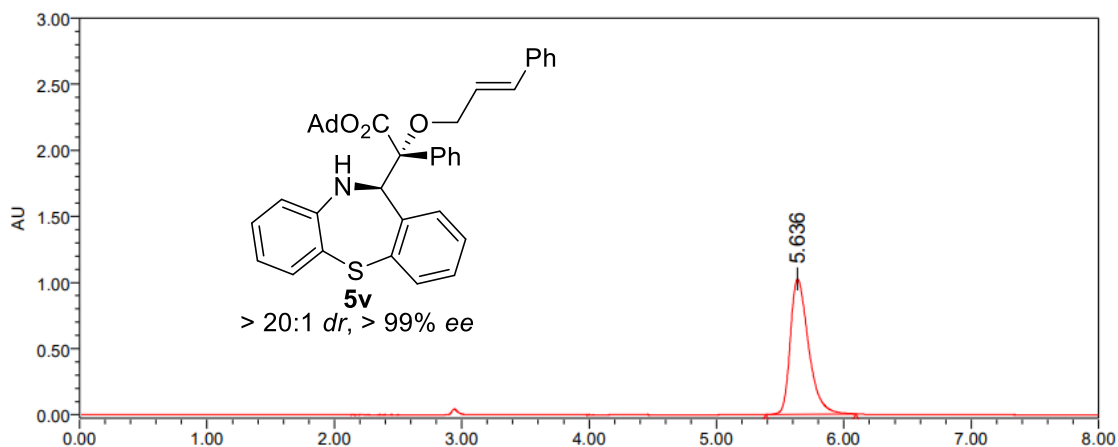

| Entry | RT min | Height mV | Area mV.sec | % Area % |
|-------|--------|-----------|-------------|----------|
| 1     | 5.636  | 1023637   | 10164931    | 100.00   |

Condition: Chrial AD-H,  $\lambda = 254$  nm, hexane/isopropanol = 90:10

flow rate = 1.0 mL/min

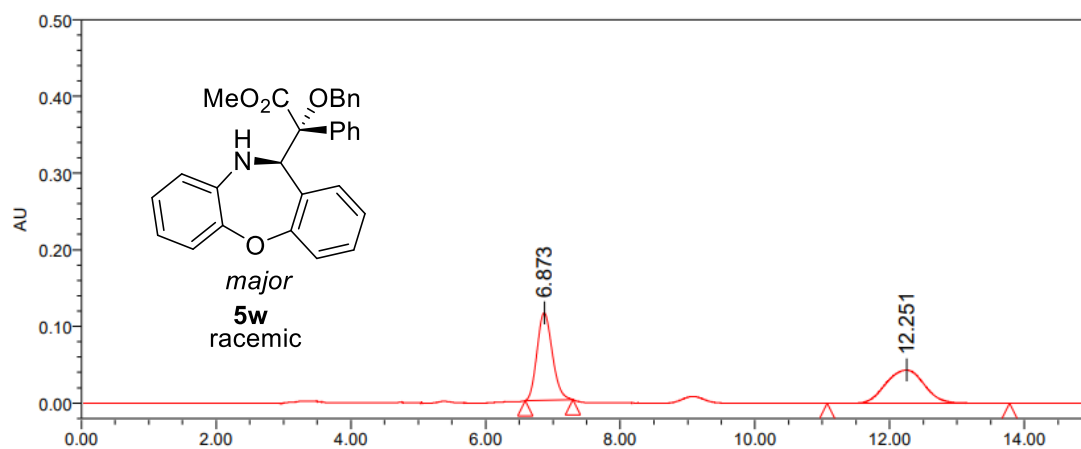

| Entry | RT min | Height mV | Area mV.sec | % Area % |
|-------|--------|-----------|-------------|----------|
| 1     | 6.873  | 113866    | 1795557     | 50.78    |
| 2     | 12.251 | 43517     | 1740674     | 49.22    |



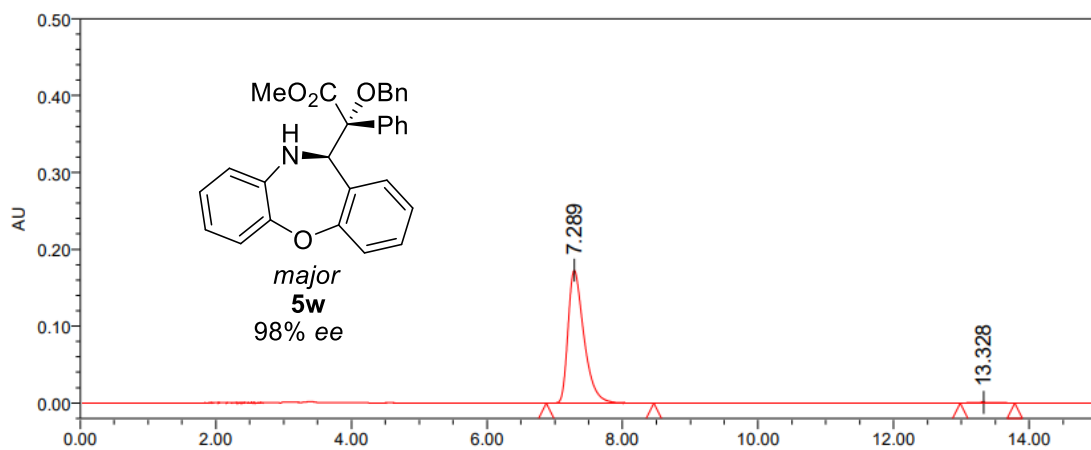

| Entry | RT min | Height mV | Area mV.sec | % Area % |
|-------|--------|-----------|-------------|----------|
| 1     | 7.289  | 172730    | 2809339     | 99.15    |
| 2     | 13.328 | 1021      | 23996       | 0.85     |

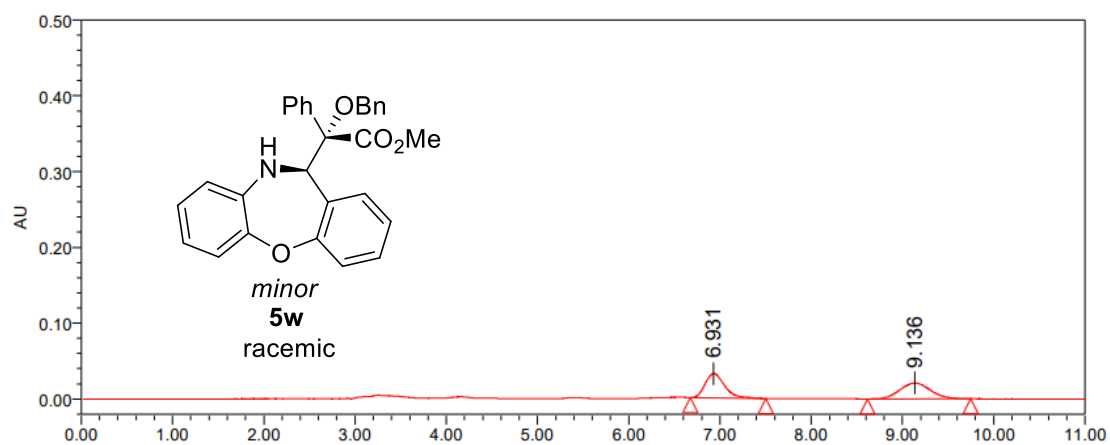

| Entry | RT min | Height mV | Area mV.sec | % Area % |
|-------|--------|-----------|-------------|----------|
| 1     | 6.931  | 32229     | 484381      | 49.51    |
| 2     | 9.136  | 21011     | 493921      | 50.29    |

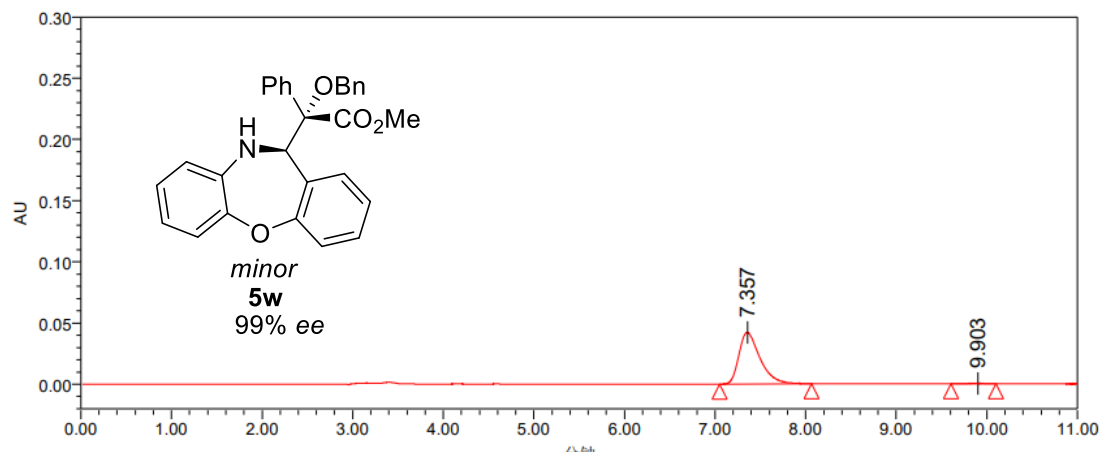

| Entry | RT min | Height mV | Area mV.sec | % Area % |
|-------|--------|-----------|-------------|----------|
| 1     | 7.357  | 42158     | 675354      | 99.53    |
| 2     | 9.903  | 209       | 3192        | 0.47     |

Condition: Chrial AD-H,  $\lambda = 254$  nm, hexane/isopropanol = 80:20

flow rate = 1.0 mL/min

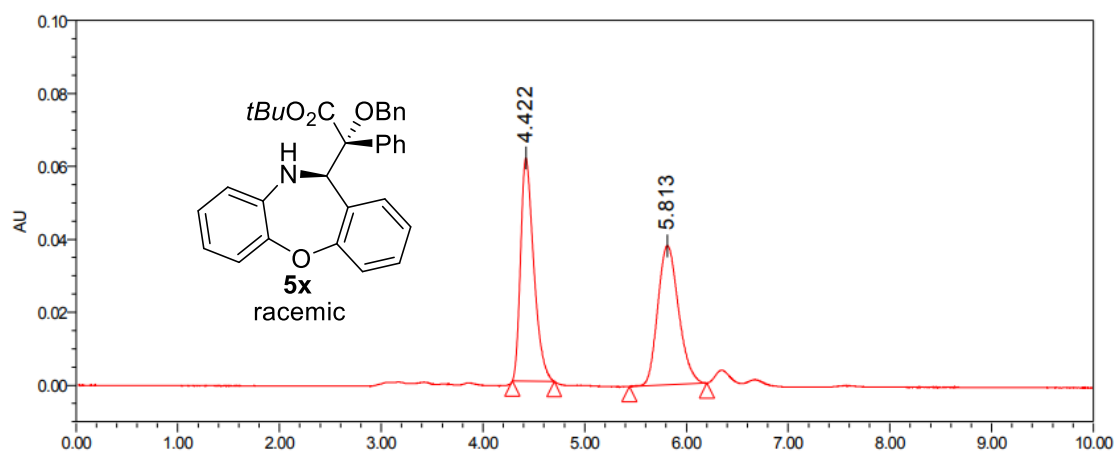

| Entry | RT min | Height mV | Area mV.sec | % Area % |
|-------|--------|-----------|-------------|----------|
| 1     | 4.422  | 61156     | 551901      | 50.42    |
| 2     | 5.813  | 38114     | 542765      | 49.58    |

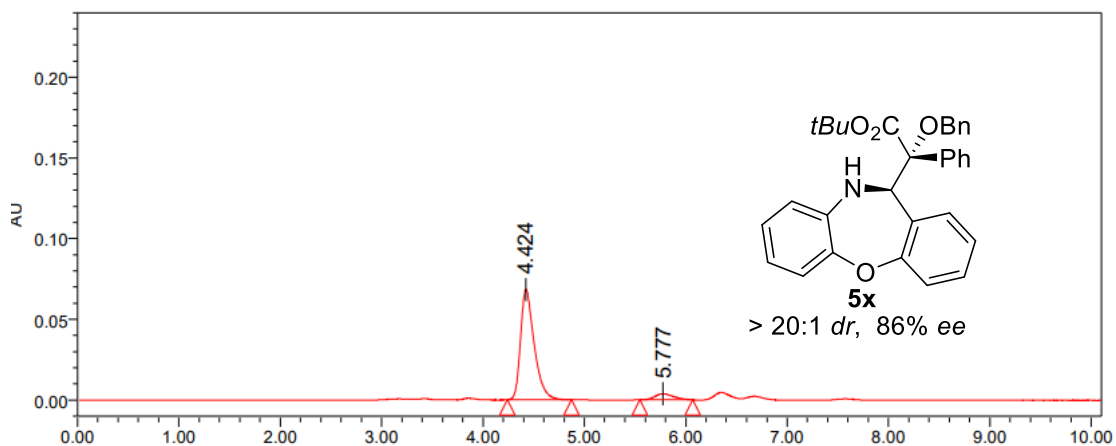

| Entry | RT min | Height mV | Area mV.sec | % Area % |
|-------|--------|-----------|-------------|----------|
| 1     | 4.424  | 68374     | 638433      | 93.21    |
| 2     | 5.777  | 3712      | 46522       | 6.79     |

Condition: Chrial IC,  $\lambda = 254$  nm, hexane/isopropanol = 70:30

flow rate = 1.0 mL/min

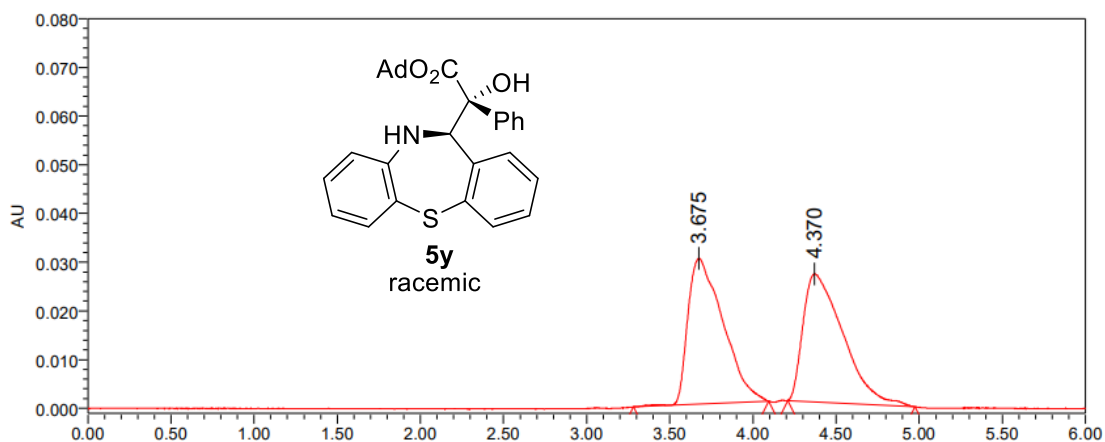

| Entry | RT min | Height mV | Area mV.sec | % Area % |
|-------|--------|-----------|-------------|----------|
| 1     | 3.675  | 439443    | 29886       | 50.0     |
| 2     | 4.370  | 439484    | 26281       | 50.0     |

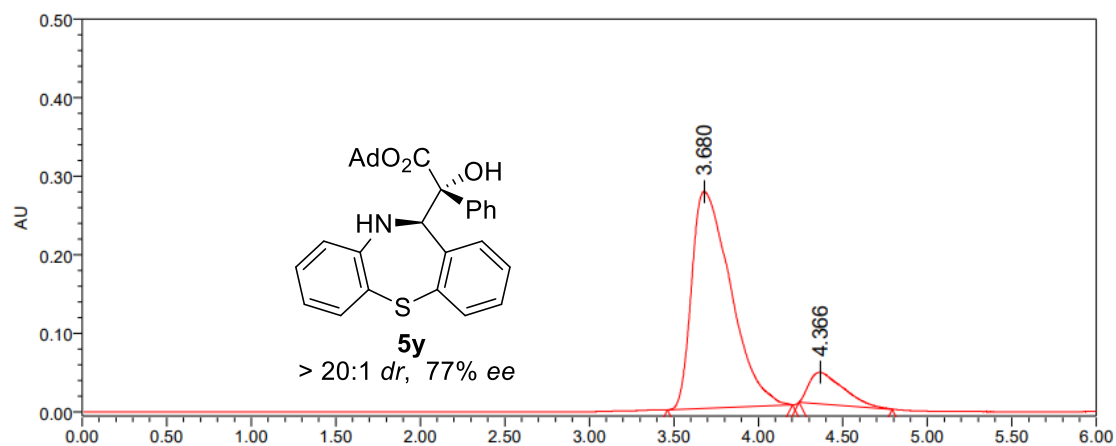

| Entry | RT min | Height mV | Area mV.sec | % Area % |
|-------|--------|-----------|-------------|----------|
| 1     | 3.680  | 4438610   | 275798      | 88.78    |
| 2     | 4.366  | 560750    | 39858       | 11.22    |

Condition: Chrial IA,  $\lambda = 300$  nm, hexane/isopropanol = 98:2

flow rate = 1.0 mL/min

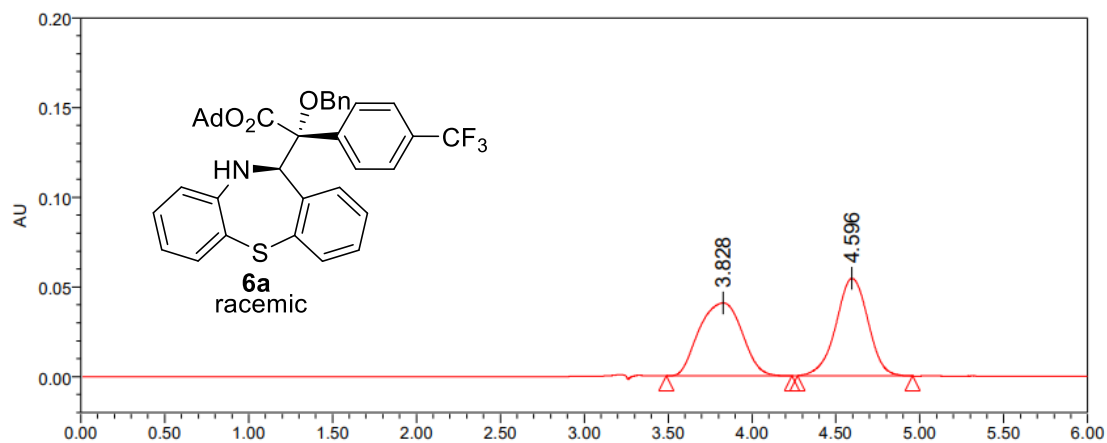

| Entry | RT min | Height mV | Area mV.sec | % Area % |
|-------|--------|-----------|-------------|----------|
| 1     | 3.838  | 40746     | 725294      | 50.19    |
| 2     | 4.596  | 54281     | 719924      | 49.81    |

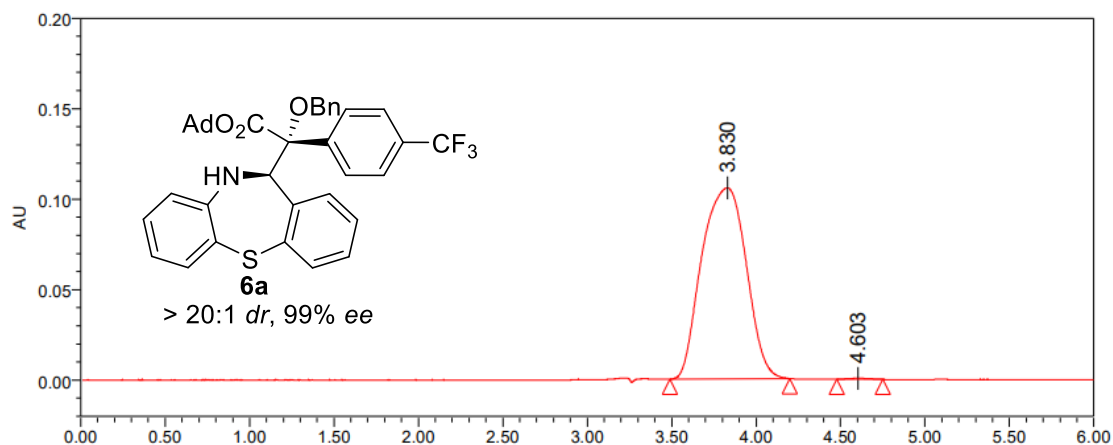

| Entry | RT min | Height mV | Area mV.sec | % Area % |
|-------|--------|-----------|-------------|----------|
| 1     | 3.830  | 105622    | 1941465     | 99.74    |
| 2     | 4.603  | 548       | 5069        | 0.26     |

Condition: Chrial IA,  $\lambda = 330$  nm, hexane/isopropanol = 95:5

flow rate = 1.0 mL/min

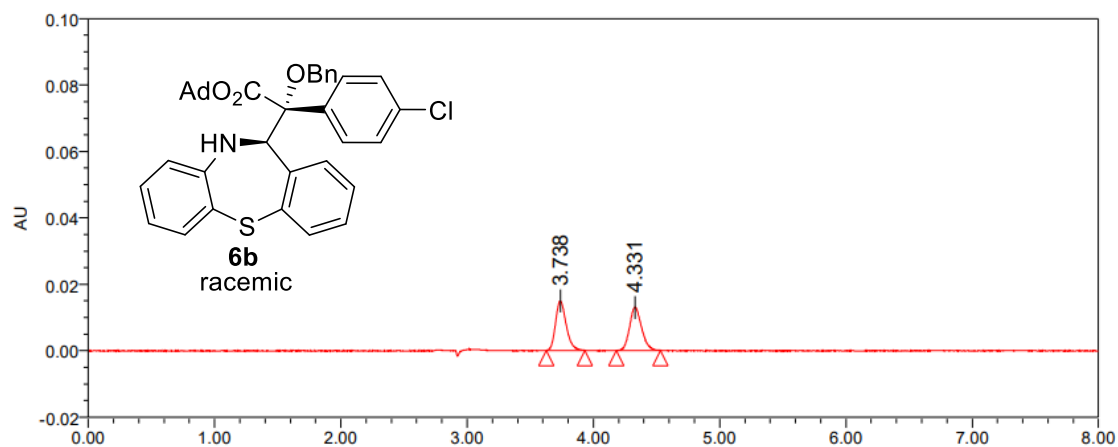

| Entry | RT min | Height mV | Area mV.sec | % Area % |
|-------|--------|-----------|-------------|----------|
| 1     | 3.738  | 14900     | 86896       | 50.04    |
| 2     | 4.331  | 13028     | 86746       | 49.96    |

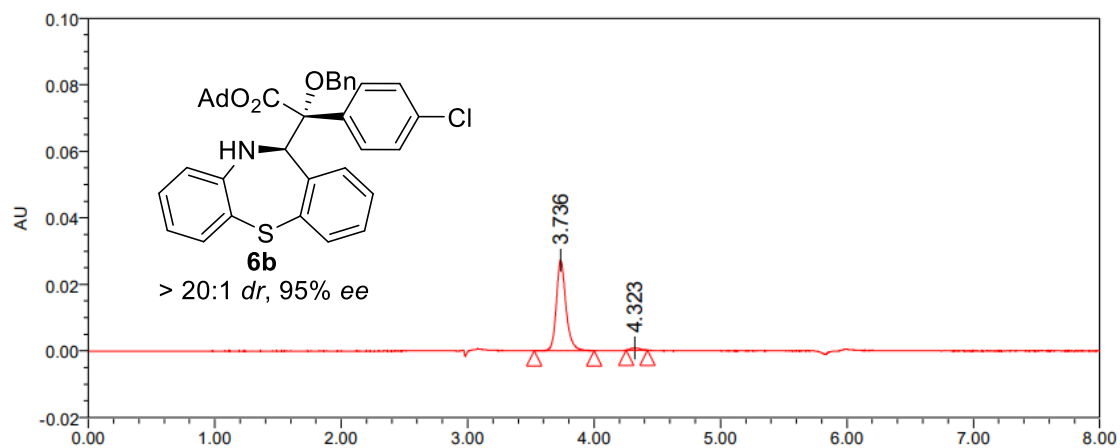

| Entry | RT min | Height mV | Area mV.sec | % Area % |
|-------|--------|-----------|-------------|----------|
| 1     | 3.736  | 27211     | 143026      | 97.79    |
| 2     | 4.323  | 654       | 3231        | 2.21     |

Condition: Chrial IA,  $\lambda = 300$  nm, hexane/isopropanol = 95:5

flow rate = 1.0 mL/min

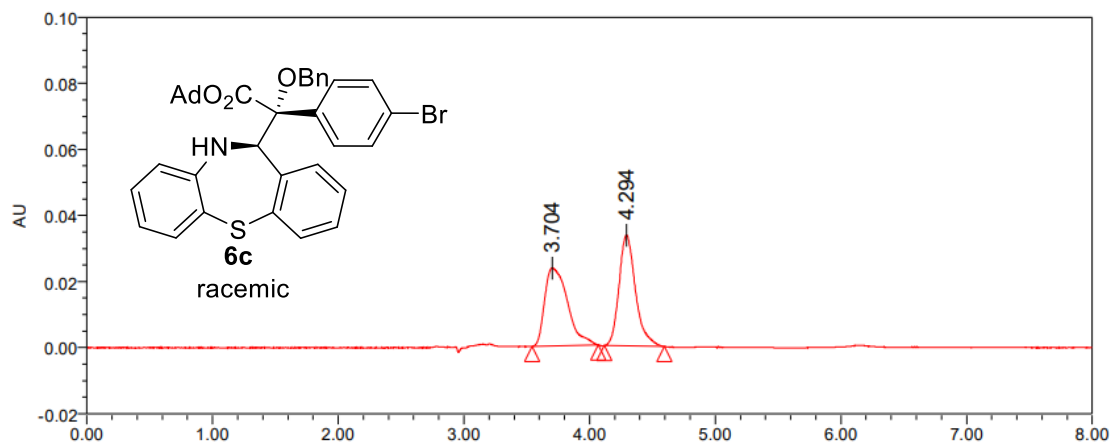

| Entry | RT min | Height mV | Area mV.sec | % Area % |
|-------|--------|-----------|-------------|----------|
| 1     | 3.704  | 23594     | 299335      | 49.40    |
| 2     | 4,294  | 33557     | 306545      | 50.60    |

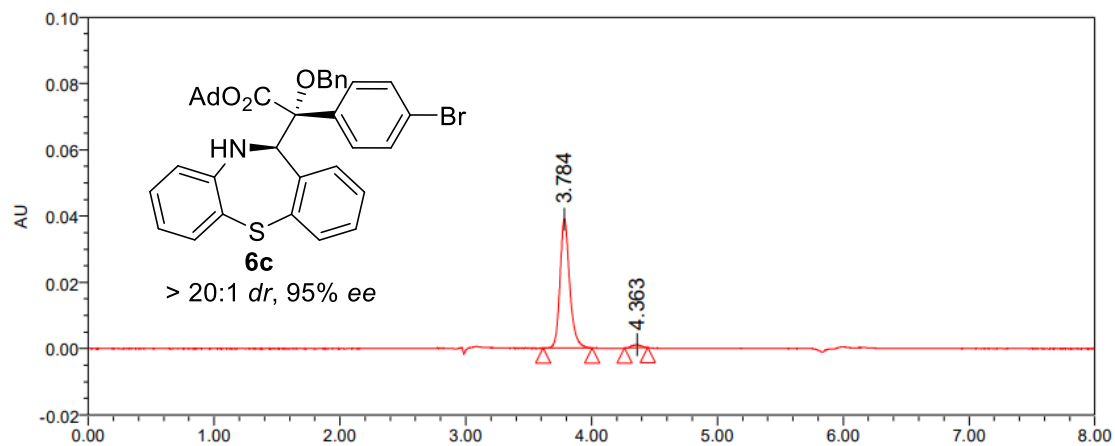

| Entry | RT min | Height mV | Area mV.sec | % Area % |
|-------|--------|-----------|-------------|----------|
| 1     | 3.784  | 38969     | 207591      | 97.61    |
| 2     | 4.363  | 940       | 5073        | 2.39     |

Condition: Chrial IA,  $\lambda = 310$  nm, hexane/isopropanol = 95:5

flow rate = 1.0 mL/min

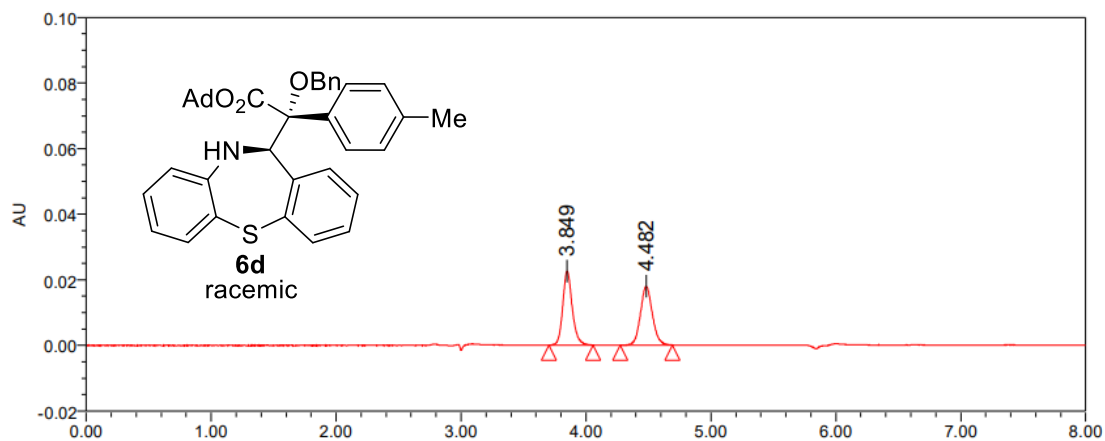

| Entry | RT min | Height mV | Area mV.sec | % Area % |
|-------|--------|-----------|-------------|----------|
| 1     | 3.849  | 22529     | 118945      | 49.93    |
| 2     | 4.482  | 17927     | 119279      | 50.07    |

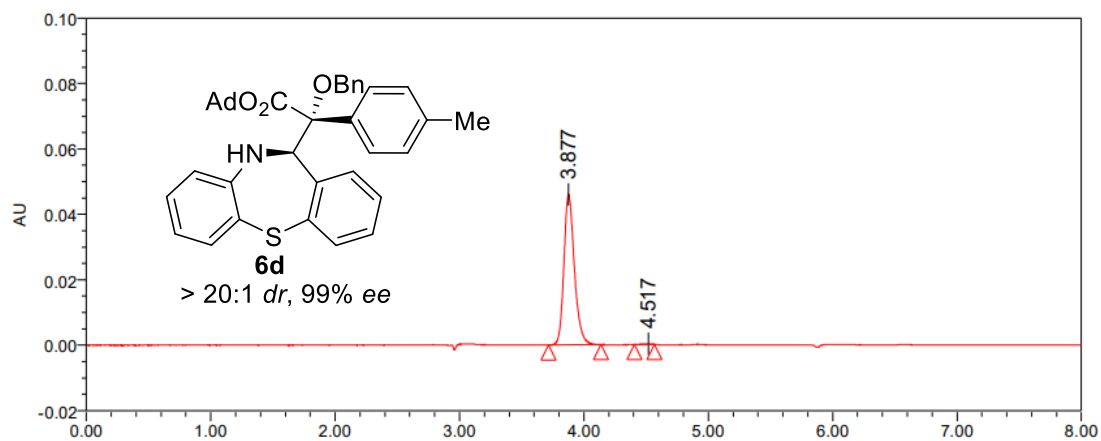

| Entry | RT min | Height mV | Area mV.sec | % Area % |
|-------|--------|-----------|-------------|----------|
| 1     | 3.877  | 46051     | 269187      | 99.58    |
| 2     | 4.517  | 234       | 1143        | 0.42     |

Condition: Chrial IA,  $\lambda = 330$  nm, hexane/isopropanol = 95:5

flow rate = 1.0 mL/min

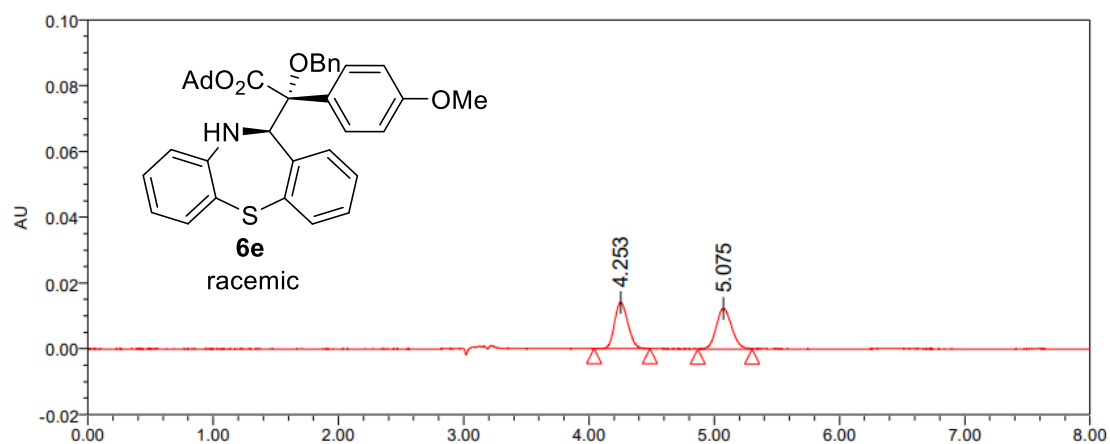

| Entry | RT min | Height mV | Area mV.sec | % Area % |
|-------|--------|-----------|-------------|----------|
| 1     | 4.253  | 14016     | 103555      | 49.85    |
| 2     | 5.075  | 12266     | 104198      | 50.15    |



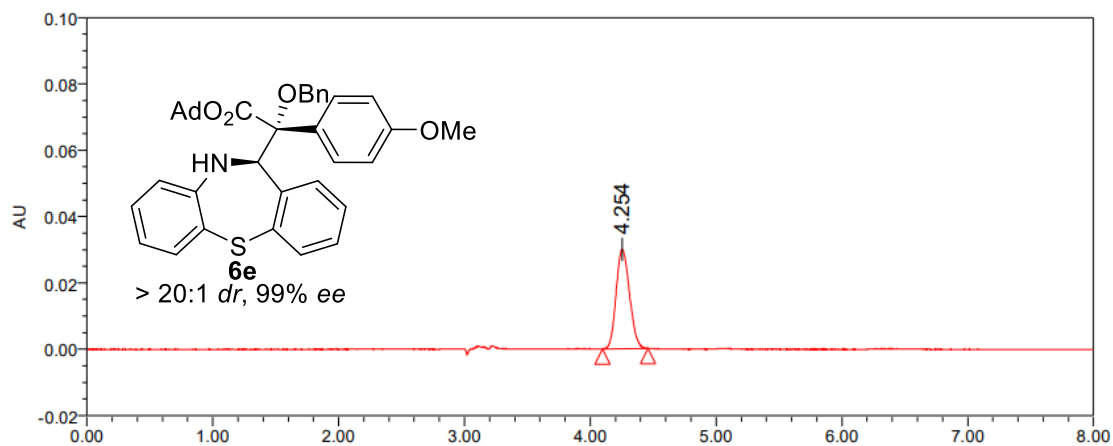

| Entry | RT<br>min | Height<br>mV | Area<br>mV.sec | % Area<br>% |
|-------|-----------|--------------|----------------|-------------|
| 1     | 4.254     | 29965        | 221794         | 100.00      |

Condition: Chrial IA,  $\lambda = 300$  nm, hexane/isopropanol = 95:5

flow rate = 1.0 mL/min

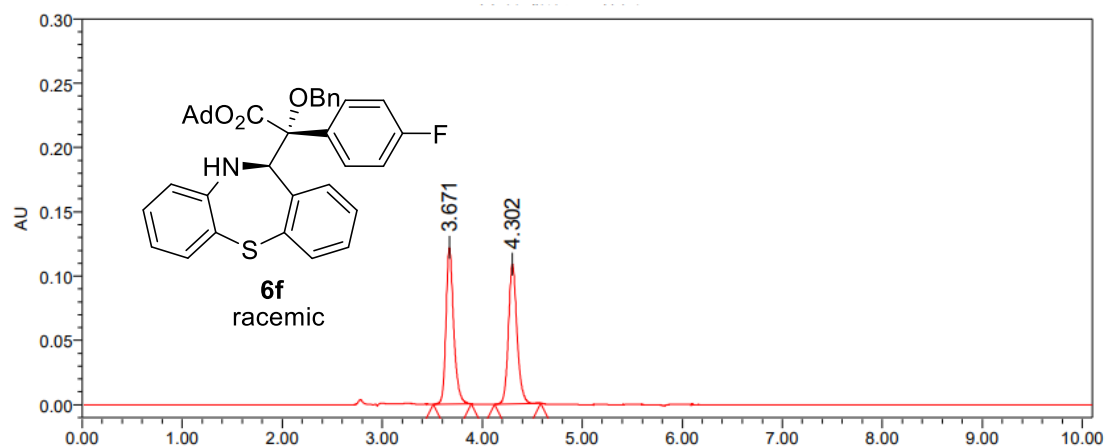

| Entry | RT<br>min | Height<br>mV | Area<br>mV.sec | % Area<br>% |
|-------|-----------|--------------|----------------|-------------|
| 1     | 3.671     | 122053       | 651878         | 50.06       |
| 2     | 4.302     | 108707       | 650433         | 49.94       |

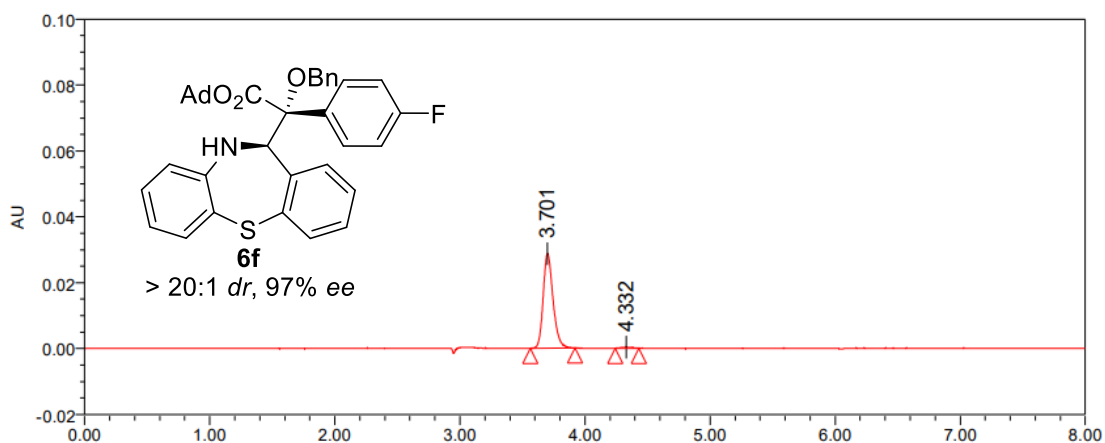

| Entry | RT min | Height mV | Area mV.sec | % Area % |
|-------|--------|-----------|-------------|----------|
| 1     | 3.701  | 28774     | 157658      | 98.86    |
| 2     | 4.332  | 331       | 1815        | 1.14     |

Condition: Chrial IA,  $\lambda = 300\text{nm}$ , hexane/isopropanol = 98:2

flow rate = 1.0 mL/min

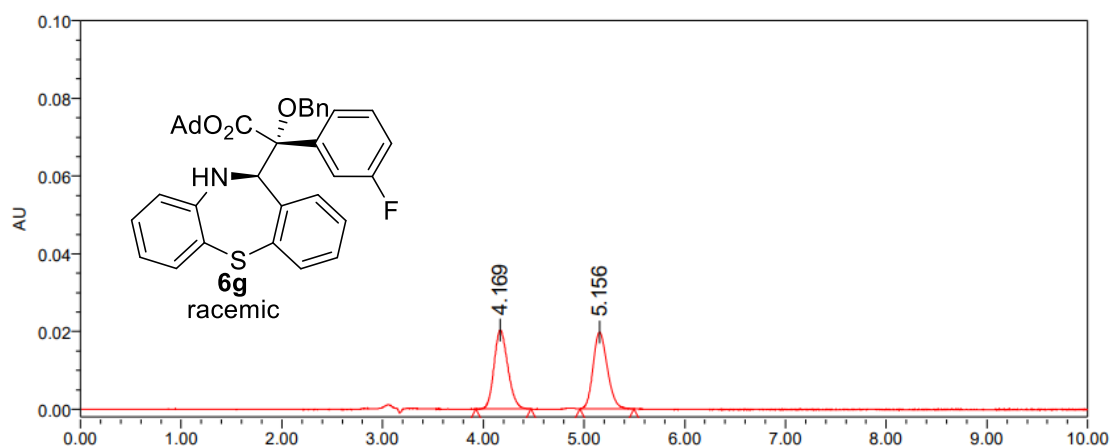

| Entry | RT min | Height mV | Area mV.sec | % Area % |
|-------|--------|-----------|-------------|----------|
| 1     | 4.169  | 20268     | 192859      | 50.05    |
| 2     | 5.156  | 19708     | 192435      | 49.95    |

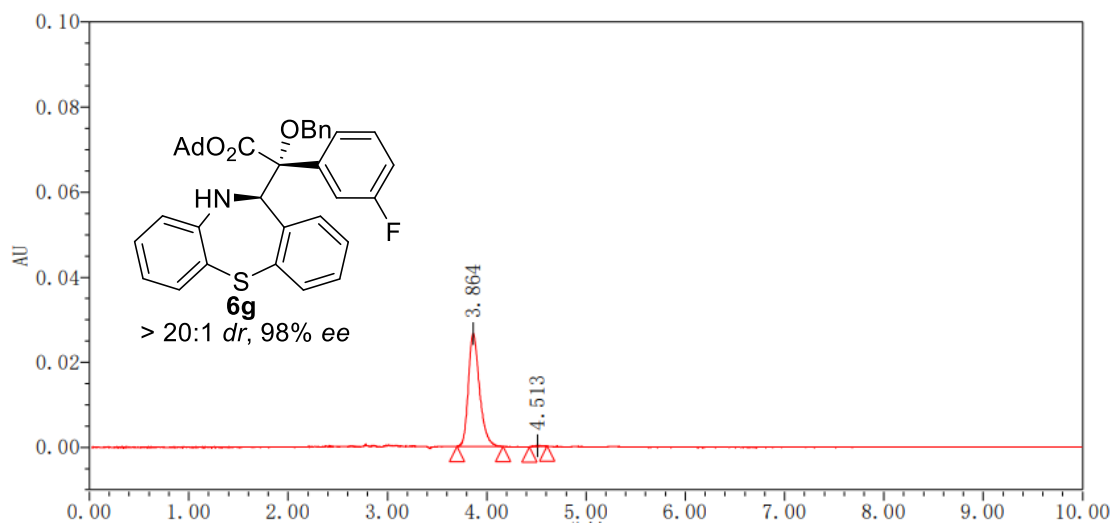

| Entry | RT min | Height mV | Area mV.sec | % Area % |
|-------|--------|-----------|-------------|----------|
| 1     | 3.864  | 26507     | 206421      | 99.52    |
| 2     | 4.513  | 220       | 1169        | 1.48     |

Condition: Chrial IA,  $\lambda = 254$  nm, hexane/isopropanol = 90:10

flow rate = 1.0 mL/min

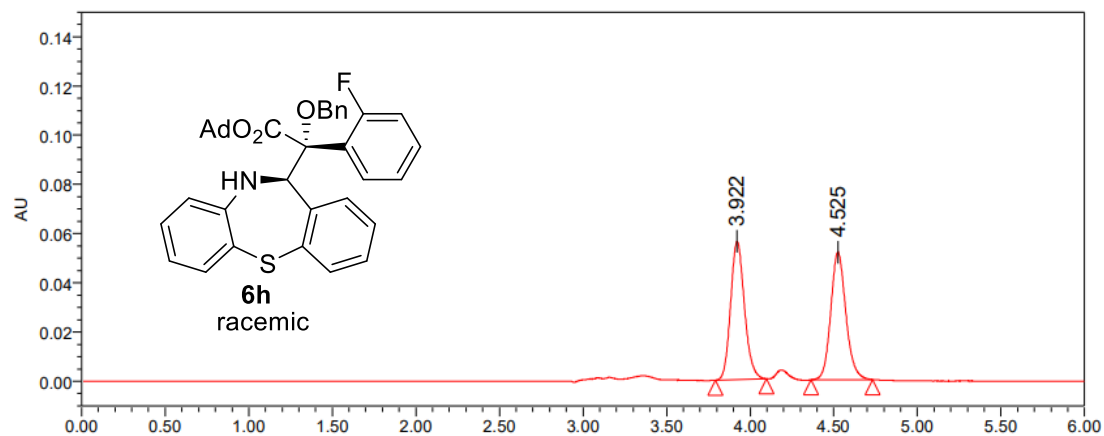

| Entry | RT min | Height mV | Area mV.sec | % Area % |
|-------|--------|-----------|-------------|----------|
| 1     | 3.922  | 56287     | 323758      | 49.83    |
| 2     | 4.525  | 51791     | 325919      | 50.17    |

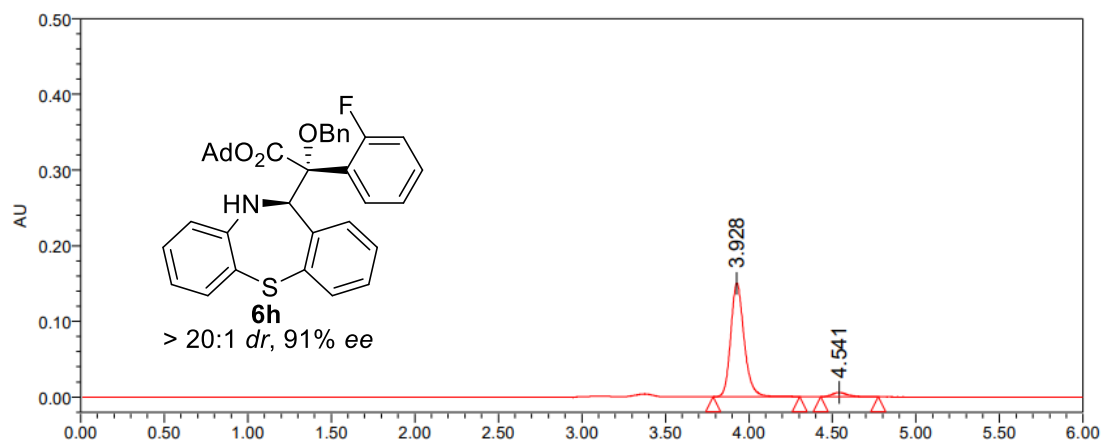

| Entry | RT min | Height mV | Area mV.sec | % Area % |
|-------|--------|-----------|-------------|----------|
| 1     | 3.928  | 150171    | 840569      | 95.79    |
| 2     | 4.541  | 5680      | 36964       | 4.21     |

Condition: Chrial AD-H,  $\lambda = 300$  nm, hexane/isopropanol = 80:20

flow rate = 0.5 mL/min

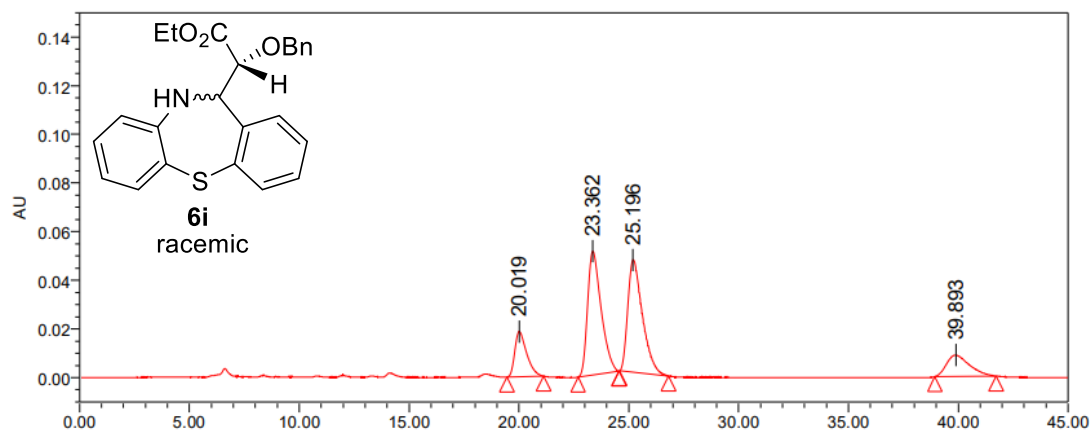

| Entry | RT min | Height mV | Area mV.sec | % Area % |
|-------|--------|-----------|-------------|----------|
| 1     | 20.019 | 18613     | 694550      | 12.30    |
| 2     | 23.362 | 50843     | 2169930     | 38.42    |
| 3     | 25.196 | 46237     | 2145186     | 37.98    |
| 4     | 39.893 | 8798      | 638334      | 11.30    |

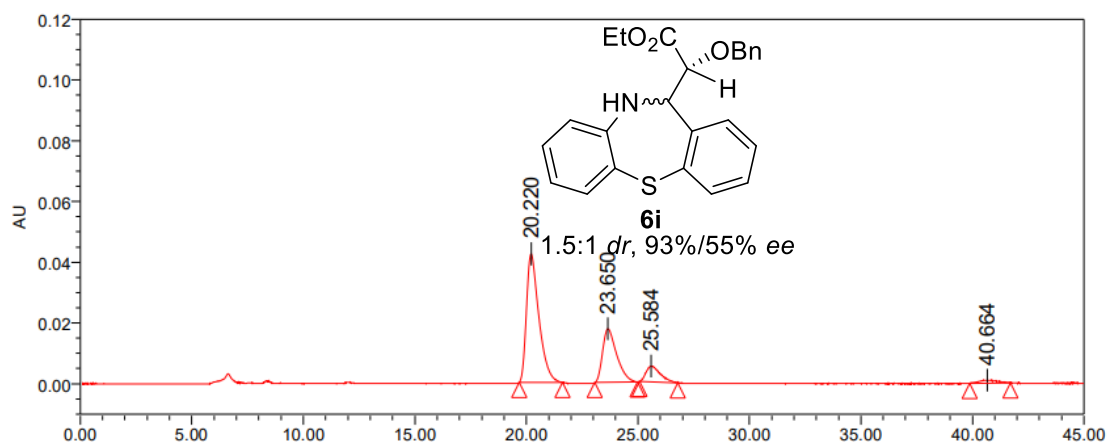

| Entry | RT min | Height mV | Area mV.sec | % Area % |
|-------|--------|-----------|-------------|----------|
| 1     | 20.220 | 42322     | 1637160     | 60.90    |
| 2     | 23.650 | 17667     | 771070      | 28.68    |
| 3     | 25.584 | 5165      | 229274      | 8.53     |
| 4     | 40.664 | 879       | 50741       | 1.89     |

Condition: Chrial IF-3,  $\lambda = 254$  nm, hexane/isopropanol = 98:2

flow rate = 1.0 mL/min

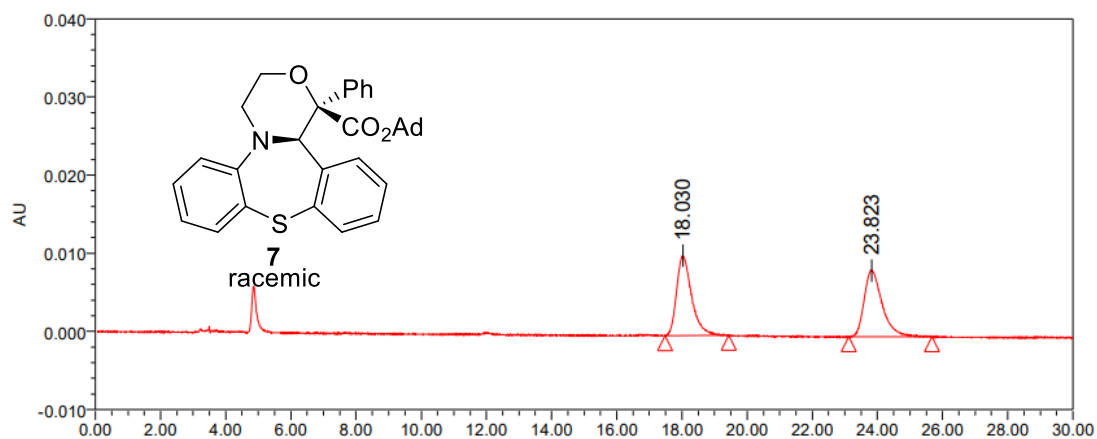

| Entry | RT min | Height mV | Area mV.sec | % Area % |
|-------|--------|-----------|-------------|----------|
| 1     | 18.030 | 10185     | 323113      | 49.70    |
| 2     | 23.823 | 8493      | 327067      | 50.30    |

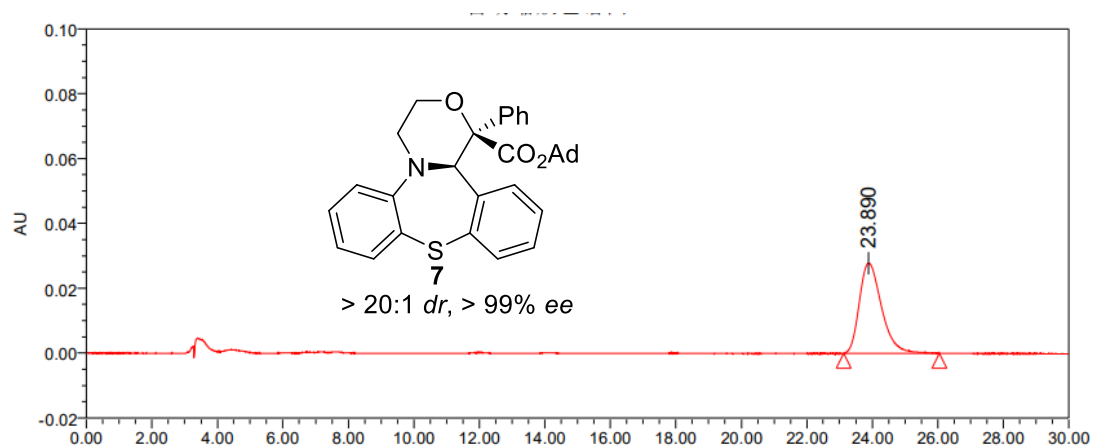

| Entry | RT min | Height mV | Area mV.sec | % Area % |
|-------|--------|-----------|-------------|----------|
| 1     | 23.890 | 27840     | 1294547     | 100.00   |

Condition: Chrial IF-3,  $\lambda = 331$  nm, hexane/isopropanol = 80:20

flow rate = 1.0 mL/min

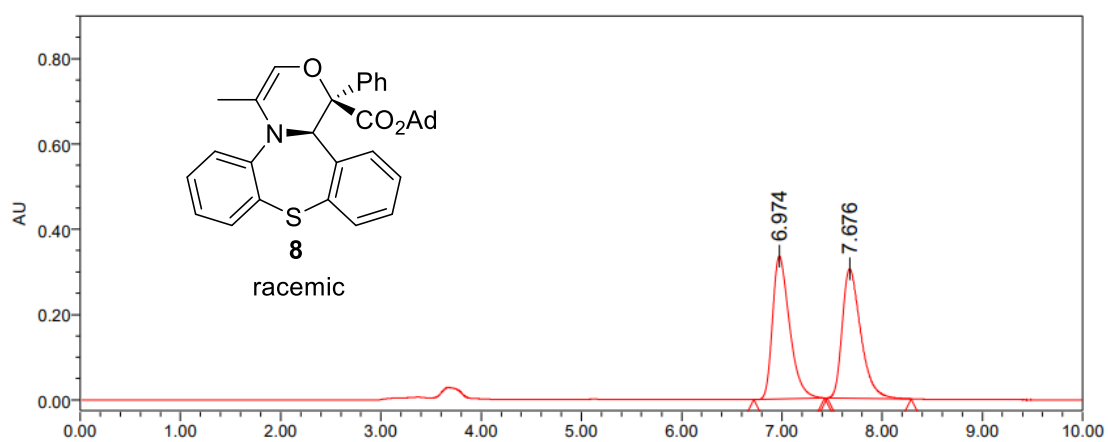

| Entry | RT min | Height mV | Area mV.sec | % Area % |
|-------|--------|-----------|-------------|----------|
| 1     | 6.974  | 335250    | 3947844     | 50.42    |
| 2     | 7.676  | 303130    | 3882395     | 49.58    |

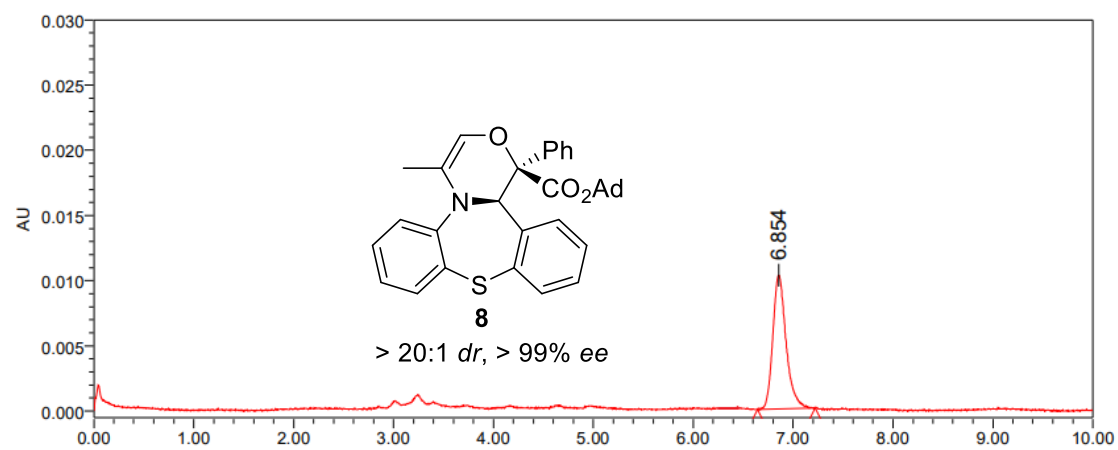

| Entry | RT<br>min | Height<br>mV | Area<br>mV.sec | % Area<br>% |
|-------|-----------|--------------|----------------|-------------|
| 1     | 6.854     | 10252        | 94608          | 100.00      |

## Crystallographic Data for 5a.

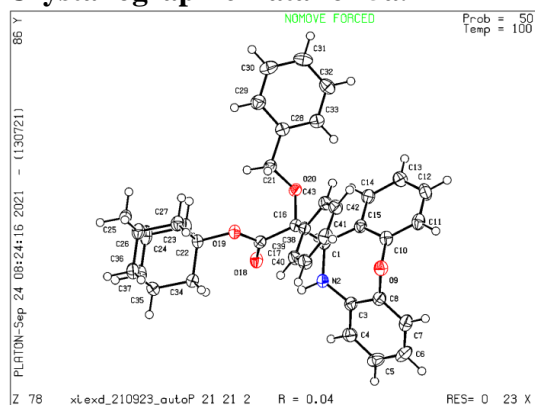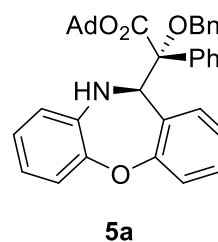

**CCDC 2126676**

Bond precision: C-C = 0.0034 Å

Wavelength=1.54184

Cell: a=17.3081 (2)

b=14.4922 (2)

c=11.9555 (2)

alpha=90

beta=90

gamma=90

Temperature: 100 K

|                        | Calculated                                       | Reported                                         |
|------------------------|--------------------------------------------------|--------------------------------------------------|
| Volume                 | 2998.83 (7)                                      | 2998.83 (7)                                      |
| Space group            | P 21 21 2                                        | P 21 21 2                                        |
| Hall group             | P 2 2ab                                          | P 2 2ab                                          |
| Moiety formula         | C <sub>38</sub> H <sub>37</sub> N O <sub>4</sub> | C <sub>38</sub> H <sub>37</sub> N O <sub>4</sub> |
| Sum formula            | C <sub>38</sub> H <sub>37</sub> N O <sub>4</sub> | C <sub>38</sub> H <sub>37</sub> N O <sub>4</sub> |
| Mr                     | 571.69                                           | 571.68                                           |
| Dx, g cm <sup>-3</sup> | 1.266                                            | 1.266                                            |
| Z                      | 4                                                | 4                                                |
| Mu (mm <sup>-1</sup> ) | 0.644                                            | 0.644                                            |
| F000                   | 1216.0                                           | 1216.0                                           |
| F000'                  | 1219.50                                          |                                                  |
| h, k, lmax             | 22, 18, 15                                       | 22, 17, 15                                       |
| Nref                   | 6491 [ 3636]                                     | 6219                                             |
| Tmin, Tmax             | 0.793, 0.879                                     | 0.472, 1.000                                     |
| Tmin'                  | 0.773                                            |                                                  |

Correction method= # Reported T Limits: Tmin=0.472 Tmax=1.000

AbsCorr = MULTI-SCAN

Data completeness= 1.71/0.96

Theta(max)= 78.916

R(reflections)= 0.0393 ( 5670)

wR2(reflections)=  
0.1013 ( 6219)

S = 1.051

Npar= 388



## Crystallographic Data for 7.

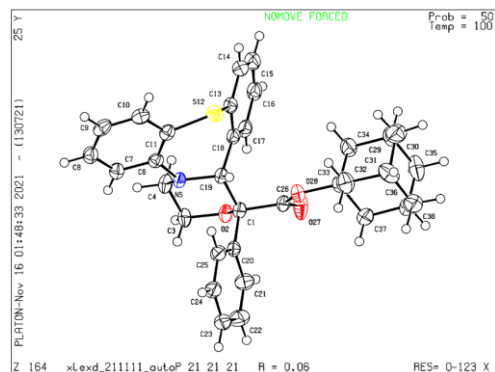

CCDC 2126677

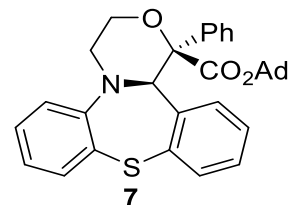

Bond precision: C-C = 0.0067 Å

Wavelength=1.54184

Cell: a=10.8906 (1)

b=13.7438 (2)

c=18.1534 (2)

alpha=90

beta=90

gamma=90

Temperature: 100 K

|                                     | Calculated                                         | Reported                                           |
|-------------------------------------|----------------------------------------------------|----------------------------------------------------|
| Volume                              | 2717.17 (6)                                        | 2717.17 (6)                                        |
| Space group                         | P 21 21 21                                         | P 21 21 21                                         |
| Hall group                          | P 2ac 2ab                                          | P 2ac 2ab                                          |
| Moiety formula                      | C <sub>33</sub> H <sub>33</sub> N O <sub>3</sub> S | C <sub>33</sub> H <sub>33</sub> N O <sub>3</sub> S |
| Sum formula                         | C <sub>33</sub> H <sub>33</sub> N O <sub>3</sub> S | C <sub>33</sub> H <sub>33</sub> N O <sub>3</sub> S |
| Mr                                  | 523.66                                             | 523.66                                             |
| D <sub>x</sub> , g cm <sup>-3</sup> | 1.280                                              | 1.280                                              |
| Z                                   | 4                                                  | 4                                                  |
| Mu (mm <sup>-1</sup> )              | 1.331                                              | 1.331                                              |
| F <sub>000</sub>                    | 1112.0                                             | 1112.0                                             |
| F <sub>000</sub> '                  | 1116.30                                            |                                                    |
| h, k, lmax                          | 13, 17, 23                                         | 13, 17, 23                                         |
| N <sub>ref</sub>                    | 5860 [ 3294 ]                                      | 5739                                               |
| T <sub>min</sub> , T <sub>max</sub> | 0.852, 0.875                                       | 0.780, 1.000                                       |
| T <sub>min</sub> '                  | 0.766                                              |                                                    |

Correction method= # Reported T Limits: T<sub>min</sub>=0.780 T<sub>max</sub>=1.000

AbsCorr = MULTI-SCAN

Data completeness= 1.74/0.98

Theta(max)= 78.786

R(reflections)= 0.0607 ( 5390)

wR<sub>2</sub>(reflections)=  
0.1609 ( 5739)

S = 1.043

N<sub>par</sub>= 343

## Reference

- 1 Y. Tang, Q. Chen, X. Liu, G. Wang, L. Lin and X. Feng, Direct synthesis of chiral allenates from the asymmetric C-H insertion of  $\alpha$ -diazoesters into terminal alkynes, *Angew. Chem. Int. Ed.*, 2015, **54**, 9512-9516.
- 2 Y. Ren, Y. Wang, S. Liu and K. Pan, Organocatalysed asymmetric direct Mannich reaction of acetophenone derivatives and dibenzo[*b,f*][1,4]oxazepines with azetidine-2-carboxylic acid, *ChemCatChem.*, 2014, **6**, 2985-2992
